# Supplementary material for: CD70, a novel target of CAR T-cell therapy for gliomas
Source: Oxford University Press journal article supplement (doi:10.1093/neuonc/nox116), 2017-06-20
Supplement: nox116_suppl_suppl_materials.docx [file nox116_suppl_suppl_materials.docx]

CD70, a novel target of CAR-T-cell therapy for gliomas

Linchun Jin1,2, Haitao Ge2, Yu Long1,2, Changlin Yang1, Yifan (Emily) Chang1¥, Luyan Mu2, Elias, J. Sayour1, Gabriel De Leon1¶, Qiong J. Wang3ⱡ, James C. Yang3, Paul S. Kubilis1, Hongbo Bao2, Songsong Xia2, Dunyue Lu2, Yingjun Kong4, Li Hu2, Yujiao Shang4, Chencheng Jiang4, Jing Nie4, Shimin Li4, Yunhe Gu5, Jiahang Sun6, Duane A. Mitchell1, Zhiguo Lin2🖂 & Jianping Huang1🖂

1 UF Brain Tumor Immunotherapy Program, Preston A Wells Center for Brain Tumor Therapy, Lillian S. Wells Department of Neurosurgery, University of Florida, Gainesville, Florida, USA

2 The Fourth Section of Department of Neurosurgery, the First Affiliated Hospital, Harbin Medical University, Harbin, China

3  The Surgery Branch, National Cancer Institute, Bethesda, Maryland, USA

4  The Second Section of Department of Pulmonary Medicine, the First Affiliated Hospital, Harbin Medical University, Harbin, China

5  Department of Pathology, the First Affiliated Hospital, Harbin Medical University, Harbin, China

6  The Department of Neurosurgery, the Second Affiliated Hospital, Harbin Medical University, Harbin, China

¥ Current address: Laboratory of Molecular and Cellular Neuroscience, The Rockefeller University, New York, New York, USA.

¶ Current address: Duke University Medical Center, Department of Surgery, Division of Applied Therapeutics, Durham, North Carolina, USA

ⱡ Current address: Oncology Research, MedImmune, Gaithersburg, Maryland, USA

Disclosure: All authors have declared there are no financial conflicts of interest in regards to this work.

Running Title: CD70 CAR-T therapy in gliomas

Key Words: Immunosuppressive ligand, CD70, Chimeric antigen receptors (CARs), immunotherapy, gliomas,

🖂 Correspondence: Z.L ([linzhiguo@hotmail.com](mailto:linzhiguo@hotmail.com)); or

J.H ([jianping.huang@neurosurgery.ufl.edu](mailto:jianping.huang@neurosurgery.ufl.edu)). Address: L1-178, 1149 Newell Dr. Gainesville, FL 32610. Tel: +1-352-273-6835, Fax: +1-352-392-8413.

**FIGURE LEGENDS**

**Figure S1.** CD70 gene expression on normal and transformed tissues. Data were adopted from GTEx Potal, <http://www.gtexportal.org/home/gene/CD70>. All genes and transcripts were calculated in reads per kilobase of transcript per million mapped reads (RPKM).
