# Supplementary material for: CD70, a novel target of CAR T-cell therapy for gliomas
Source: Oxford University Press journal article supplement (doi:10.1093/neuonc/nox116), 2017-06-20
Supplement: nox116_suppl_table_s2.xlsx [file nox116_suppl_table_s2.xlsx]

## Sheet: Sheet1
gene_id	Silence rep1	Silence rep2	Silence rep3	NT rep1	NT rep2	NT rep3	NTC rep1	NTC rep2	NTC rep3	Blank rep1	Blank rep2	Blank rep3	Overexp rep1	Overexp rep2	Overexp rep3
2015-03-01	0.380994	0.41695	0.73525	0.489138	0.649268	0.600819	0.375468	0.467427	0.389163	0.715297	0.614235	0.833558	0.256067	0.311717	0.296505
2015-03-01	0.523286	0.496881	0.490243	0.486196	0.533156	0.618851	0.662268	0.644903	0.620696	0.399921	0.560166	0.548092	0.494488	0.536951	0.465256
2015-03-02	0.824631	1.05307	1.23441	1.02851	1.30061	1.56395	1.05948	1.34004	1.22347	1.25412	1.36229	0.983139	0.79374	1.4213	1.24433
2015-03-02	9.42813	9.66307	10.347	10.6084	11.4638	12.018	10.0969	9.17768	10.1276	11.6272	11.6149	10.8824	9.36183	9.92071	11.7971
2015-03-03	0.0591427	0.0248985	0.0475671	0.0936597	0.0915527	0.0443881	0.0539264	0.0870466	0.0847521	0.00925642	0.0343754	0.0903381	0.0407757	0.00896362	0.0191851
2015-03-04	0	0.015369	0	0.0433562	0.0635717	0.0751481	0.0199707	0.0179097	0.0490428	0	0.0397862	0.0185883	0.0566313	0.0497971	0.0444094
2015-03-05	8.84724	9.22918	9.05687	7.94667	7.88798	7.92615	8.42151	8.60445	8.74772	8.41059	8.5803	8.66416	8.70247	8.36239	8.67545
2015-03-06	15.4272	14.7508	14.7703	15.6671	15.5862	16.1866	13.4593	14.2247	14.1565	14.7611	14.1849	14.0299	13.4661	13.553	13.5648
2015-03-07	22.0851	19.8948	21.9465	22.3323	21.9527	21.2306	23.2392	22.9421	22.2571	22.0539	21.0135	21.5063	20.345	19.693	20.3288
2015-03-08	5.71757	5.62318	4.96121	4.1456	3.93716	4.00555	4.44742	4.28607	3.79602	4.49888	4.52869	5.08806	4.80714	4.61142	4.59311
2015-03-09	6.62637	7.03518	6.86586	7.02353	7.13964	7.3015	6.09234	6.80489	6.52322	7.11223	7.09334	6.31957	7.18409	6.58299	6.96325
2015-03-10	0.3675	0.572978	0.446602	0.388126	0.368845	0.306534	0.476718	0.333921	0.541355	0.600656	0.616966	0.526546	0.394108	0.284642	0.410559
2015-03-11	0	0	0	0	0	0	0	0	0	0	0	0	0.0304034	0	0
2015-09-01	0.953487	0.802529	0.7575	0.854151	1.02177	1.11253	0.83485	0.770907	1.08593	0.789484	1.14812	0.884065	1.15972	0.942988	0.954488
2015-09-02	158.249	155.133	160.245	166.273	161.031	161.128	163.154	165.229	163.909	170.333	167.046	171.872	153.427	151.575	151.635
2015-09-03	1.54274	1.86549	1.52041	2.7394	2.70435	2.56963	2.35382	2.65859	2.28731	2.05984	1.78426	2.04443	3.01228	3.29547	3.15212
2015-09-04	2.30235	1.94418	2.33488	4.19279	4.40858	4.10887	2.59776	2.4226	2.12615	3.40962	3.75036	3.26213	2.72877	2.39524	2.39479
2015-09-05	8.24849	8.58205	6.93341	10.8933	10.3528	10.6946	9.2719	11.3802	11.0713	10.1971	10.119	10.2913	10.7997	10.7276	10.5297
2015-09-06	7.87507	7.95112	9.22456	5.76432	6.64437	6.23465	8.03056	8.694	8.15987	7.68225	7.47938	7.33593	7.21439	7.5817	7.22679
2015-09-07	73.5671	73.0542	74.355	76.132	73.0997	74.5305	76.5273	77.433	77.3164	81.0998	78.5075	81.9876	73.1959	72.2048	72.0401
2015-09-08	15.9248	15.3201	15.8364	17.6374	17.6561	17.0668	16.2996	15.4435	16.2739	15.2583	15.47	14.8969	12.9166	12.1428	12.583
2015-09-09	193.135	197.335	196.769	136.281	145.69	137.483	156.892	154.557	155.329	160.62	169.623	162.556	186.093	191.54	187.68
2015-09-10	19.2167	18.8484	18.9673	24.3203	23.99	23.7267	23.4256	23.2652	23.3918	24.2892	22.2199	22.9697	22.4208	21.3783	22.0121
2015-09-11	52.2072	51.1367	51.4242	49.1198	47.2746	48.2933	60.4349	60.4715	60.8389	59.4065	59.7725	61.0971	60.7555	58.6914	58.5756
2015-09-12	0	0	0	0.0280807	0	0	0.0361405	0.0323707	0	0	0	0	0	0	0
2015-09-14	0.0929211	0.0060766	0	0.0205746	0.0201975	0	0	0.0106226	0.00232712	0	0.00314597	0.0330694	0.0298546	0.00984415	0.00351159
2015-09-15	75.5277	71.1749	76.077	78.497	76.6415	77.6184	73.0131	73.4086	74.5314	81.9811	78.0892	79.2067	66.3179	64.8853	66.5516
2015-12-01	0	0	0	0.0354933	0	0.100833	0	0.109768	0.0400926	0	0	0	0	0.0676991	0
A1BG	4.25813	4.40165	4.06007	4.1228	4.40007	4.35477	3.32817	3.39784	4.12428	4.30012	4.36054	3.87528	4.37674	4.11916	4.06868
A1BG-AS1	0.693941	0.713225	0.642322	0.748263	0.625099	0.545383	0.751097	0.653399	0.737488	0.605945	0.404308	0.656836	0.688323	0.623485	0.549448
A1CF	0	0	0.00411445	0.00404562	0.00990146	0	0	0	0	0	0	0.00434225	0.00440841	0	0
A2M	31.5966	31.7443	32.1945	41.8218	40.1049	40.999	32.8145	33.3437	33.9078	24.3173	25.4891	25.1665	32.8067	32.8607	32.0927
A2M-AS1	0	0.0659654	0	0.0745246	0.106228	0.0529615	0.0429042	0.0384557	0	0.0183894	0.034143	0.0199342	0	0.0534258	0.0381138
A2ML1	0	0	0	0	0	0	0.00849628	0	0	0	0	0	0	0.000441435	0
A2MP1	0	0	0	0	0	0	0	0	0	0	0	0	0	0	0
A4GALT	0.104619	0.155924	0.139004	0.411076	0.430491	0.408047	0.0450773	0.0404014	0	0.0965923	0.0358676	0.0418813	0.08512	0.0935422	0.0200197
A4GNT	0	0.041786	0.023947	0.047236	0	0.0447502	0.0543847	0.0243664	0.026695	0.0698858	0.0216247	0.0252475	0.0513259	0	0.0241407
AA06	0	0	0	0	0	0	0	0	0	0	0	0	0	0	0
AAAS	17.0057	17.4363	16.848	17.8223	17.0111	17.3335	15.5334	16.2752	15.8889	17.1234	18.1664	17.7288	17.2001	16.7189	17.7119
AACS	16.3737	16.0693	16.153	14.5566	14.8626	15.1908	13.8344	13.6499	13.7348	13.7037	13.9626	14.0101	13.1818	13.1771	13.1843
AACSP1	0.118381	0.132873	0.0380749	0.112587	0.0917041	0.109221	0.151239	0.0968264	0.106072	0.129644	0.10316	0.100382	0.122405	0.0896787	0.191929
AADAC	0	0	0	0	0	0	0	0	0	0	0	0	0	0	0
AADACL2	0	0	0	0	0	0	0	0	0	0	0	0	0	0	0
AADACL3	0	0	0	0	0	0	0	0	0	0	0	0.0108783	0	0	0
AADACL4	0	0	0	0	0	0	0	0	0	0	0	0	0	0	0
AADAT	11.0357	10.4142	10.0068	14.5142	14.8418	13.4238	14.8699	15.7878	14.9258	15.004	15.6923	15.2633	13.6497	12.915	12.6587
AAED1	24.6489	24.955	24.2885	20.9167	22.7817	19.9275	22.8631	20.9608	22.2484	22.4761	22.4253	22.9888	21.4495	19.6158	19.7995
AAGAB	18.5127	19.0505	19.8361	18.5694	18.6585	17.9375	20.3411	19.8377	19.4571	20.2103	19.0184	19.9404	19.6158	18.9901	19.4963
AAK1	2.75546	2.91724	2.90548	2.60082	2.59396	2.58681	2.86367	2.71353	2.87031	2.32066	2.26953	2.37967	3.00321	2.89499	2.89693
AAMDC	31.9936	32.0102	33.5131	27.6044	25.7913	27.0805	29.3907	30.4371	29.8845	35.0371	33.1824	30.6288	24.2368	26.4869	29.867
AAMP	59.3832	62.5609	62.2851	60.2062	59.9927	57.6066	59.6163	58.0296	60.424	61.5628	61.5195	59.9883	61.7397	65.7155	63.6066
AANAT	0	0	0	0.0453623	0.0176264	0	0.0522132	0	0.0512139	0	0.124196	0.0483051	0	0.020677	0.0924482
AAR2	23.0198	23.3935	23.5241	21.0512	22.071	20.2605	21.1813	21.5028	22.3934	22.846	23.6133	23.0543	21.7336	22.171	22.1554
AARD	0	0	0	0	0	0	0	0	0	0	0	0	0	0	0
AARS	42.2886	42.0376	42.5279	37.2036	36.8242	39.0044	35.2913	36.9118	36.003	39.1694	39.253	39.9962	38.2652	38.4016	39.1328
AARS2	4.78817	4.60352	4.37223	4.78418	4.94515	5.03036	4.96296	5.11523	4.92675	4.43502	5.11382	4.663	4.84904	5.07398	4.75257
AARSD1	20.5249	22.5024	21.1563	19.7439	18.5604	21.2515	22.0303	21.162	20.7681	21.3267	22.4106	22.357	20.5121	21.56	23.2331
AASDH	4.38904	4.10865	3.84568	4.19845	4.09501	4.06869	4.62604	4.26144	4.74234	4.43582	4.083	4.86866	3.88193	3.50785	3.54039
AASDHPPT	26.0381	24.946	25.9813	26.9868	25.8382	27.3648	26.535	27.0287	26.8447	28.4231	27.6857	28.423	26.8954	24.8559	26.2779
AASS	12.1484	12.0079	11.6787	14.5369	14.6001	15.0674	14.2598	13.8487	13.8549	13.1663	13.0451	12.9311	10.5895	10.7798	11.0907
AATF	54.6302	56.6819	56.5455	48.8837	48.9452	48.6604	52.2072	49.9326	50.2402	54.9019	53.8306	53.7374	55.6021	54.9049	52.8462
AATK	0.34101	0.313845	0.321482	0.0904062	0.159566	0.207106	0.0867569	0.0804017	0.0767019	0.126611	0.138295	0.113074	0.0492087	0.129817	0.185236
AATK-AS1	0	0	0	0	0	0	0	0.0278355	0	0	0	0	0	0	0
ABAT	1.64575	1.69132	1.66291	2.69882	2.54317	2.5885	1.90332	1.45957	1.82451	2.28102	2.10886	2.30246	1.49501	1.5974	1.39868
ABCA1	2.84123	2.80396	2.77523	5.65935	5.4193	5.69873	6.58429	6.59093	6.2227	4.7991	4.86636	4.7209	9.46109	9.15072	9.3925
ABCA10	0.499321	0.383192	0.457551	0.198118	0.180952	0.193502	0.165927	0.175696	0.156215	0.243382	0.203923	0.160948	0.130737	0.126462	0.129187
ABCA11P	2.37848	2.58288	2.62187	2.51538	2.51197	2.2381	2.42663	2.93392	2.65703	2.48586	2.23191	2.6196	2.42185	2.51822	2.57665
ABCA12	0.0696184	0.086967	0.0715471	0.0233259	0.0647577	0.0309589	0.0590973	0.062648	0.032727	0.0286081	0.0265661	0.0501179	0.0508042	0.0522413	0.0526599
ABCA13	0.109368	0.118961	0.112173	0.227159	0.240056	0.213319	0.132048	0.151989	0.102816	0.104873	0.123208	0.0905393	0.202672	0.201031	0.208493
ABCA17P	0.0194563	0.0491456	0.075112	0.0377436	0.045177	0.0350457	0.0638644	0.0859074	0.0731875	0.0365415	0.0260099	0.029719	0.0100606	0.0537589	0.0189342
ABCA2	16.0052	16.0977	16.133	17.4844	18.656	16.7407	14.3318	14.2552	13.9599	16.2227	17.3383	16.3134	16.6803	17.6124	17.3901
ABCA3	2.05711	2.39762	2.2476	2.4887	2.76887	2.58558	2.22371	2.04779	2.24941	2.26065	2.1673	1.8803	2.09166	2.31639	2.03694
ABCA4	0.00033982	0	0	0.0106724	0	0	0.00594691	0	0	0	0	0.00553849	0.00562332	0	0
ABCA5	5.32587	5.35758	5.14781	4.34241	4.13144	4.42531	3.43198	3.3266	3.285	3.36543	3.45028	3.67394	3.52298	3.06421	3.06131
ABCA6	7.84428	8.0337	7.492	6.91619	6.96067	6.96712	3.67847	3.97832	4.04684	6.87306	6.43129	6.50841	3.46182	3.48	3.3244
ABCA7	4.56064	4.60931	4.54145	4.92675	5.56864	4.93936	3.8934	3.95742	3.79348	2.94173	3.06821	3.10894	3.54144	3.70054	3.52152
ABCA8	1.23584	0.951918	0.840403	6.33441	6.21705	6.37777	3.86363	4.2736	4.23318	5.06466	4.80023	4.37217	3.02828	2.63738	3.0184
ABCA9	0.330287	0.283462	0.306537	0.317748	0.292425	0.251649	0.0926364	0.139172	0.156985	0.234639	0.173543	0.219968	0.0656908	0.109755	0.125702
ABCB1	0.00858745	0.0144613	0	0.0163172	0.00725012	0.00773353	0.0187901	0.0421285	0.019117	0.0403226	0.0175272	0.0262364	0.036511	0.0406088	0.0250721
ABCB10	6.84111	6.3616	6.85093	6.45364	6.53568	6.77648	6.2007	7.0025	6.72168	6.91562	6.80912	7.16315	6.65591	6.13721	5.6074
ABCB11	0	0	0	0	0	0.000693951	0	0	0	0	0	0	0	0	0.000749939
ABCB4	0	0	0.0099142	0	0	0	0	0	0	0	0.0186595	0	0.0106234	0	0
ABCB5	0.0512348	0.0640201	0.0366902	0.0180805	0.00290364	0.0226899	0.100332	0.0584111	0	0.0960246	0.0223117	0.019347	0.0196588	0.0172836	0.0554907
ABCB6	25.2148	26.1616	24.8388	21.7659	22.8958	22.5656	18.6502	18.3314	18.3908	21.377	22.7723	21.4024	18.0911	19.0906	19.1149
ABCB7	9.81468	9.31441	9.36495	10.2458	9.40766	9.91015	10.2305	10.3652	9.44065	9.9915	9.81391	9.82339	8.53909	8.59673	8.72891
ABCB8	10.5492	10.9934	10.9364	10.7338	10.692	10.5563	10.799	10.0242	10.8125	10.8862	11.774	10.6865	11.4874	11.6746	11.4162
ABCB9	6.11794	7.01293	7.01018	5.44493	5.67467	5.51361	5.40492	5.50129	5.59262	5.68565	5.95511	5.5878	6.19153	6.68344	6.36339
ABCC1	10.5898	10.5323	10.392	10.2157	10.317	10.5717	8.03439	8.34775	8.09459	9.51123	9.64889	9.25667	10.3519	10.5338	10.6766
ABCC10	10.7694	11.2118	11.3601	11.6273	10.9661	11.5473	9.85168	10.8847	10.1947	9.44839	10.0719	10.5774	10.2132	10.5914	10.3953
ABCC11	0.00909739	0.0306484	0	0	0	0	0	0.0178558	0.0195581	0	0.00793184	0.00926445	0.00940837	0	0
ABCC12	0	0	0	0	0	0	0	0	0	0	0	0	0	0	0
ABCC13	0	0	0	0	0	0	0	0	0	0	0	0	0	0	0
ABCC2	0.383655	0.363421	0.324008	0.197424	0.296901	0.259119	0.104929	0.125474	0.0515377	0.105088	0.209073	0.146525	0.256251	0.254406	0.27226
ABCC3	0.288219	0.274	0.112023	0.349126	0.422401	0.463408	0.304258	0.182184	0.303179	0.137204	0.100247	0.0711582	0.213171	0.226463	0.186605
ABCC4	4.80306	4.63757	4.55532	5.21922	4.99603	5.51359	5.48344	5.64879	5.35951	5.31098	5.51714	5.81602	5.79004	5.90116	5.89945
ABCC5	13.8869	14.3418	13.9815	15.914	14.5699	14.7222	14.478	14.6373	14.3495	13.1744	13.2847	14.4084	12.2794	12.3677	12.8976
ABCC5-AS1	0	0	0	0	0	0	0	0	0	0	0	0	0	0	0
ABCC6	0.271048	0.15692	0.356699	0.42816	0.0423219	0.219326	0.135034	0.0453928	0.285738	0.0795309	0.345805	0.3363	0.0262301	0.0722546	0.172256
ABCC6P1	0.00385009	0	0.0148613	0.0478262	0	0.0231245	0	0	0.0375265	0.0192783	0.0214769	0.020901	0.0212334	0.0140018	0.0249728
ABCC6P2	0.29422	0.307867	0.466157	0.280131	0.0916299	0.224691	0.129506	0.115726	0.513147	0.0857287	0.299977	0.370936	0.0540295	0.0830466	0.368025
ABCC8	1.44452	1.47595	1.38638	1.26438	1.30001	1.27161	1.06537	0.883813	0.872125	1.35658	1.23827	1.28932	0.553924	0.693728	0.379103
ABCC9	0.489888	0.630742	0.543089	0.628242	0.582052	0.635375	0.571601	0.537518	0.624807	0.525794	0.48666	0.501255	0.568335	0.452114	0.41977
ABCD1	7.99502	9.01302	7.66733	8.26847	8.54093	8.0994	6.7808	6.69974	6.49159	7.9125	8.0445	8.16528	7.76393	7.89323	8.10931
ABCD2	0.0980301	0.0507957	0.0727827	0.0644713	0.0641893	0.0611146	0.032997	0.0369925	0.0810367	0.0708187	0.0394507	0.0921618	0.0389937	0.0356605	0.0293562
ABCD3	24.1667	23.152	22.0272	24.8872	24.3913	22.5727	21.0532	22.6662	21.3132	23.1277	23.0552	22.5895	21.6019	20.64	21.0389
ABCD4	4.38689	3.69343	3.47398	3.92861	4.3094	4.50365	4.30797	4.19157	4.27319	4.41099	3.77718	4.08484	3.80394	3.57259	3.61651
ABCE1	41.477	40.8811	39.7385	38.5255	38.4383	38.0207	43.8546	43.646	42.9771	42.7243	41.6209	42.7215	42.9933	40.9434	40.9277
ABCF1	72.6935	73.0889	72.7698	73.4187	74.6971	73.8137	77.7068	78.489	78.0534	73.4465	75.0484	73.8764	79.6308	82.1451	83.9517
ABCF1	0	0	0	0	0	0	0	0	0	0	0	0	0	0	0
ABCF1	0	0	0	0	0	0	0	0	0	0	0	0	0	0	0
ABCF1	0	0	0	0	0	0	0	0	0	0	0	0	0	0	0
ABCF1	0	0	0	0	0	0	0	0	0	0	0	0	0	0	0
ABCF1	0	0	0	0	0	0	0	0	0	0	0	0	0	0	0
ABCF1	0	0	0	0	0	0	0	0	0	0	0	0	0	0	0
ABCF2	41.9155	43.0984	43.192	38.9423	39.5514	38.4196	43.4685	43.1199	43.4067	40.6118	42.6452	43.0703	42.556	45.5233	43.9613
ABCF3	26.212	27.3665	25.3888	26.9474	27.0269	26.4967	25.8423	24.2123	26.1928	25.5625	24.8172	25.611	26.8588	26.6029	27.0488
ABCG1	0	0	0	0	0	0	0	0	0	0	0.00612667	0	0	0.00185716	0
ABCG2	0.378919	0.239293	0.395062	0.313572	0.201449	0.288973	0.310942	0.179904	0.250832	0.259856	0.254703	0.308089	0.208584	0.19175	0.217773
ABCG4	0.10242	0.114977	0.164862	0.129774	0.176388	0.194753	0.298877	0.335001	0.146779	0.106858	0.139758	0.185393	0.188297	0.232999	0.288102
ABCG5	0.0153029	0.0386499	0.0443018	0	0	0.0137867	0	0	0	0.0143673	0.0133382	0.0155766	0	0.00126484	0.0148889
ABCG8	0	0	0.0152188	0	0	0	0	0.0154774	0	0	0	0	0	0	0.015344
ABHD1	0.0313648	0.0263974	0.0907647	0.11945	0.121606	0.0565694	0.0343794	0.0923885	0.0674843	0.147144	0.191217	0.0637752	0.0324245	0.0570024	0.0609933
ABHD10	17.0691	18.1611	17.5324	17.5832	16.9761	18.0678	18.2535	18.4456	18.049	18.722	17.478	18.4639	18.932	18.4079	18.1101
ABHD11	14.9945	15.1678	13.8382	15.1341	15.9441	16.0698	15.0807	12.9455	13.526	12.9377	13.8057	12.6105	15.4414	15.4621	15.1269
ABHD12	56.6524	57.8967	55.687	53.7022	54.8333	52.9863	48.9721	48.5439	49.4242	55.9032	56.4655	55.7796	50.2628	52.7813	50.3802
ABHD12B	0	0	0.0590252	0	0.0474449	0	0	0	0	0.0861221	0.0225349	0	0	0	0
ABHD13	6.42839	6.34694	6.02125	6.31612	5.93894	6.27236	6.41518	5.71815	5.78138	6.22271	5.96956	5.92032	5.79171	5.7563	5.69437
ABHD14A	6.66088	7.39887	7.62559	7.78459	8.419	8.5265	5.69918	5.89461	7.06977	7.42401	9.14315	7.79797	5.8531	5.81469	6.63478
ABHD14A-ACY1	0.830507	1.41515	0.00027704	9.75255e-05	0.000112926	0.277248	1.19387	0.189385	0.000162516	0.433492	0.346329	0.22081	0.29152	0.763042	0.00172822
ABHD14B	11.001	11.0284	11.0374	9.53634	10.0722	9.70223	10.5086	8.94063	9.72256	11.2113	11.1014	10.7301	9.7808	11.096	10.5492
ABHD15	7.8152	7.56863	7.58975	7.58347	7.43177	7.72144	6.59982	6.1955	6.52186	6.18261	6.14763	6.62441	6.84733	7.3636	7.02984
ABHD16A	25.4385	25.1689	23.9955	24.194	25.2411	24.1353	20.9336	22.9084	21.6889	24.4453	24.9924	25.2347	20.757	22.1438	22.7682
ABHD16A	0	0	0	0	0	0	0	0	0	0	0	0	0	0	0
ABHD16A	0	0	0	0	0	0	0	0	0	0	0	0	0	0	0
ABHD16A	0	0	0	0	0	0	0	0	0	0	0	0	0	0	0
ABHD16A	0	0	0	0	0	0	0	0	0	0	0	0	0	0	0
ABHD16A	0	0	0	0	0	0	0	0	0	0	0	0	0	0	0
ABHD16A	0	0	0	0	0	0	0	0	0	0	0	0	0	0	0
ABHD16B	1.7072	1.70775	1.26513	1.0594	1.39976	1.20438	1.13842	1.02011	1.01116	0.975274	1.09933	0.931175	1.35579	1.23684	1.58819
ABHD2	30.7986	31.6198	31.278	35.8529	36.2699	36.3674	40.0613	40.7875	41.2658	40.6725	41.0617	41.0766	40.588	39.7232	40.3667
ABHD3	6.91527	7.24578	7.27705	13.4134	13.159	13.4247	10.8681	11.1555	10.7607	13.1194	11.3416	11.6913	9.65601	10.4072	9.53115
ABHD4	3.14956	3.85673	3.41302	3.44299	3.69144	3.4448	2.43397	2.77698	2.58935	3.17819	3.11197	3.22268	3.13487	2.77153	2.4852
ABHD5	4.74712	4.08585	4.17524	4.77402	4.51186	4.4103	4.46065	4.52469	4.85893	4.10497	4.15889	4.1989	4.37266	4.05033	4.13689
ABHD6	11.4593	11.1135	11.7422	9.8675	9.56519	9.4304	9.71093	9.59277	9.53586	9.63361	10.6207	9.83884	9.90493	11.9176	11.3898
ABHD8	9.16817	10.0418	8.98527	7.93636	8.7866	8.89748	7.91951	7.62378	8.37403	8.60587	9.3355	8.57383	9.6075	9.96349	8.69779
ABI1	8.26977	8.10847	7.74468	6.45955	6.58511	6.61559	7.06129	7.90337	7.15305	7.1132	6.48509	7.10978	6.58762	7.34613	6.80714
ABI2	20.6076	20.9131	21.2887	23.3209	22.1962	23.3041	22.3083	21.6952	22.1478	23.2343	21.2272	22.6263	20.5696	19.8582	19.7606
ABI3	0	0	0	0	0	0	0.0223362	0	0	0	0	0	0	0	0
ABI3BP	3.8692	3.52398	3.29413	19.448	18.4626	18.271	5.58145	5.59326	6.02894	5.00382	4.86729	5.1859	5.51051	5.34906	5.81274
ABL1	13.7868	14.7312	14.7334	14.6609	14.8655	14.0211	14.2922	14.1799	13.9527	13.8911	14.7064	13.6012	16.376	17.3575	17.2111
ABL2	5.81022	5.43537	5.4437	6.15454	5.93321	6.0259	6.18995	6.00729	6.35241	5.00804	4.81662	5.03434	6.14192	6.0268	6.1767
ABLIM1	0.391589	0.456596	0.434154	0.903095	0.877157	0.847673	0.945464	0.86781	0.921197	0.649629	0.53916	0.672745	0.716197	0.733514	0.721995
ABLIM2	0	0.0137714	0.0157847	0.0155522	0.0515173	0.00113334	0	0	0.0527582	0	0	0.0166494	0.0125878	0.0297438	0.0118477
ABLIM3	1.64171	1.52448	1.47584	1.92529	1.62641	1.7489	2.30944	2.35642	2.59116	1.84122	2.09386	1.94887	2.53218	2.23512	2.16371
ABO	0	0	0	0	0	0	0	0.0277947	0	0	0	0	0	0	0
ABP1	0	0	0	0	0	0	0	0	0	0	0	0	0	0	0
ABR	71.7997	72.4961	72.4245	60.7113	63.4957	62.1205	65.5819	64.3109	66.7101	58.2138	60.3917	58.8666	74.3885	76.0486	75.266
ABRA	0	0.038437	0	0	0	0.0137107	0	0	0	0	0	0.0154909	0	0	0
ABRACL	17.1662	16.9613	14.5407	14.3451	14.1304	14.1814	13.0459	12.5103	11.8666	11.2989	12.2412	12.8195	11.7615	12.8333	11.3518
ABT1	14.129	13.1805	12.796	12.4498	12.9169	12.5279	11.5877	12.2936	12.1288	12.5651	13.3321	13.111	10.5329	12.7187	12.1666
ABTB1	19.6866	19.7767	20.8664	16.0622	17.0262	18.0392	13.8895	13.1103	14.4015	13.8992	15.2571	14.4697	14.2879	15.888	14.4619
ABTB2	10.1249	10.6172	10.4009	10.9114	10.674	10.5632	10.5627	10.0393	9.95065	10.0989	11.071	10.4542	10.3219	10.8197	10.5626
ACAA1	31.8032	34.4392	32.8823	29.5023	29.0796	28.4927	28.6966	27.777	30.455	30.6501	31.3933	30.3629	30.0182	30.9078	30.6973
ACAA2	28.1216	28.1075	28.0864	26.7273	27.6745	27.8645	29.9281	29.2803	30.6156	30.7923	29.9683	29.7981	29.0878	26.2255	27.3311
ACACA	18.0086	17.7233	17.5312	19.5142	19.0216	18.8625	21.2272	20.887	20.7524	19.4734	19.9113	20.3123	21.7776	21.4786	22.0624
ACACB	1.39113	1.27566	1.22787	1.67031	1.57939	1.7492	0.936037	1.13352	1.17713	1.33045	1.3547	1.3907	1.20388	1.27069	1.2538
ACAD10	7.4982	7.26354	6.98151	8.36823	8.19954	8.34332	7.24437	7.25865	6.79074	7.61937	7.47923	7.44227	6.14817	6.96905	6.86009
ACAD11	10.1325	9.74237	10.0732	10.8616	10.6134	10.4563	11.8857	10.9351	11.4694	10.7398	9.5654	9.9673	8.42728	7.92256	8.47216
ACAD8	11.399	10.7422	10.3294	9.61985	9.76431	9.7288	9.45754	9.83256	9.74658	9.58648	9.42496	8.55103	7.90462	8.70134	8.64772
ACAD9	27.4094	27.3381	28.1796	26.6713	26.3106	26.5677	25.8049	26.2106	26.4498	27.2743	27.9364	25.8849	27.9471	28.2369	25.6751
ACADL	0.135865	0.0428923	0.0655522	0.0968866	0.13153	0.183625	0.185933	0.200012	0.200844	0.159438	0.177618	0.138278	0.0878063	0.09264	0.13218
ACADM	22.4405	21.2077	20.6566	23.0728	22.9532	23.5421	21.1382	21.1382	19.7573	23.0419	21.2504	22.8905	21.3476	21.0047	20.8724
ACADS	9.95533	11.3666	10.0722	9.11093	9.91789	8.95937	7.90482	7.44051	8.78587	9.33216	9.88687	9.65068	7.8607	8.60208	8.96205
ACADSB	4.20579	4.32586	4.1572	4.90565	4.51856	4.57134	4.65233	4.88802	4.66467	4.71079	4.49735	4.62071	4.95715	4.52523	4.92787
ACADVL	194.737	201.245	195.822	167.812	170.474	167.784	162.992	164.623	163.841	151.183	157.147	153.77	165.695	166.657	170.303
ACAN	0.0582704	0.0508153	0.0448082	0.3172	0.378323	0.377715	0.52256	0.603751	0.598054	0.154767	0.135869	0.114197	0.403945	0.428478	0.446023
ACAP1	0.0336998	0.0567413	0.0325191	0.0480627	0.0391489	0.0303639	0.147578	0.0165368	0.0181153	0.0158188	0.029371	0.0342988	0.0522707	0.0306379	0.0819652
ACAP2	11.4074	10.9052	11.6421	10.4844	9.98145	10.0293	9.93993	10.4364	10.0484	10.1554	10.0332	9.89688	9.99681	9.52898	9.69163
ACAP3	19.0404	20.2457	18.9864	19.8396	19.5248	19.7769	17.4461	17.4097	16.3742	17.1011	19.3469	17.6663	16.5442	17.2048	16.3425
ACAT1	38.7516	36.4061	37.0088	38.8285	36.6012	37.7435	39.3944	39.715	39.6331	41.1752	41.0133	39.6969	38.4867	37.3496	37.6763
ACAT2	60.292	58.0315	59.4753	60.6971	62.9431	62.6766	64.5425	64.1319	66.3782	66.5296	67.0933	67.3626	63.2281	62.3828	61.1959
ACBD3	16.1162	14.9483	15.4729	15.9734	16.4163	16.7503	14.0679	15.2142	14.7432	15.8553	15.6186	15.4343	15.2189	14.2454	14.3299
ACBD4	4.72336	4.76398	4.46813	5.37517	5.62756	5.82674	4.9729	4.40879	4.54417	4.5607	4.49304	4.87986	3.93027	4.27996	4.39515
ACBD5	6.72646	6.63429	6.88616	6.00328	6.08799	6.41698	6.06064	5.93312	6.83744	5.91814	6.61864	6.08124	5.8505	6.33847	6.21565
ACBD6	19.0743	21.205	19.1456	17.7213	18.1939	18.4149	19.6022	18.645	20.2813	18.9601	20.6493	18.809	19.663	19.3922	19.7553
ACBD7	1.64136	1.5263	1.33579	1.24561	1.0905	1.13643	1.21985	0.937528	1.20469	1.04663	0.993044	0.972731	1.07669	1.02467	1.21574
ACCS	4.61685	4.63395	4.81649	4.94578	4.02481	4.94012	3.36795	3.02108	2.88517	3.55605	3.45589	3.67401	2.64165	2.88912	2.95571
ACCSL	0	0	0	0	0	0	0	0	0	0	0	0	0	0	0
ACD	7.93537	8.39745	8.36563	8.98674	9.056	9.25409	8.61738	8.57002	9.34433	9.01287	9.0926	8.64312	10.4927	10.0182	10.8708
ACE	0.171684	0.192218	0.204035	0.317468	0.296048	0.270911	0.180709	0.173986	0.183494	0.29037	0.26545	0.331225	0.210217	0.245224	0.229517
ACE2	0	0	0	0	0	0.0105741	0	0	0	0	0	0	0	0	0.0114235
ACER1	0.0441998	0.00371902	0	0	0.0457489	0.00306847	0	0	0	0.00690849	0	0	0.0456831	0	0
ACER2	0.410294	0.382436	0.367659	0.557181	0.601357	0.554445	0.433067	0.431403	0.598584	0.550312	0.536443	0.492236	0.363667	0.35972	0.441976
ACER3	9.94991	9.75645	10.1843	10.7123	10.9722	11.2173	9.99429	9.39001	9.46879	10.0746	9.29292	9.62305	9.43727	9.01448	9.31471
ACHE	0.275084	0.308277	0.272039	0.418115	0.532032	0.400444	0.276768	0.408933	0.355057	0.296595	0.429409	0.237592	0.362259	0.371376	0.492295
ACIN1	40.8971	42.7493	42.8937	40.4217	40.2105	40.2961	43.371	43.0017	44.6582	42.2429	43.3085	41.1258	41.2444	40.6871	41.9328
ACLY	103.039	103.846	107.486	102.331	104.251	104.441	102.16	102.182	102.81	105.449	104.966	105.853	107.695	109.852	109.488
ACMSD	0	0	0	0	0	0	0	0	0	0	0	0	0	0.0338822	0.0362529
ACN9	0.0419427	0.211843	0.22258	0.179526	0.308699	0.396902	0.206705	0.102922	0.248054	0.275588	0.0913694	0.277388	0.151786	0.133443	0.0815975
ACO1	12.8358	12.8865	13.7641	11.9889	12.8715	12.9517	11.7879	11.264	11.3786	10.7898	11.8065	11.4045	13.6097	13.1805	13.4269
ACO2	23.0676	22.1935	22.2602	21.8025	21.3004	20.889	19.156	19.3553	20.5226	20.944	21.3148	21.399	22.3403	21.4248	22.2798
ACOT1	1.33545	1.52211	1.75799	1.73447	1.711	2.01928	1.73775	1.92566	1.35664	1.73619	1.80551	1.83904	1.88401	1.614	1.40689
ACOT11	0.0429201	0	0.0377212	0.0408262	0.0403501	0.0117365	0	0.0210643	0.0280118	0.0122335	0.0373985	0.0437844	0	0.0582821	0.0208742
ACOT12	0.174195	0.0549879	0.0420178	0.144989	0.185577	0.0981238	0	0.106866	0.140488	0.0828874	0.113837	0.0664596	0.0450276	0.0593782	0.0847193
ACOT13	8.91138	9.76705	9.70229	8.14464	7.35663	8.03689	7.30407	7.05714	7.21934	8.08007	7.91687	8.24335	7.03863	6.50987	6.88837
ACOT2	6.10547	6.54616	5.71155	5.88471	5.99667	6.08566	6.12641	5.48625	5.50161	5.41457	6.17539	6.29716	6.25079	6.32694	6.55613
ACOT4	0	0.0458774	0	0.0259378	0.0422508	0	0.0298624	0	0	0.025575	0	0.0277159	0	0.0247683	0.0265031
ACOT6	0	0	0	0	0	0	0.0536721	0.0480346	0	0.0458454	0	0.0496443	0	0	0
ACOT7	77.9203	78.4025	77.0782	72.7901	72.3809	73.68	83.9648	82.6904	81.3216	82.1392	82.2814	81.618	96.1331	94.6438	97.4503
ACOT8	16.4709	18.2023	18.3372	17.3523	18.2957	17.047	16.4733	16.1372	14.6852	17.2966	17.9586	18.9899	16.524	16.6495	16.637
ACOT9	28.9129	29.7942	29.993	29.7449	29.2142	29.8125	30.5827	29.5109	30.7146	31.288	30.2348	30.8094	27.2909	27.1442	27.0017
ACOX1	7.13584	7.00723	7.19197	6.88316	6.61911	6.7787	7.00292	7.0044	6.94821	6.50749	6.43022	6.10486	7.08905	6.93817	7.09095
ACOX2	0.95939	1.40096	1.13937	1.15795	1.08609	0.997504	1.3333	1.08648	1.07118	0.727427	0.771774	0.9951	1.39265	1.50953	1.1846
ACOX3	6.53508	6.60703	7.20734	7.56377	7.70523	7.4307	7.40609	7.55346	7.00973	6.96533	6.41776	7.22037	7.19021	7.79536	7.40503
ACOXL	0	0.00376792	0	0.017024	0.0138666	0.0161319	0.019602	0.0351421	0.00192485	0.00420171	0	0	0	0.0561518	0.0406396
ACP1	53.3428	50.4659	52.3236	50.1473	50.2296	50.5729	54.4124	51.0462	53.02	50.3583	50.5501	51.4704	49.951	46.545	47.8467
ACP2	19.4003	19.1491	20.2864	17.8712	17.1425	17.792	16.832	14.9343	15.8379	15.7243	16.5126	18.6911	17.2728	17.5619	17.6236
ACP5	9.37836	9.29213	10.2422	3.06574	3.2868	3.8441	2.99472	2.55948	3.43114	3.76247	3.47242	3.86645	5.32641	6.66066	6.36595
ACP6	8.34048	8.34708	7.64911	9.43515	9.24431	9.55074	8.9508	8.63964	9.46522	8.53325	8.9564	8.26205	7.99664	8.06562	7.80537
ACPL2	3.76459	4.02866	3.90753	5.55723	6.04217	6.20046	4.9473	5.23211	5.28553	6.52346	6.41359	6.35734	6.3883	5.66196	5.62569
ACPP	1.6636	1.49871	1.55729	1.58955	1.23354	1.33905	3.38324	3.72546	3.67089	2.88625	2.32549	2.51973	2.2417	1.86048	1.94245
ACPT	0	0	0	0	0	0	0	0	0	0.031995	0	0	0	0	0.0331558
ACR	0	0	0.0322409	0	0	0	0	0	0	0	0	0	0	0	0
ACRBP	0.0462302	0.0194573	0.0446034	0	0.0358228	0.0833391	0.0253194	0.0907604	0.0248579	0.0433905	0.0201398	0	0.0477989	0.0210105	0.0224827
ACRC	0.313012	0.252552	0.251728	0.446257	0.323116	0.317207	0.314028	0.575923	0.448613	0.44085	0.329699	0.225721	0.242767	0.221362	0.2665
ACRV1	0.120606	0.0865292	0.193853	0.16292	0.12479	0.231379	0.0564588	0.157936	0.0865329	0.188539	0.0743913	0.204225	0	0.219125	0
ACSBG1	0.140329	0.189049	0.20315	0.159411	0.108654	0.139062	0.199686	0.0963852	0.165937	0.158115	0.134556	0.228587	0.203174	0.165879	0.204827
ACSBG2	0.0309487	0.0781657	0.0597307	0.0588444	0.0359487	0.0557655	0.0508179	0.0759308	0.049906	0.0581126	0.026975	0.0315019	0.0160015	0.0703451	0.1355
ACSF2	3.97016	3.85637	3.2599	4.46541	4.2138	4.62685	3.6576	4.08401	4.10455	4.17482	4.17506	4.60332	4.61831	3.93885	4.21496
ACSF3	4.34569	4.46628	4.21177	4.05866	4.45619	4.62111	4.33451	4.08797	4.29818	4.35228	4.5102	4.12983	4.29758	4.82144	4.95442
ACSL1	23.0489	22.8507	23.6681	16.718	16.1829	16.4804	16.4685	16.236	16.1181	17.4584	17.7759	17.7691	17.4902	18.3746	17.3729
ACSL3	57.3019	57.3441	56.6818	64.0157	62.3243	62.7027	67.3646	67.3375	68.7684	76.0762	72.616	74.7406	66.3735	63.4618	65.0706
ACSL4	26.3046	24.6089	26.1451	24.3831	23.0709	24.3989	24.1319	24.0898	23.5123	24.3672	23.3042	25.2062	24.1775	24.4777	24.0443
ACSL5	1.94715	2.06271	2.01983	1.68489	1.71557	1.51928	0.741039	0.869822	0.888026	0.774518	0.98741	0.714463	0.929396	1.15303	1.05422
ACSL6	2.18515	2.17462	1.94916	0.847841	1.07957	0.963588	0.44136	0.396831	0.382952	0.606256	0.546293	0.625448	0.53113	0.55602	0.609125
ACSM1	0	0	0	0	0	0	0	0	0	0	0	0	0	0	0
ACSM2A	0.196795	0.165683	0.135652	0.187063	0.174141	0.2406	0.1077	0.0965605	0.0604418	0.114382	0.147033	0.228953	0.058144	0.0766847	0.150449
ACSM2B	0	0	0	0.0167557	0.0273059	0.0317671	0	0	0	0.0165429	0	0	0	0.01602	0.00856574
ACSM3	0.0285195	0.0480079	0.0777356	0.190024	0.154649	0.232836	0.0661695	0.180181	0.0866276	0.0267621	0.149052	0.10247	0.147509	0.0915459	0.166399
ACSM4	0	0.0212752	0	0	0	0	0	0	0	0	0	0	0	0	0.0245821
ACSM5	0.140238	0.280392	0.262187	0.208355	0.380155	0.236927	0.201522	0.30968	0.075387	0.279762	0.24444	0.214085	0.253769	0.0956201	0.136432
ACSS1	67.8692	68.5409	68.7255	54.342	54.7396	54.0203	52.1453	52.238	53.8876	57.5891	59.3276	58.759	55.3568	56.5137	55.4103
ACSS2	24.8303	26.1629	24.8174	17.5985	17.1467	16.9686	21.1297	22.0475	22.3817	23.7858	23.2883	23.9064	20.2805	19.9134	19.6024
ACSS3	3.59275	3.74058	3.38964	6.71265	6.26414	6.70769	4.72777	4.33305	5.05599	5.61645	5.2833	5.56995	4.15485	3.82773	4.34971
ACTA1	0.0231142	0.0819482	0.0456957	0.0932434	0.144575	0.0845175	0.113452	0.139545	0.0243673	0.142471	0.108622	0.0320425	0.0527131	0.0362966	0.15796
ACTA2	13.4322	13.3206	13.2601	14.1695	14.6445	14.5932	9.04371	10.2648	10.871	11.3439	10.5564	10.0482	8.05021	8.69431	8.44588
ACTB	1895.37	1919.49	1905.03	1977.63	2016.37	1962.31	1908.29	1877.55	1892.35	2024.35	2081.36	2037.01	1911.92	1968.74	1950.35
ACTBL2	0.271353	0.272819	0.426087	0.357856	0.348942	0.404314	0.180405	0.136532	0.215424	0.211002	0.256149	0.322452	0.300052	0.12833	0.222568
ACTC1	0.0359908	0.0124449	0.0152413	0.00674847	0.0252521	0.0308199	0.00561919	0.00863731	0.00789815	0.0122285	0.00578253	0.0104617	0.0299586	0.0134836	0.00707576
ACTG1	1071.82	1115.1	1100.63	1225.44	1255.13	1218.77	1083.98	1071.58	1069.26	1208.54	1233.73	1210.99	1146.3	1160.83	1163.77
ACTG1P4	0.0799135	0.101022	0.0701706	0.0988633	0.0591388	0.129003	0.0786267	0.0294864	0.095371	0.0691469	0.103288	0.063782	0.0485007	0.0884929	0.0493419
ACTG2	0.775221	0.698706	0.581523	5.53428	6.3666	6.31179	2.52716	2.4546	2.57071	2.69494	3.3	2.31388	2.08245	2.02584	2.29832
ACTL10	0.191758	0.125549	0.205577	0.1216	0.115552	0.115215	0.0933394	0.125481	0.160378	0.139994	0.0556967	0.0216779	0.110151	0.116206	0.145075
ACTL6A	85.5054	83.5374	89.292	79.901	78.528	81.6492	92.2769	90.4949	87.7207	93.6589	90.4389	92.0514	84.4404	84.5763	86.4222
ACTL6B	0	0	0	0	0	0	0	0	0	0	0.0255573	0	0	0	0
ACTL7A	0	0	0	0	0	0	0	0	0	0	0.0276073	0	0	0	0
ACTL7B	0	0	0	0	0	0	0	0	0	0	0	0	0	0	0
ACTL8	0	0	0	0	0	0	0.0257043	0	0	0	0	0	0	0	0.0228235
ACTL9	0	0	0	0	0	0	0	0	0	0	0	0	0	0	0
ACTN1	101.65	103.637	102.257	122.019	126.211	123.029	135.381	135.929	133.62	126.826	131.136	123.951	132.994	135.893	134.164
ACTN1-AS1	0	0	0	0	0	0	0	0	0.108147	0	0.0869908	0	0	0	0
ACTN2	0	0	0	0.00851436	0.00173393	0.00807066	0.0114388	0.00395681	0	0	0	0.00152105	0	0.00101869	0.00473509
ACTN3	0.0331095	0.0339962	0.0136946	0.0134869	0	0.0127817	0	0.0301727	0.0152519	0.0399715	0.0123673	0	0	0.0145132	0.0138049
ACTN4	153.882	158.758	155.9	195.553	202.994	197.936	188.43	185.161	187.55	184.662	192.133	185.785	187.853	193.471	190.209
ACTR10	15.1003	15.2693	15.442	13.6814	13.3083	12.824	13.853	13.0484	13.6035	14.2411	14.2645	14.1537	12.4914	11.9923	12.3097
ACTR1A	44.0928	44.139	44.0796	37.9423	40.0497	39.9364	40.657	40.2684	40.429	41.289	41.2146	42.4517	44.8477	42.5691	42.9684
ACTR1B	30.88	30.8869	31.7671	26.5111	28.5952	27.0549	22.9631	22.8657	23.6596	26.414	28.9376	26.7671	21.5866	23.9695	23.2292
ACTR2	121.062	117.694	118.782	112.602	110.207	113.406	128.024	127.651	123.778	126.453	123.937	124.388	124.164	123.548	124.593
ACTR3	88.0025	85.6284	87.7718	88.6196	87.2773	88.7931	90.0662	90.6057	88.6539	91.5418	88.3499	90.3318	91.5793	88.1189	88.7828
ACTR3B	4.09435	4.53993	4.43865	4.80839	4.70218	4.71119	4.67251	4.46567	4.27016	4.81607	4.85092	4.7063	4.64256	4.96098	4.8542
ACTR3BP2	0	0	0.0331573	0	0	0	0	0	0	0	0	0	0	0	0
ACTR3BP5	0	0	0	0	0	0	0	0	0	0	0	0	0	0	0
ACTR3C	1.05398	0.905801	1.0805	1.111	1.22544	0.624286	0.857307	0.938068	0.967763	1.3147	1.18372	1.30769	0.797389	0.997104	1.26741
ACTR5	6.65558	6.80987	6.73523	6.15788	5.81544	6.0737	6.50191	6.43984	5.81609	6.18415	5.9047	6.90402	6.35274	5.91894	6.65769
ACTR6	17.4953	17.2877	16.92	16.8921	15.6749	17.7344	16.4919	17.6144	15.19	15.6798	17.0524	15.7329	16.0325	14.4146	16.575
ACTR8	18.3554	17.3492	17.9005	17.454	17.268	16.6655	18.0045	18.8445	18.0736	16.8317	16.7442	17.3404	17.3407	17.2159	17.0187
ACTRT1	0	0	0	0	0	0	0	0	0	0	0	0	0	0	0
ACTRT2	0	0	0	0	0	0	0	0	0	0	0	0	0	0	0
ACTRT3	0.0864163	0.018186	0.104223	0	0.0334768	0.0778842	0.0473228	0.106029	0.0232314	0.0405565	0.0752985	0.0879209	0.0223377	0.0785522	0.126086
ACVR1	16.2465	15.8619	15.6431	19.2114	19.4304	19.5861	17.1761	17.8446	18.2898	16.6203	16.6002	15.9773	17.5188	17.1025	16.699
ACVR1B	3.28947	3.09056	3.54108	3.67319	3.74656	3.58646	3.87969	3.95241	3.98034	3.92657	3.9577	3.85526	4.52441	4.13344	3.95984
ACVR1C	0.0235999	0.0193264	0.017463	0.0392365	0.0603788	0.0361697	0.0544186	0.0416758	0.0101423	0.017245	0.0394469	0.0240412	0.02339	0.0386371	0.0264161
ACVR2A	1.19136	1.04974	1.14988	1.2997	1.26097	1.39814	1.46306	1.43282	1.27204	1.38737	1.23984	1.08811	1.16057	1.09743	1.22681
ACVR2B	1.07066	1.07957	1.04687	1.4321	1.33244	1.35694	1.0155	1.09564	1.07963	1.04146	1.17246	1.16844	1.07511	1.07152	1.17782
ACVR2B-AS1	0.436386	0.240209	0.323921	0.303206	0.27297	0.272206	0.312376	0.428277	0.415022	0.31514	0.365704	0.307485	0.416532	0.335701	0.310252
ACVRL1	0.0197618	0.00831833	0	0.0281672	0.0225615	0.00859907	0.0108097	0	0.0106181	0.0278376	0.025845	0.0201236	0.0102172	0.0179705	0.0192314
ACY1	13.9222	14.323	16.2348	13.3514	13.9394	13.1396	12.3147	12.1789	11.9329	13.3406	14.1321	13.6353	13.5824	13.1725	12.7564
ACY3	1.45871	1.58687	2.05893	1.82993	2.09748	1.7009	1.20935	1.43245	1.26331	1.86909	1.05332	1.08479	1.06655	0.840457	0.622575
ACYP1	20.9956	22.0021	22.7847	27.4757	28.0567	25.7039	25.1565	23.3858	23.2353	22.8201	23.6396	24.8963	20.3494	25.1499	20.7465
ACYP2	7.93409	7.35393	6.32121	6.93828	7.5835	8.50655	6.22151	6.06041	6.47579	5.75255	5.77313	5.76423	4.91278	5.39731	5.77492
ADA	3.45971	3.6522	3.56372	3.96321	3.54608	3.11957	3.98439	3.82856	4.51007	4.3469	3.47316	3.99492	4.60731	4.71607	4.50463
ADAD1	0	0	0	0	0	0	0	0	0	0	0	0	0	0	0
ADAD2	0	0	0	0	0	0	0	0	0	0	0	0	0	0	0
ADAL	8.27568	7.84798	7.61874	7.231	6.99055	7.38886	6.2161	6.61042	6.42888	7.24159	6.34095	7.43977	6.51771	6.87299	6.5241
ADAM10	64.617	64.0239	64.9204	63.1019	63.3424	63.7213	51.8256	52.5629	52.8181	68.6873	65.5526	64.8681	54.444	52.3883	53.4868
ADAM11	2.63088	2.50276	2.38773	1.81553	1.93617	1.71259	2.35327	2.26437	2.61914	2.31615	2.2133	2.27494	2.58715	2.77022	2.66514
ADAM12	65.5166	62.8652	63.1263	63.8225	64.4056	65.9361	60.5549	59.4148	58.8223	71.1305	71.2507	69.5722	51.773	51.48	51.8858
ADAM15	23.3361	22.3421	22.5228	20.0338	20.4715	20.2122	18.986	18.1809	18.1868	20.3263	20.7636	19.2499	20.9038	20.4114	19.2911
ADAM17	20.3074	19.798	21.8332	19.5848	18.9109	19.4202	19.3974	19.8813	19.2388	20.4601	20.3074	21.0071	19.3204	18.0234	19.6934
ADAM18	0	0	0	0	0	0	0	0	0	0	0	0	0	0	0
ADAM19	14.1543	14.2377	14.1752	14.7082	15.0663	15.1762	16.9512	16.8151	16.6065	14.3376	14.37	14.6882	16.4772	15.8073	15.6974
ADAM1A	1.97743	1.637	1.78987	1.59523	1.81232	1.80356	2.01411	1.90685	1.9622	1.53857	1.52686	1.85805	1.90275	1.43207	1.74733
ADAM2	0	0	0	0	0	0	0	0	0	0	0	0	0	0	0
ADAM20	0.0149943	0.0252472	0.0434088	0.0142541	0.0116107	0	0	0	0.0161189	0	0	0.0152629	0	0.0136328	0
ADAM20P1	0	0.046131	0.0132193	0.065102	0.0424236	0.0493596	0.0149928	0	0.0441744	0.0128615	0	0	0.0708266	0	0.0133285
ADAM21	0.141997	0.159392	0.0913501	0.179996	0.101816	0.127932	0.172715	0.232256	0.203537	0.162938	0.123763	0.0963546	0.163148	0.1291	0.138152
ADAM21P1	0.105314	0.0886525	0	0.0601033	0	0.0189826	0.0692024	0.0826966	0.090595	0.0197706	0.0183534	0	0.0217782	0.0382926	0.0409764
ADAM22	5.74258	5.57009	5.73613	7.43273	7.53927	7.42604	5.93459	5.45573	5.90949	7.5672	7.03459	6.75615	5.6806	5.15646	5.54699
ADAM23	10.1275	9.88357	9.87873	21.425	21.1439	22.5441	18.6932	18.499	19.1137	19.2739	18.4996	19.7597	11.5864	11.4392	12.0161
ADAM28	0	0.0216544	0	0.0244464	0	0.0231698	0	0.0200297	0.0276477	0	0	0.0130924	0	0	0.03754
ADAM29	0	0	0	0	0	0	0	0	0	0	0	0	0	0	0
ADAM30	0	0	0	0	0	0	0	0	0	0	0	0	0	0	0
ADAM32	0.07691	0.0647496	0.0890616	0.0438695	0.0476452	0.124723	0.0841905	0.135859	0.115752	0.0722075	0.0413385	0.0156571	0.0477182	0.0978957	0.0149658
ADAM33	0.0119744	0.00984814	0	0	0.0185438	0.0107862	0	0	0	0.0112439	0.0104389	0.0487824	0	0	0.011652
ADAM3A	0	0	0	0	0	0	0	0	0	0	0	0	0	0	0
ADAM5	0	0	0	0	0	0	0	0	0	0	0	0	0	0	0
ADAM6	0	0	0	0	0	0	0	0	0	0	0	0	0	0	0
ADAM7	0	0	0	0	0	0	0	0	0	0	0	0	0	0	0
ADAM8	0.0961587	0.111457	0.108767	0.182803	0.174505	0.101522	0.125878	0.0519625	0.162908	0.105825	0.0937271	0.0788012	0.116551	0.0962958	0.12441
ADAM9	46.3677	45.8018	46.4702	61.4838	60.3121	61.0691	64.1396	63.3688	63.2877	53.8529	50.9747	54.1472	62.7559	61.3922	62.2823
ADAMDEC1	0	0	0	0	0	0	0	0	0	0.0180038	0	0	0	0	0
ADAMTS1	130.467	130.012	130.039	57.9328	57.5816	57.7058	43.2407	43.6348	42.4569	63.7506	63.3994	64.3535	53.6702	53.9513	53.233
ADAMTS10	0.0096097	0	0	0	0	0	0.0105143	0	0	0	0	0	0	0	0
ADAMTS12	0.163127	0.151089	0.283402	0.71288	0.632683	0.77893	0.928002	0.904294	0.885308	0.788959	0.924512	0.73099	0.548293	0.689822	0.730292
ADAMTS13	0.561665	0.584666	0.543813	0.621388	0.678305	0.576942	0.763813	0.800052	0.694444	0.531002	0.79782	0.72182	0.778006	0.415445	0.476851
ADAMTS14	0.252892	0.225687	0.229291	0.735102	0.640597	0.709674	0.553364	0.601576	0.485937	0.553629	0.548026	0.421177	0.919535	0.633816	0.797766
ADAMTS15	0.325604	0.39337	0.327937	1.55994	1.67058	1.65722	1.09952	0.951423	0.836722	1.18329	1.33933	1.08141	1.40555	1.4484	1.30893
ADAMTS16	2.94019	2.95438	2.50071	11.7748	11.9488	11.4614	9.40095	9.22807	9.51416	12.9466	12.471	13.0171	12.4738	12.0175	12.5367
ADAMTS17	0	0	0	0	0	0	0.00691364	0.00620102	0.00679195	0	0.00173116	0	0	0.00143707	0.0123035
ADAMTS18	0	0	0	0	0	0	0	0	0	0	0	0	0	0	0
ADAMTS19	0	0	0	0	0	0	0	0.00778097	0	0.00744778	0.0138296	0	0	0	0.00771825
ADAMTS2	0.00591177	0.00295828	0.0057062	0	0	0	0.00723929	0	0	0	0	0.00855808	0.00611417	0.000766666	0
ADAMTS20	0.0420316	0.076682	0.0540919	0.0399265	0.0596281	0.0630807	0.0383154	0.0756026	0.03764	0.0460536	0.054975	0.0642152	0.0362248	0.0318544	0.0954522
ADAMTS3	0.248188	0.203176	0.226243	0.10478	0.149371	0.111743	0.180994	0.229972	0.244481	0.200716	0.144274	0.154481	0.17825	0.131666	0.181166
ADAMTS4	3.66134	4.02345	4.14986	4.3083	5.14582	4.55721	7.83727	8.23504	7.24439	5.95968	5.8769	5.29638	6.57293	6.93506	6.78138
ADAMTS5	0.814291	0.807546	0.699116	0.524598	0.531815	0.445767	0.183478	0.200713	0.175867	0.538077	0.410378	0.48356	0.29625	0.23819	0.322623
ADAMTS6	0.0164431	0.0230766	0.0529052	0.052058	0.0850641	0.0894487	0.0539548	0.0967911	0.0706757	0.0669227	0.0573555	0.0390825	0.0510187	0.0398796	0.0426789
ADAMTS7	1.63778	1.74874	1.68568	2.38881	2.16377	2.26207	1.87512	1.70152	1.82563	2.05427	2.28255	2.05119	2.13715	2.13453	2.07959
ADAMTS8	0	0	0	0.0213029	0	0	0	0	0	0	0.0097715	0.0114126	0	0	0
ADAMTS9	147.464	148.142	148	111.096	109.921	112.564	98.0376	98.2325	97.9195	95.4446	95.1605	95.1376	129.202	127.234	128.513
ADAMTS9-AS2	0.24949	0.0807795	0.148144	0.182513	0.297322	0.190236	0.126089	0.0753454	0.103174	0.234201	0.117071	0.253879	0.0793763	0.0523393	0.261372
ADAMTSL1	0.577849	0.705484	0.714306	1.54047	1.74248	1.99207	1.11429	1.28168	1.26902	1.55207	1.63544	1.74458	1.23755	1.13313	1.13551
ADAMTSL2	0	0	0	0	0	0	0	0	0	0	0	0	0	0	0
ADAMTSL3	0	0.00063743	0	0	0	0	0	0	0	0.00029997	0	0	0	0	0
ADAMTSL4	0.374698	0.294284	0.383786	0.324358	0.580926	0.507859	0.382496	0.500134	0.541907	0.399907	0.276973	0.324131	0.417733	0.436559	0.476916
ADAMTSL5	0.862913	1.03432	0.733928	1.11225	0.985263	1.09362	0.816466	0.717645	0.849009	0.98869	0.841389	0.714627	0.952821	0.930845	0.896513
ADAP1	1.94362	1.80601	2.017	0.784638	0.923158	0.908736	0.722762	0.57588	0.571716	0.826224	0.830939	0.839695	1.13759	0.91681	1.07027
ADAP2	0.167734	0.090719	0.132434	0.18845	0.200733	0.24728	0.0834591	0.149645	0.13114	0.100214	0.106327	0.0931285	0.141913	0.18023	0.14836
ADAR	30.1752	29.9914	30.3139	28.4541	28.6774	29.5935	28.9109	29.284	29.1125	27.1071	27.8044	27.7217	28.6053	28.498	29.2809
ADARB1	2.98441	2.8954	3.15792	3.6055	3.77718	3.58387	2.67915	2.34194	2.72334	2.94956	2.89606	3.08771	3.59653	3.34964	3.20495
ADARB2	0	0	0	0.000279466	0	0	0	0	0	0	0	0	0	0	0
ADARB2-AS1	0	0	0	0	0	0	0	0	0	0	0	0	0	0	0
ADAT1	7.4617	7.12421	6.97264	5.9551	6.29067	6.08951	6.72053	6.89958	6.79721	6.74026	6.3281	5.99727	7.13685	6.42206	6.73589
ADAT2	0.966723	1.04313	0.926917	0.966905	0.916449	0.962716	0.924392	0.84167	1.05947	1.11237	0.965789	0.971633	0.734962	0.747221	0.716584
ADAT3	2.32795	2.14235	2.79872	2.26619	2.18518	2.24635	2.45914	1.93459	2.7083	2.10605	2.2649	2.28233	2.20705	2.66145	2.95433
ADC	0.510638	0.595196	0.454811	0.410928	0.456421	0.584058	0.3226	0.501194	0.253409	0.313413	0.496329	0.519605	0.385844	0.339222	0.458526
ADCK1	2.76773	2.57776	2.05657	2.52281	2.35464	2.24696	2.40953	2.15739	2.03696	1.97583	2.03862	2.25868	2.18674	2.52035	2.2072
ADCK2	13.3697	12.8342	14.0429	14.702	15.5956	15.4057	13.4049	13.5052	14.3422	14.7843	15.1978	14.7283	16.6424	15.7883	15.7583
ADCK3	7.6028	7.7939	7.6948	6.79309	7.36676	7.31174	4.73074	5.20726	5.07541	6.95076	7.26114	6.75203	5.76742	5.84914	5.30172
ADCK4	8.36335	9.32972	9.23915	10.7835	9.38846	9.0646	7.97989	8.06556	8.10612	9.21149	9.2037	8.99389	8.19415	8.56196	9.00082
ADCK5	5.17683	4.89779	5.12998	4.9772	4.90244	4.7855	4.39793	4.3323	5.06731	3.89346	4.45287	4.1864	4.76225	4.45092	4.88477
ADCY1	0.0723951	0.0768667	0.0820361	0.203244	0.228875	0.207214	0.261598	0.324219	0.328045	0.142211	0.159217	0.141101	0.192077	0.188954	0.189965
ADCY10	0	0.0205504	0	0.00772834	0	0	0	0.015964	0	0	0.00709299	0	0	0.0147967	0
ADCY10P1	0.0976498	0.156967	0.179927	0.126512	0.144321	0.231845	0.20396	0.139398	0.124026	0.116712	0.185759	0.171768	0.137711	0.153384	0.146868
ADCY2	0.0548927	0.0256789	0.0588708	0.202763	0.193489	0.208691	0.166786	0.149596	0.144189	0.120295	0.148918	0.0994015	0.018924	0.0277352	0.0178091
ADCY3	26.1691	26.9692	27.0299	27.7318	28.0907	26.7633	26.1102	26.318	26.5867	28.0665	28.8921	28.079	26.8455	27.6494	27.3254
ADCY4	0	0	0.0465916	0	0.0170706	0.0297944	0.0132072	0.0118423	0	0.0339983	0	0.0122872	0.0124803	0.0329233	0
ADCY5	0.170842	0.143853	0.174779	0.4806	0.500799	0.431918	0.345006	0.286378	0.313493	0.155773	0.295095	0.227552	0.346582	0.310754	0.390114
ADCY6	7.38468	7.45884	7.71046	9.22319	8.96391	9.47294	7.47635	7.50518	7.58448	7.92356	7.58006	7.74459	7.29873	7.34012	7.34591
ADCY7	0.535165	0.401168	0.60474	0.700517	0.525198	0.622931	0.713897	0.633903	0.547034	0.594559	0.49511	0.631516	0.472485	0.658839	0.565335
ADCY8	0	0	0	0	0	0.00895759	0	0.000975894	0	0	0	0	0	0.00904429	0
ADCY9	5.76377	5.78944	5.74229	4.98702	5.24571	4.59183	4.63234	4.64485	4.81644	5.1525	5.05767	5.18462	4.69976	4.92387	5.10421
ADCYAP1	0	0	0	0	0	0	0	0	0	0	0	0	0	0	0
ADCYAP1R1	0.273756	0.334321	0.386459	0.0354532	0.038509	0.0560183	0.0272162	0.0181044	0.0334231	0.0175251	0.0976579	0.0887186	0.0514724	0.0622388	0.0242169
ADD1	54.0167	53.7246	52.4347	45.8285	47.617	44.7799	54.5663	53.69	53.7279	55.5455	55.1912	54.9448	56.8949	57.5329	56.0546
ADD2	0.011096	0.00934169	0.0104408	0	0	0	0.0721374	0.0993229	0.0814019	0	0.0187121	0.0220325	0.0223768	0.00983723	0.0105274
ADD3	14.3741	14.5175	14.1909	17.3731	17.3359	17.6197	15.7108	15.7457	15.7582	17.0946	16.8139	17.0319	15.2881	14.8715	15.5748
ADGB	0.0132339	0	0	0	0.00171944	0	0.000757619	0.00124572	0	0.00345796	0.00664245	0	0.00157572	0.00185572	0.030465
ADH1A	0	0.0252903	0	0	0	0	0	0	0	0	0	0	0	0	0
ADH1B	0	0	0	0	0	0	0	0	0	0	0	0	0	0	0
ADH1C	0	0	0	0	0	0	0.0336408	0	0	0	0	0	0	0	0
ADH4	0.0218977	0	0	0.0416606	0	0.019736	0.0239835	0	0.0235475	0	0.0190802	0	0.0226412	0.0199047	0.0212997
ADH5	54.006	53.6907	53.1861	48.21	46.7361	47.6994	54.5	55.3085	56.3412	56.9805	56.1928	58.3658	54.3233	51.3165	52.5901
ADH6	0	0	0	0.0310235	0	0	0	0	0	0.0305678	0.0283736	0.0331203	0	0	0.0316769
ADH7	0	0	0	0	0	0	0	0	0	0	0	0	0	0	0
ADHFE1	0.758716	0.870897	0.665473	1.07177	0.962031	1.20194	0.805878	0.677057	0.667568	0.88475	0.921477	1.09929	0.808234	0.66874	0.7156
ADI1	64.8676	65.1676	63.5488	73.4293	73.9978	74.375	69.6395	70.7659	70.508	69.1896	70.7934	69.6158	66.081	66.5904	65.4579
ADIG	0	0	0	0	0	0	0	0	0	0	0	0	0	0	0.0674161
ADIPOQ	0	0	0	0	0	0	0	0	0	0	0	0	0	0	0
ADIPOQ-AS1	0	0	0	0	0	0	0	0	0	0	0	0	0	0	0
ADIPOR1	35.5929	36.0887	33.5809	30.9596	30.1671	30.069	31.686	32.0737	31.9055	33.2732	33.2754	32.4828	33.2523	32.1354	33.0068
ADIPOR2	18.3574	17.9802	18.3918	23.7687	22.9258	22.6214	23.6902	23.9775	23.0293	24.7276	24.2065	24.8808	23.6313	23.983	24.6627
ADIRF	1.64555	2.33811	2.43548	2.33855	2.36326	1.82975	1.76281	1.65766	2.79045	2.05163	2.56227	2.19837	1.74082	2.97781	2.04416
ADK	18.3357	15.774	15.3499	14.3329	15.2454	16.5177	17.9351	16.2415	17.2684	16.7911	16.6389	17.1004	15.6566	15.4071	16.289
ADM	19.5241	19.9343	21.2478	36.2047	36.8419	36.9205	31.4835	33.3634	31.7752	34.7886	37.2786	35.0709	32.5238	33.7489	33.8909
ADM2	0.151882	0.0882185	0.13797	0.0962113	0.117559	0.102943	0.12187	0.119222	0.043529	0.114099	0.105932	0.0927948	0.115185	0.0460369	0.0741528
ADM5	0.957105	0.805696	1.10033	0.890949	0.836122	1.21123	1.24885	1.27922	1.55466	1.14691	1.18892	1.03602	0.926461	1.24027	1.04988
ADNP	29.9872	31.2332	31.5053	31.9552	30.8111	31.6327	33.4475	34.5269	34.3053	33.9299	33.5928	35.0308	33.1783	32.5597	32.6672
ADNP2	6.26299	6.5825	6.83126	7.89176	7.96963	8.17035	7.93876	8.24929	8.15207	7.93373	7.91776	7.59669	8.45598	7.89111	8.02303
ADO	24.3737	24.703	24.0334	22.2198	22.0151	22.7369	23.1159	23.5814	23.7467	25.659	25.7063	26.4662	25.2098	24.3468	24.0935
ADORA1	0.621214	0.716919	0.721376	1.24001	1.31977	1.19374	0.985444	0.934031	1.02925	1.16966	1.22977	1.25615	1.11457	1.11355	1.03997
ADORA2A	0.558775	0.539595	0.570921	0.343758	0.30546	0.251724	0.305862	0.193548	0.265026	0.231436	0.0859426	0.11709	0.356877	0.358597	0.415719
ADORA2A-AS1	0.0656824	0.0552961	0.01743	0.0624483	0.0135115	0.0147947	0	0.0161153	0.0444171	0	0.0304122	0.016713	0.0339595	0.0447867	0.0159756
ADORA2B	33.6757	33.0583	32.7138	40.1573	41.2389	42.3825	34.4804	34.4188	34.7125	32.367	31.2655	33.3405	33.5271	32.4175	32.9568
ADORA3	0.0597405	0	0.11778	0.0568925	0	0.107764	0.0654955	0.117324	0.0438135	0.150279	0.0708786	0.184803	0.252471	0.0346011	0.155731
ADPGK	43.7204	42.4555	42.413	41.9999	40.1323	41.0808	40.8681	40.1845	40.3847	43.0059	41.7684	40.9907	39.235	38.2248	39.5731
ADPGK-AS1	1.30591	1.24171	1.46777	1.41676	1.6061	1.76019	1.24453	1.38713	1.37085	1.45685	1.62032	1.61076	1.46161	1.08954	1.25563
ADPRH	4.02761	4.17822	4.07206	3.13278	3.42416	3.53068	2.30876	2.35248	2.4609	3.10652	2.89455	2.81922	2.71473	2.6486	2.99769
ADPRHL1	0.416643	0.278319	0.474204	0.381235	0.583366	0.533364	0.511163	0.47122	0.487291	0.555353	0.399985	0.30827	0.361518	0.444943	0.680462
ADPRHL2	19.8331	19.3586	19.8658	17.6041	18.3332	18.0214	18.1752	18.6741	19.9244	19.0547	19.7166	20.4377	21.3098	19.8328	19.6953
ADPRM	2.54854	2.29463	2.68715	2.2004	1.86104	1.65672	2.20849	2.32762	2.61398	2.39139	2.29723	2.47082	2.02199	2.66608	2.70869
ADRA1A	0	0	0	0	0	0	0	0	0	0	0	0	0	0	0
ADRA1B	0.0252627	0.0319003	0.0182822	0.148652	0.176117	0.170736	0.12448	0.059353	0.0814871	0.106717	0.0674221	0.155623	0.235096	0.212564	0.223024
ADRA1D	0	0.0132719	0	0	0.0122079	0.0284061	0	0.0154711	0.0338951	0.0444013	0	0.016046	0.032603	0.0286654	0.0153378
ADRA2A	0	0	0	0.0301191	0	0.00951598	0.046244	0.0622026	0.0227113	0.0198426	0.0276333	0.0322749	0	0	0.0102816
ADRA2B	0.0379986	0.0319923	0.0488948	0.0361148	0.00980598	0.0342285	0.0415863	0.0124292	0.0408444	0.0594651	0	0.0386861	0.0261967	0.023034	0
ADRA2C	0	0	0	0	0	0	0	0	0	0	0	0.0225462	0	0	0
ADRB1	0.0729902	0.0737406	0.0563495	0.0555075	0.0678208	0.0394536	0.0319578	0.0429774	0.0470781	0.0137059	0.0254485	0.02972	0.0301912	0.0132727	0.028407
ADRB2	0.422868	0.249177	0.265205	0.683784	0.622471	0.533549	0.486274	0.767874	0.613859	0.436616	0.552708	0.494781	0.327923	0.307513	0.390764
ADRB3	0	0	0	0	0	0	0	0	0	0	0	0	0	0	0
ADRBK1	26.7852	28.0334	26.7393	26.7694	28.8147	26.5064	26.4572	26.0016	26.5262	28.4216	27.7113	27.6246	30.8431	31.4729	31.4512
ADRBK2	0.0393596	0.0405088	0.054878	0.220121	0.235	0.251995	0.282192	0.275195	0.249051	0.151983	0.160181	0.147021	0.14474	0.156121	0.16176
ADRM1	125.471	129.971	124.323	111.586	119.19	113.588	118.959	114.675	118.971	119.692	130.418	123.89	134.108	142.016	136.59
ADSL	31.9864	32.0132	31.0287	28.2577	29.9395	30.2594	35.1599	36.6267	33.5859	34.2719	33.3256	33.6738	33.397	32.4085	33.712
ADSS	23.9488	23.2404	23.2436	21.4573	21.3051	21.63	25.0947	23.9731	24.1108	23.3045	22.2651	23.4992	24.3524	23.4529	23.821
ADSSL1	0.150467	0.147768	0.120977	0.453409	0.580385	0.361722	0.384652	0.344672	0.296695	0.353052	0.305883	0.153054	0.155575	0.22794	0.219512
ADTRP	0.121526	0.0818332	0.0468946	0.0462469	0.0188311	0.0438139	0.0532467	0.0238536	0.0522738	0.0912434	0	0.0494422	0.050254	0.0883636	0.0709143
AEBP1	0.69981	0.858583	0.492082	0.721945	0.967247	0.93641	2.40653	2.34445	2.22416	1.53024	1.58631	1.79171	1.03388	0.836376	0.885329
AEBP2	4.90449	4.90224	5.27234	5.11375	5.00487	4.88579	4.7163	5.20498	4.84312	5.10666	5.21491	4.98286	4.90947	4.58048	4.73092
AEN	14.7283	15.9365	15.8889	17.3668	18.0482	18.2373	22.2916	21.6468	21.8504	19.0736	18.5205	18.7007	22.0538	21.7771	21.4899
AES	165.079	164.022	163.729	144.552	149.529	145.321	158.235	155.339	153.553	156.419	158.941	156.144	160.278	163.658	160.593
AFAP1	12.7721	13.0354	13.1556	13.5744	13.9043	13.605	13.4495	13.2877	13.3157	12.7345	13.1512	12.5369	13.9935	13.9954	14.0418
AFAP1-AS1	0.035255	0.0395817	0.011343	0.0390667	0.040917	0.0264534	0.0321349	0.00576466	0.0315698	0.0331116	0.0358665	0.0119704	0.0141797	0.0374075	0.00571903
AFAP1L1	4.74403	4.92091	4.77832	4.5204	4.63602	4.63308	6.68647	6.24979	6.67204	5.85696	5.71979	5.54911	5.32809	5.54859	5.665
AFAP1L2	28.2458	28.8336	29.2232	28.0445	28.7935	28.594	24.4822	25.0461	24.6893	33.7102	32.7392	31.1914	17.2089	18.1651	18.7588
AFF1	5.30219	5.2643	5.38463	4.51342	4.76652	4.72805	4.37776	4.50014	4.3357	4.14505	4.12464	4.08479	4.5585	4.42568	4.39275
AFF2	0.0064087	0.011556	0.0123733	0.018258	0.0135703	0.00866047	0.00350399	0.0157177	0.00267569	0	0	0	0.00662843	0	0.00311905
AFF3	1.5254	1.35033	1.51371	0.803482	0.665827	0.669464	2.00527	1.73939	1.82109	0.752364	0.864848	0.920824	0.8499	0.920745	0.860552
AFF4	6.17574	5.94	6.11667	6.70019	6.40322	6.3518	6.79469	6.5324	6.55145	6.10021	5.65579	5.99501	6.32334	6.05257	6.0636
AFG3L1P	7.3369	6.91863	6.98541	7.24891	7.66778	6.96223	7.57612	6.83491	6.15715	6.81177	6.73386	6.17151	6.52957	5.92325	7.04784
AFG3L2	57.8468	55.5426	56.2937	56.7008	56.6215	55.2038	55.4613	53.665	54.3815	58.5599	59.5742	57.1698	59.2014	59.042	60.0958
AFM	0	0	0	0	0	0	0	0.0425545	0.0233096	0	0	0	0	0	0
AFMID	5.32927	5.35553	4.75878	5.6676	6.26396	6.24971	4.88943	5.49043	5.09309	6.5393	6.94696	6.42904	5.63921	4.83346	4.65787
AFP	0	0.0178961	0	0.0404442	0	0.0191602	0	0	0	0	0	0	0	0	0
AFTPH	11.0651	11.1118	10.9225	10.4138	9.81241	10.0129	9.47324	9.64896	9.63012	9.10232	9.89678	9.20896	9.92932	9.18481	8.94665
AGA	16.6382	15.2318	15.2978	14.506	14.8352	14.3648	12.8269	13.2279	13.6513	13.8188	12.9932	14.6169	13.3262	13.5278	14.0358
AGAP1	3.80615	4.66114	4.15336	4.33725	5.0085	4.61261	4.4735	5.11805	4.81331	4.53107	4.59778	4.42417	5.63971	6.1892	5.08416
AGAP11	0.234286	0.275751	0.229702	0.227651	0.310816	0.275357	0.326459	0.250537	0.323999	0.229534	0.224289	0.265516	0.165637	0.238573	0.203093
AGAP2	0.0800029	0.203628	0.164762	0.428324	0.354353	0.360931	0.478913	0.507784	0.481655	0.337079	0.387241	0.381412	0.322263	0.51452	0.347921
AGAP3	36.9605	37.058	36.3219	32.3374	34.1431	33.5946	34.4758	33.9403	34.9992	35.3729	37.4096	37.2948	42.1242	42.3104	41.0296
AGAP4	2.7846	2.66545	2.34757	2.54507	2.65784	2.5047	2.65279	2.54587	3.08826	2.21235	2.33563	2.13231	1.8184	1.91544	1.77073
AGAP5	1.77605	2.12028	1.5972	1.67214	2.12618	1.60728	1.75214	1.83098	2.02639	1.41557	1.38439	1.32247	1.43671	1.37736	1.42144
AGAP6	3.23516	2.86897	2.86464	3.41296	3.46888	3.39722	3.59273	3.43389	3.37421	2.80889	2.99196	2.8737	2.35685	2.79188	2.57713
AGAP7	1.53672	1.4286	1.19772	1.25891	1.60399	1.45391	1.42813	1.34395	1.72478	1.19844	1.04733	1.28943	0.843987	1.07834	0.911214
AGAP8	2.41508	2.27571	2.22604	2.22337	2.61515	2.42301	2.2561	2.20368	2.88488	1.80004	2.12199	1.94637	1.78256	1.80613	1.58809
AGAP9	1.05838	1.12314	1.28142	1.23564	1.28833	1.35346	1.29501	1.12457	1.4317	1.06402	1.23512	0.910003	1.02183	1.10678	1.01273
AGAP9	1.12632	1.22444	1.39461	1.33108	1.41812	1.45259	1.43421	1.24994	1.59071	1.17208	1.29464	0.989877	1.10499	1.20655	1.07226
AGBL1	0	0.00165547	0	0.00280104	0	0	0.00389659	0	0	0	0	0	0	0	0
AGBL2	0.583478	0.366038	0.507904	0.456637	0.495954	0.546158	0.488267	0.505182	0.491876	0.397486	0.388977	0.465952	0.425928	0.374513	0.445318
AGBL3	0.104828	0.163035	0.168613	0.0996212	0.0901654	0.104912	0.152954	0.14858	0.100154	0.0984325	0.0609235	0.0948732	0.0963609	0.0317733	0.0566703
AGBL4	0.0557407	0.00497729	0.0134479	0.0662296	0.0230242	0.0941515	0	0.02735	0.0299594	0.0130839	0	0.0638367	0.0504361	0.0380109	0
AGBL5	17.6022	17.9946	18.7249	17.1887	18.86	17.8937	19.9809	21.4147	20.3089	19.0844	19.6965	20.4904	20.35	21.8037	21.4147
AGER	2.49919	2.58928	2.89788	3.11707	3.07323	2.97109	2.65862	3.0798	2.52938	3.11071	3.2141	2.99286	2.55543	2.91204	2.78699
AGER	0	0	0	0	0	0	0	0	0	0	0	0	0	0	0
AGER	0	0	0	0	0	0	0	0	0	0	0	0	0	0	0
AGER	0	0	0	0	0	0	0	0	0	0	0	0	0	0	0
AGER	0	0	0	0	0	0	0	0	0	0	0	0	0	0	0
AGER	0	0	0	0	0	0	0	0	0	0	0	0	0	0	0
AGER	0	0	0	0	0	0	0	0	0	0	0	0	0	0	0
AGFG1	13.4316	12.9303	13.1513	12.5681	11.914	12.2053	12.0588	11.8552	11.541	12.2971	11.4239	11.6855	12.0408	11.4456	11.7708
AGFG2	5.7386	6.21522	6.02016	5.31327	5.37605	5.40002	5.21686	5.54505	5.53586	5.31532	5.45555	5.11753	6.16659	6.47345	6.1754
AGGF1	10.855	10.2113	10.2277	10.9406	10.3103	11.2056	11.1208	10.9275	11.379	10.5095	10.5502	10.379	10.1491	9.67759	9.43665
AGK	18.3512	18.777	18.191	20.8868	20.5685	20.5826	19.2396	20.6254	20.6467	20.2154	20.5076	21.3344	18.9915	19.2004	20.288
AGL	4.654	4.97499	4.63506	4.99235	5.10915	5.27159	4.14989	4.37778	4.26692	4.72214	4.76206	5.00828	4.14081	4.19048	3.99099
AGMAT	0.696875	0.608856	0.659832	0.424909	0.325756	0.319798	0.23025	0.116125	0.212004	0.370372	0.424082	0.294492	0.190359	0.239108	0.12794
AGMO	24.4469	24.1645	25.2069	16.4989	15.6501	15.6809	20.4948	20.8889	20.4383	23.9538	23.0049	22.3407	16.835	17.252	16.5267
AGO1	10.5707	10.4743	10.698	9.43813	9.46337	9.57681	9.54744	8.94236	9.49556	9.59166	9.3828	9.48831	10.6011	9.96775	10.2077
AGO2	10.0351	9.63502	10.0522	11.56	12.0647	11.3802	11.7027	12.562	11.6778	11.2212	11.0147	11.5182	12.4244	13.5574	12.6498
AGO3	3.12107	2.66575	2.83815	3.03591	2.85452	2.83826	3.11944	2.81931	2.79954	2.76142	2.27887	2.60424	2.93633	2.9458	2.43701
AGO4	3.12122	3.38593	3.07449	2.59619	2.50379	2.36583	2.55735	2.35755	2.55488	2.51422	2.46732	2.29765	2.26044	2.34218	2.22075
AGPAT1	41.7725	41.8486	43.3301	43.3102	44.8834	43.6355	40.4418	38.7897	39.6963	40.2198	41.3847	39.9715	42.3791	43.7441	44.4705
AGPAT1	0	0	0	0	0	0	0	0	0	0	0	0	0	0	0
AGPAT1	0	0	0	0	0	0	0	0	0	0	0	0	0	0	0
AGPAT1	0	0	0	0	0	0	0	0	0	0	0	0	0	0	0
AGPAT1	0	0	0	0	0	0	0	0	0	0	0	0	0	0	0
AGPAT1	0	0	0	0	0	0	0	0	0	0	0	0	0	0	0
AGPAT1	0	0	0	0	0	0	0	0	0	0	0	0	0	0	0
AGPAT2	19.9949	17.6581	18.6196	20.3607	21.3586	19.273	17.9559	16.7487	17.2258	20.591	21.297	17.3256	19.2434	19.672	18.1437
AGPAT3	26.5779	26.4845	26.0145	19.7644	20.3615	19.1085	22.5621	22.7985	22.0019	22.4695	22.6473	23.0733	24.9733	24.9545	26.0466
AGPAT4	0.923086	0.96843	1.06142	0.953344	1.06931	1.15357	1.03719	1.13323	1.15719	1.03755	1.01501	1.06193	1.04861	1.01847	1.13906
AGPAT4-IT1	0.2597	0.119238	0.091112	0.112309	0.14636	0.0638419	0.129308	0.0463507	0.228507	0.132951	0.205696	0.168115	0.12205	0.0643773	0.206664
AGPAT5	21.7468	21.29	21.6089	25.082	24.3288	24.3604	25.5304	26.0555	25.7429	25.4679	24.1898	24.6778	24.7821	23.95	24.2436
AGPAT6	28.9705	30.5616	29.7392	31.9608	32.382	31.4183	28.6448	28.6935	28.4677	30.6467	30.5169	29.9748	29.9551	29.7085	29.1964
AGPAT9	28.2465	26.4907	28.3709	28.1305	26.5195	27.3253	31.8636	31.8828	31.1137	21.9628	21.2622	21.1	29.8925	28.7734	28.283
AGPHD1	2.00256	1.71293	1.9332	2.61015	2.48897	2.7747	1.7783	2.01224	2.13582	2.81937	2.39923	1.47526	2.02662	1.56657	2.25106
AGPS	12.486	12.3536	12.2813	13.9521	12.9645	13.3474	13.0621	12.6047	12.434	12.813	12.2584	13.2834	12.7085	12.7849	12.5914
AGR2	0	0	0	0	0	0	0	0.049347	0	0	0	0	0	0	0
AGR3	0	0	0	0	0	0	0	0	0	0	0	0	0	0	0
AGRN	77.4264	82.3806	79.8121	55.3052	58.8131	54.704	51.3836	49.0186	49.7561	50.8717	53.9772	50.3493	63.1139	66.7272	64.1884
AGRP	0	0	0	0.0670818	0	0	0	0	0	0	0	0	0	0	0
AGSK1	4.09488	3.87321	3.45987	3.43224	3.54982	3.18091	3.56564	3.32981	3.00119	2.92795	3.41907	3.08918	3.11479	3.82284	3.78195
AGSK1	3.12164	2.91535	2.53312	2.53959	2.66265	2.38768	2.71803	2.44559	2.28816	2.11951	2.57752	2.54717	2.27211	2.89039	2.77022
AGSK1	4.00041	3.80787	3.41311	3.28448	3.37037	3.03305	3.4266	3.15252	2.86576	2.74637	3.31175	3.18881	3.05935	4.00162	3.68384
AGT	0	0.0274963	0	0	0	0	0	0	0	0	0.0142331	0	0	0	0
AGTPBP1	8.3848	8.15916	8.32403	7.97525	7.47852	7.90734	7.25255	8.55177	8.17149	7.71574	7.83951	7.83652	7.68254	7.46608	8.17785
AGTR1	0.216557	0.380523	0.163103	0.0357212	0.0445472	0.0863766	0.0209831	0.131715	0.0618333	0.0899794	0.100239	0.0918214	0.0792878	0.0498189	0.0372929
AGTR2	0	0	0	0	0	0	0	0	0	0	0	0	0	0	0
AGTRAP	19.9857	18.7131	19.0888	18.8834	17.6137	18.0037	15.4833	15.368	14.9736	18.8275	17.7033	17.076	17.6573	17.8455	17.5383
AGXT	0	0	0	0	0	0	0	0	0	0	0	0	0	0	0
AGXT2	0	0	0	0	0	0	0	0	0	0	0	0	0	0	0
AGXT2L1	0.892735	0.888175	0.880948	0.463133	0.345793	0.402243	0.266626	0.139383	0.308317	0.325075	0.21216	0.206444	0.40252	0.353957	0.400053
AGXT2L2	3.9101	4.32231	4.64328	4.02589	5.24325	4.43407	3.67063	3.90127	3.55774	4.27513	4.23075	4.52467	2.95442	3.10511	2.96746
AHCTF1	5.81836	5.72231	5.63707	5.8196	5.77997	6.02128	6.95187	6.64432	6.79208	6.17299	5.92305	6.02876	6.3654	6.28012	6.37154
AHCTF1P1	0.143268	0.115662	0.109657	0.0986613	0.0731442	0.126411	0.106699	0.132242	0.161819	0.129518	0.134918	0.135526	0.145247	0.144111	0.112813
AHCY	77.9916	79.6363	80.2818	77.1387	79.7068	79.711	92.6286	89.1313	91.8799	85.0243	87.5976	85.6382	106.636	105.143	104.062
AHCYL1	34.5793	35.1177	33.8395	35.8921	34.5339	34.5524	34.2473	34.4306	34.5208	36.9645	35.2005	35.9303	35.164	34.6225	34.6868
AHCYL2	7.20977	7.31176	6.94835	5.81052	5.75103	5.8879	5.95645	6.03654	5.58237	5.78541	5.83972	5.47782	5.80112	5.79519	6.18904
AHDC1	4.38202	4.31432	3.9623	3.67118	3.55727	3.45619	3.40638	3.17002	3.3735	3.13292	3.34706	3.19507	3.8064	3.97972	3.96653
AHI1	5.31351	4.47281	4.71835	4.26616	3.91588	4.5422	4.44552	4.42621	3.6722	4.47917	4.26135	4.38842	4.37466	4.3223	4.24167
AHNAK	65.8513	64.4593	64.5831	78.1846	75.4221	77.6696	62.7137	63.9004	63.7315	66.0064	67.6629	68.7057	74.9556	77.2319	76.0262
AHNAK2	0.173008	0.192456	0.206182	0.407627	0.401457	0.33456	0.331644	0.314286	0.341922	0.220697	0.24031	0.258974	0.525782	0.531354	0.561387
AHR	53.4408	52.2983	53.7303	55.6848	53.9948	56.349	52.2116	53.5478	53.8419	52.4107	51.5981	51.277	64.8716	64.2893	63.6408
AHRR	19.361	19.7298	19.582	17.7931	19.689	19.0916	18.4854	17.612	17.3258	18.3566	20.1331	18.7258	17.2675	17.351	18.031
AHSA1	80.1154	79.3941	79.792	76.9902	75.7911	80.6273	76.0026	78.5515	77.7626	82.5158	84.3268	82.9734	74.7035	72.4721	76.988
AHSA2	17.8553	17.4598	17.9406	24.7175	24.8017	23.4874	19.7957	19.9435	20.135	20.3315	19.7387	19.4248	13.0836	14.6605	14.3352
AHSG	0	0	0	0	0	0	0	0	0	0	0	0	0	0	0
AHSP	0	0	0	0	0	0	0	0	0	0	0	0	0	0	0
AICDA	0	0	0	0	0	0.00511288	0	0	0	0	0	0	0	0	0
AIDA	27.5867	28.3954	28.2587	30.1855	28.3077	29.1979	30.3994	30.7504	31.0174	29.7201	28.8671	28.4533	29.57	28.7409	27.9517
AIF1	0	0	0	0	0	0	0.147466	0	0	0	0.078856	0	0	0.0274985	0
AIF1	0	0	0	0	0	0	0	0	0	0	0	0	0	0	0
AIF1	0	0	0	0	0	0	0	0	0	0	0	0	0	0	0
AIF1	0	0	0	0	0	0	0	0	0	0	0	0	0	0	0
AIF1	0	0	0	0	0	0	0	0	0	0	0	0	0	0	0
AIF1	0	0	0	0	0	0	0	0	0	0	0	0	0	0	0
AIF1L	3.67403	3.81726	3.70302	6.01682	5.82421	6.21068	4.25303	4.21197	4.60094	6.04206	5.48819	5.6053	3.51025	3.66248	3.38471
AIFM1	32.3738	34.3819	32.4745	30.4179	30.4484	31.3253	31.7612	32.0957	29.5433	32.2108	32.2563	33.4225	34.5903	31.9459	34.5706
AIFM2	14.4379	15.8045	14.8427	11.3495	11.0191	10.2971	9.3722	9.17971	9.2374	10.2721	10.7305	10.5475	9.85727	10.4288	10.3899
AIFM3	0.0181259	0.0610908	0.0357332	0.0528278	0.04303	0.0166814	0.0405486	0.0363464	0.0199038	0.0347639	0.0161324	0.110786	0	0.0336661	0.0705974
AIG1	7.62242	7.60913	7.41604	6.84999	7.60048	7.41024	5.2814	5.89697	6.21271	6.56327	5.74727	5.87009	6.07183	5.81673	6.03142
AIM1	1.17497	1.06925	1.16974	1.40119	1.54746	1.38052	0.750615	0.925279	0.905867	1.51431	1.53463	1.45989	1.60757	1.61493	1.55392
AIM1L	0	0.00647059	0	0	0.00594679	0	0.0168135	0.00753968	0.00825833	0	0.00670051	0	0	0.0139772	0
AIM2	1.67348	1.25482	0.851177	1.68009	1.46271	1.5365	1.73414	1.61322	1.37474	1.0849	0.954038	0.649662	1.79296	1.93549	2.24852
AIMP1	24.7564	23.4278	24.3503	25.1294	22.9312	23.0374	24.1466	23.813	23.7816	26.139	23.7442	26.0242	22.8341	22.1989	22.7618
AIMP2	24.5268	23.8745	24.8782	23.3677	24.6828	22.4791	26.9843	24.936	24.1189	26.5165	27.2446	25.4693	27.8161	27.7218	27.7816
AIP	33.8207	35.5863	34.0446	34.966	35.5656	31.9481	32.1224	30.9802	29.6218	35.8863	38.8214	33.3272	33.3525	35.9791	35.1241
AIPL1	0	0.0126528	0	0	0	0	0	0	0	0.01411	0.0130995	0	0	0	0
AIRE	0.0185383	0.0312123	0.017888	0.017629	0	0.0334097	0	0.0545844	0.0398638	0.0348053	0	0	0	0	0
AIRN	0	0	0	0	0	0	0	0	0	0	0	0	0	0	0
AJAP1	0	0	0	0	0.0110487	0	0	0	0	0	0	0	0	0	0
AJUBA	2.18412	2.23325	2.10797	2.68776	2.82241	2.89426	3.45151	3.12859	3.12294	2.42536	2.70641	2.56707	2.74632	3.18485	3.02204
AK1	12.771	13.5418	12.9682	11.2314	13.2919	11.644	11.3026	11.0185	11.5035	12.6929	12.1601	11.6415	11.8614	11.978	11.6358
AK2	39.9677	40.0413	40.3394	35.4112	34.7638	35.0959	34.807	35.7874	35.4073	36.9439	36.5092	36.5647	37.2527	37.0966	36.501
AK3	15.7809	15.2913	15.8041	13.7213	13.4829	13.5481	13.512	13.5882	13.4947	14.7454	14.4511	14.7134	13.3013	12.2117	12.7727
AK4	2.4529	2.40291	2.22619	2.41084	2.40106	2.51334	2.25655	2.35021	2.33251	1.50612	1.68246	1.47797	3.55897	3.76895	3.37678
AK5	0.310651	0.251087	0.41972	0.755825	0.709284	0.520567	0.630087	0.59748	0.847525	0.517796	0.487449	0.46809	0.462602	0.534806	0.519925
AK7	0.00313167	0.0131833	0	0.023811	0.00969786	0	0.0137093	0.00307307	0.0583473	0	0.0115622	0.0382604	0.0145734	0.0227804	0
AK8	0	0.103181	0.0394219	0.0582899	0.126608	0.0920511	0.0894866	0.0601536	0.0878644	0.0383514	0.0534039	0.0831439	0.063368	0.0185702	0.0794869
AKAP1	13.6511	14.1719	14.3757	14.4456	14.6928	14.5934	14.3995	13.3265	13.6879	13.6865	14.3207	13.4679	13.8203	14.8164	14.9123
AKAP10	12.5527	12.2968	12.7239	12.3008	11.6097	12.1833	12.2579	12.4731	12.9322	12.2047	12.8956	12.8384	11.8641	12.0262	11.9615
AKAP11	15.1615	14.6684	14.7334	13.2632	12.6016	12.4554	10.9763	10.997	10.5326	12.166	11.111	12.0288	11.013	11.0737	11.3138
AKAP12	2.14406	2.34302	2.20375	3.79232	3.73799	3.88872	3.71358	3.82217	3.47866	3.21404	3.03068	3.19314	3.81733	3.59285	4.04192
AKAP13	5.00118	4.83754	4.95076	5.66261	5.55147	5.74105	6.01646	5.93624	6.15059	5.7094	5.66426	6.11278	5.48899	5.77607	5.7251
AKAP14	0.0615884	0	0.0831704	0	0.0478819	0	0.333267	0	0.162811	0	0.0749985	0	0	0.0559086	0.145663
AKAP17A	23.6008	23.7788	24.502	23.6674	25.9483	24.6149	22.9344	23.2099	23.5553	23.1377	24.1198	23.144	22.2289	22.1009	22.4796
AKAP17A	0	0	0	0	0	0	0	0	0	0	0	0	0	0	0
AKAP2	15.7931	14.3815	16.6085	15.2087	14.6894	15.1625	22.8024	24.0701	23.4528	20.7436	19.92	20.3357	22.7344	21.8018	21.4797
AKAP3	0.234197	0.162379	0.0797679	0.144042	0.138664	0.173744	0.135706	0.216304	0.236941	0.116413	0.168119	0.154268	0.0854763	0.0751554	0.214471
AKAP4	0	0	0	0	0	0	0	0	0	0	0	0	0	0	0
AKAP5	0.0924504	0.0830367	0.0535411	0.140501	0.147836	0.149841	0.128091	0.0846552	0.105968	0.115772	0.0913655	0.0878909	0.0892409	0.0728699	0.095981
AKAP6	0.144427	0.134421	0.154088	0.158808	0.138191	0.130028	0.157948	0.116207	0.159266	0.117808	0.12264	0.147138	0.188688	0.221242	0.170182
AKAP7	1.13694	1.24436	1.45376	1.75619	1.58457	1.41259	1.32222	1.23774	1.45133	1.53894	1.63519	1.61128	1.27857	1.31801	1.23266
AKAP8	10.37	10.1194	11.0278	10.6054	10.7604	10.8258	11.0431	11.0189	11.0619	10.9286	10.3968	10.6254	10.9041	10.3376	10.671
AKAP8L	21.9191	22.4844	21.0511	19.0578	20.3189	18.5526	19.2142	20.2263	19.5841	20.3362	22.6278	19.6223	19.2599	20.2673	19.9069
AKAP9	7.59472	7.02356	7.07741	8.34192	8.13757	8.33961	6.70934	6.58773	6.56326	6.73198	6.23431	6.92758	6.47281	6.0687	6.45391
AKD1	0.971988	1.13447	1.22232	0.747546	0.747276	0.944269	0.560459	0.780629	0.811486	0.877851	0.754504	0.894687	0.969411	0.671787	1.00938
AKIP1	17.8975	17.4483	18.7115	16.6855	17.9355	16.3687	17.6496	15.9148	16.3146	17.6363	17.5449	18.3293	18.2133	17.6062	18.2688
AKIRIN1	29.1242	28.9753	30.3753	28.4446	27.9425	29.114	28.7799	27.6468	26.3855	26.7389	27.2748	26.4351	27.1623	26.045	27.9729
AKIRIN2	13.093	12.3266	12.7844	12.969	12.7015	13.7437	12.8377	14.0003	13.6322	13.7671	13.5845	12.936	14.1887	13.9713	12.8518
AKNA	1.0193	1.07199	1.08278	1.22934	1.00979	1.06254	1.05618	0.873018	0.94461	0.87124	0.912379	0.889979	0.970543	1.15789	1.08661
AKNAD1	0.189977	0.217049	0.152089	0.108953	0.152901	0.274664	0.193059	0.196844	0.18962	0.121067	0.153766	0.199614	0.192605	0.197453	0.22444
AKR1A1	31.376	30.1184	32.6326	25.8189	27.4132	25.8178	29.9541	29.5472	28.0635	28.7325	30.5088	29.5921	27.9207	29.2014	28.3652
AKR1B1	156.816	157.784	158.18	134.119	135.159	135.019	113.172	116.879	120.572	128.102	128.544	129.307	121.342	123.276	122.316
AKR1B10	2.23701	2.02406	1.4297	1.02467	1.37647	1.38663	0.674115	0.823581	0.992557	0.892164	1.07173	0.881513	1.09854	1.16897	1.25085
AKR1B15	0.136941	0.115262	0.079265	0.0651667	0.053076	0.0493855	0	0	0	0	0.0238579	0.0835591	0.0849466	0.024891	0
AKR1C1	39.6206	40.3184	40.533	26.8858	29.0876	28.1356	34.0888	33.0282	34.2509	35.0778	33.0416	33.5768	46.1256	43.8483	45.5213
AKR1C2	1.75651	1.78842	1.74359	1.46084	1.48147	1.73928	1.97881	1.78584	1.85111	1.41255	1.32055	1.6094	1.89339	2.07337	2.18264
AKR1C3	26.4351	27.5881	30.3413	24.1559	23.768	23.9497	28.1223	25.171	26.1204	26.8705	26.2744	27.054	33.9804	32.1655	32.0473
AKR1C4	0.10666	0.00554031	0.149217	0.0872008	0.0766344	0.0356418	0.00722163	0.145706	0.0212567	0.096957	0.123236	0.0802753	0.158227	0.0341782	0.16767
AKR1C6P	0	0	0	0	0	0	0	0	0	0	0	0	0	0	0
AKR1CL1	0.0404087	0	0.0389896	0.0192164	0.0208694	0	0.0442515	0.0396621	0.0217248	0	0.0176062	0	0.020891	0.0367331	0.0982693
AKR1D1	0	0	0	0	0.0126124	0	0	0	0	0	0	0	0	0	0
AKR1E2	0	0	0	0	0	0	0	0	0	0	0	0	0	0	0
AKR7A2	16.9565	18.1181	17.984	16.61	17.8237	17.3876	18.5275	17.6348	18.834	17.4714	19.1916	18.4024	19.0076	18.6749	19.3297
AKR7A2P1	0.069619	0.058589	0.083937	0.0331531	0.081001	0.125591	0	0.239275	0.112361	0.117926	0.0404156	0	0.143934	0.134418	0.101524
AKR7A3	0.0752409	0.126633	0.123105	0.250879	0.233502	0.187795	0.206289	0.147783	0.2429	0.0833231	0.0655099	0.152918	0.0388873	0.102535	0.14628
AKR7L	0.162482	0.239363	0.190516	0.227541	0.141608	0.192798	0.245121	0.199351	0.11874	0.105593	0.123888	0.227325	0.0840006	0.121312	0.0805765
AKT1	77.6039	77.3759	77.8538	82.0507	83.3385	83.2549	82.0897	82.1053	82.1284	84.2625	85.9114	83.3141	90.4881	90.9549	93.415
AKT1S1	36.3229	39.9966	38.8352	36.234	40.7948	37.6024	36.7709	36.1874	33.4052	39.2401	38.5251	39.5599	42.8978	44.8156	44.5585
AKT2	25.7635	26.8741	26.0799	29.9	30.9841	31.7774	30.626	29.5418	29.7417	30.7975	32.4226	31.2548	30.7422	31.8761	31.8932
AKT3	10.7259	10.4098	11.0349	10.679	10.6387	11.4378	10.5532	11.4314	11.0836	12.0999	10.6478	11.5917	10.4835	10.6872	10.2962
AKTIP	7.61323	7.32291	7.18925	6.0367	7.14106	6.70571	6.54442	6.38985	6.27499	6.21223	6.40511	6.07889	5.63434	6.43311	6.1009
ALAD	8.90147	9.04369	9.28569	9.9032	9.8485	9.88722	7.69496	8.13878	8.87317	9.51123	9.50547	9.55714	8.42867	8.26343	7.32274
ALAS1	31.8533	33.8635	32.9766	29.9364	27.9623	28.1624	30.1223	30.8787	30.9248	28.9762	28.8826	30.2402	32.137	32.625	33.1722
ALAS2	0	0	0.0219058	0	0	0	0	0	0	0	0.0197823	0	0	0.0206374	0
ALB	0	0	0	0	0	0	0	0	0	0	0	0	0	0	0.0184951
ALCAM	6.20832	6.171	6.45186	7.76554	7.21333	8.2108	5.18482	5.28978	4.86323	5.02853	4.69296	5.18335	4.19889	3.84848	3.79783
ALDH16A1	12.9319	13.2934	12.3937	9.27635	10.9081	10.2469	9.23184	8.9148	8.93708	9.60111	10.0321	8.93912	10.0759	9.88753	9.32541
ALDH18A1	25.5519	25.4561	25.2498	33.5747	34.8601	35.3939	27.1131	27.21	26.3751	33.081	32.9473	33.9237	26.7081	27.5246	28.0171
ALDH1A1	1.54252	1.47976	1.19421	0.716336	0.819647	0.77577	0.451683	0.369677	0.424253	0.67352	0.640893	0.711891	0.537852	0.521794	0.558376
ALDH1A2	0.0258303	0.0108735	0.0249278	0.049102	0.0124983	0	0.0282698	0.0253473	0.0138819	0.0332483	0.022517	0	0.0267115	0	0.0125665
ALDH1A3	134.82	135.469	136.18	177.202	174.219	175.108	166.17	165.123	164.063	167.17	165.786	166.977	228.587	229.546	226.697
ALDH1B1	15.1594	15.0307	15.7136	17.2909	17.1419	16.9371	17.3474	17.1342	17.1538	16.6561	18.2758	17.7407	18.5037	18.5955	18.6091
ALDH1L1	0	0	0	0.0132482	0.0215934	0.0125554	0	0	0	0.0261795	0	0.0141883	0.0141528	0	0.0135611
ALDH1L1-AS1	0	0	0	0	0	0	0	0	0	0	0	0	0	0	0
ALDH1L1-AS2	0	0	0	0	0.0141957	0	0	0	0	0	0	0	0	0	0
ALDH1L2	1.00815	1.09381	1.10558	1.35246	1.50692	1.18337	1.02184	1.22273	1.32151	1.60623	1.6064	1.60765	1.0809	1.04719	1.02751
ALDH2	14.0968	14.026	14.2227	28.4603	27.2203	28.562	28.1596	27.9205	28.0943	23.4669	23.4653	23.0735	23.3632	22.7161	22.3615
ALDH3A1	6.47413	6.70643	6.33253	5.50184	5.29249	5.43639	3.92522	4.32572	3.82875	4.31356	4.02221	4.28427	4.11326	4.68202	4.67364
ALDH3A2	66.7762	66.4617	67.7114	62.2554	60.1397	61.1779	51.4927	52.924	52.1213	50.1657	49.4649	51.128	53.6206	53.5425	54.4299
ALDH3B1	4.31267	4.48387	4.89835	4.72903	5.01766	4.76058	2.73129	2.84402	2.81178	3.22881	4.16516	3.70562	3.5762	3.06391	3.59242
ALDH3B2	0.0339042	0.0142704	0.0490755	0.0161172	0.0689299	0.0305482	0.0742398	0.0499128	0.0364505	0.0159136	0.0591002	0	0.017528	0.0359613	0.0659721
ALDH4A1	3.63518	3.98709	3.81435	4.92181	4.40506	4.74684	4.36543	4.18239	4.40566	4.92363	4.8124	4.69754	4.60304	4.98034	4.64009
ALDH5A1	2.73625	2.84022	2.76204	3.61591	3.80296	4.08573	3.04501	2.96494	3.24265	3.86074	3.44258	3.32105	2.92742	3.05767	2.9362
ALDH6A1	4.95429	4.33611	4.47686	5.4597	5.89383	5.33274	4.80087	4.99775	4.31234	5.13043	4.98546	5.22133	4.87877	4.28331	4.16918
ALDH7A1	4.66319	4.73093	4.88756	6.88569	6.25272	6.93402	6.36852	6.88608	6.49428	7.35322	7.41696	7.25158	6.01511	5.81261	6.03679
ALDH8A1	0.0659627	0.0447368	0	0.0167499	0.0818686	0.0159286	0.0387483	0.0347296	0.0761438	0.0831472	0.0462833	0.0360139	0.0182796	0.0640638	0.0344263
ALDH9A1	31.4505	32.5011	33.7236	29.5846	28.5376	28.7766	30.2977	29.9695	28.2612	31.8751	30.5354	32.1212	28.321	27.44	27.9656
ALDOA	552.683	575.239	564.019	465.333	485	471.564	475.462	467.292	470.287	473.008	490.129	477.125	559.541	575.841	568.101
ALDOB	0.0174743	0.102976	0.151756	0.0996934	0.121805	0.0787256	0.0573954	0.1029	0.0563612	0.0492137	0.0913753	0.0533521	0.018069	0.0476589	0.102001
ALDOC	22.5901	22.8168	23.1163	19.0932	19.1154	19.6874	14.3504	14.3625	14.5496	16.7576	16.7269	16.6837	19.3792	18.9909	18.5688
ALG1	6.56704	6.64334	6.61546	6.71839	6.50794	6.1396	6.03816	5.7934	5.87613	6.60373	6.05619	6.51928	6.24852	6.52424	6.71501
ALG10	1.37128	1.57721	1.60189	1.89409	1.70725	1.96647	1.75741	1.99677	1.84965	1.58035	1.75445	1.68423	1.45464	1.80188	1.76255
ALG10B	1.42934	1.47658	1.36046	1.47156	1.36916	1.49338	1.2987	1.30347	1.2907	1.33026	1.37419	1.39556	1.29784	1.29706	1.20236
ALG11	8.74828	8.81281	9.1623	8.89703	8.93661	9.46608	9.02259	8.60635	9.35535	9.09601	8.87728	9.11048	8.30835	7.71568	8.5011
ALG12	10.3838	10.5049	11.1945	11.1848	11.329	11.6311	9.0169	8.73282	9.18152	10.1513	10.758	11.0595	10.6446	10.026	9.64899
ALG13	12.3818	12.34	11.707	12.4358	11.3406	12.5544	11.6748	11.8255	11.5514	11.7663	11.9662	12.0165	10.6017	10.2611	10.4059
ALG14	11.7767	11.7593	11.8418	10.3979	8.92987	10.7121	9.60505	9.1377	10.951	12.8483	11.1668	12.3323	9.61409	10.6546	9.52927
ALG1L	0.0647873	0.272453	0.249767	0.386395	0.503826	0.248804	0.498479	0.191036	0.279207	0.607094	0.338005	0.28471	0.485514	0.499849	0.377454
ALG1L2	0.00852644	0.0918176	0	0.0640496	0.0123628	0.0230949	0	0.0658199	0.0629545	0	0.0278929	0.0692458	0.0125879	0.0567807	0.00710044
ALG1L9P	0.15381	0.204184	0.305327	0.241045	0.184485	0.229931	0.151524	0.219383	0.0873023	0.246151	0.181635	0.197508	0.177041	0.26519	0.234327
ALG2	20.9492	19.6174	20.8504	19.9156	20.1995	20.5099	18.9778	18.8912	18.1133	19.0643	18.7259	19.7242	19.359	19.5655	19.1013
ALG3	36.9217	37.2334	36.905	38.11	36.548	36.3621	34.6447	34.7429	34.0402	37.8356	38.8545	38.0073	36.4837	38.7485	37.806
ALG5	17.8237	19.6419	17.8202	20.8116	20.2525	21.0056	20.4807	20.0553	20.5829	24.3678	22.6293	22.5786	19.2911	19.3861	18.9616
ALG6	23.9472	21.114	21.4485	27.5909	27.1969	28.2805	20.7711	21.4061	20.3219	25.6515	24.893	25.844	20.1087	19.5294	20.0295
ALG8	34.7715	35.3113	36.1491	35.2619	31.9817	33.903	33.5202	36.6316	35.113	35.232	34.3052	35.5405	33.6596	32.8809	32.9361
ALG9	5.42275	5.55017	5.64314	5.89539	5.57337	5.94597	5.72199	5.68848	5.81709	5.87807	5.66687	5.889	5.77564	5.63657	5.39777
ALK	0.332251	0.516494	0.499543	0.734361	0.726349	0.65588	1.02739	1.12836	0.947513	0.810118	0.830622	0.904626	1.35687	1.37139	1.18572
ALKBH1	2.98071	3.32487	3.09919	2.325	2.32307	2.87896	2.64144	3.05595	2.8218	2.89275	2.65711	3.10295	2.59614	3.17189	2.85502
ALKBH2	21.6401	21.3958	22.4537	19.2906	20.8697	20.0689	21.715	23.3327	21.4755	25.5822	25.8998	24.8187	22.8778	23.8786	24.1611
ALKBH3	14.4308	12.9381	14.1963	12.0801	11.3864	11.9829	13.1889	14.4759	12.7617	13.597	15.2281	13.8045	14.5948	12.9072	14.2826
ALKBH4	7.23563	8.10427	7.64643	6.5156	7.1441	6.61204	7.19133	7.02736	7.69301	7.03926	8.56581	7.42421	7.85874	8.69625	7.98483
ALKBH5	52.8808	54.472	52.8345	49.6987	53.5546	50.5096	48.6072	47.6726	49.6367	49.0831	51.234	51.3234	53.7565	54.9944	54.7383
ALKBH6	14.9424	15.1159	15.3805	13.4975	15.3259	14.0473	14.2804	11.3253	11.4043	12.183	12.8748	11.9318	15.0461	13.0771	14.4999
ALKBH7	18.4719	20.5816	19.4461	17.329	18.701	16.8483	14.6017	12.3643	14.4409	18.6276	19.2481	16.7008	17.9507	17.4122	16.5794
ALKBH8	3.38132	3.36233	3.54908	3.78493	3.74326	3.91288	3.99619	4.50904	4.0547	4.03265	4.20762	4.11751	3.73896	3.99938	3.79828
ALLC	0	0	0	0	0	0	0	0	0	0	0	0	0	0	0
ALMS1	2.61055	2.54069	2.35255	2.7389	2.45762	2.56657	2.62755	2.56392	2.41257	2.47569	2.39881	2.41481	2.45854	2.69549	2.46121
ALMS1P	0.140219	0.0619599	0.0541072	0.0533844	0.108699	0.151708	0.153653	0.0825972	0.0301648	0.0328952	0.0977126	0.0855547	0	0.0254861	0.0545422
ALOX12	0.054085	0.0455311	0.0173962	0.0514297	0.0418911	0.0324897	0.0592178	0.070776	0.0581496	0.0507729	0.0707023	0.0550413	0.0745668	0.0327793	0.0350773
ALOX12B	0	0.0142225	0	0	0	0	0	0	0.0181628	0.0158602	0.014724	0	0	0.0307182	0.016436
ALOX12P2	0	0	0.0146055	0	0	0	0.0165675	0.0148531	0	0	0.0131921	0	0	0.0275216	0.0441773
ALOX15	0	0	0	0	0.0121189	0.028199	0	0.0153583	0.016824	0	0	0.0159293	0	0	0
ALOX15B	0	0	0	0	0	0	0	0	0	0	0	0	0	0	0
ALOX15P1	0.0842725	0	0	0	0	0	0	0	0.090876	0	0	0	0	0	0
ALOX5	0	0	0	0	0	0	0	0	0	0	0	0	0	0	0
ALOX5AP	0.0558094	0	0	0	0.0433675	0	0.0612977	0	0	0	0	0	0	0	0
ALOXE3	0.0128024	0	0	0	0.029738	0	0.0140111	0	0	0	0	0	0.0264805	0.0116406	0.0124573
ALPI	0	0	0	0	0	0	0	0	0	0	0	0	0	0	0
ALPK1	3.90793	3.67764	3.74584	3.20869	3.12375	3.16973	3.19767	3.00956	3.14511	3.28779	3.02759	3.20623	3.37399	3.05338	3.28078
ALPK2	0.0163689	0.0413504	0.0526663	0.0362759	0.0422157	0.0343897	0.0119358	0.005353	0.0234522	0.0102493	0.0142742	0	0.0282158	0.0198498	0
ALPK3	0.0216752	0.0152102	0.00348711	0.0308746	0.0195622	0.0357757	0.0316052	0.0318953	0.0465781	0.0305388	0.0283546	0.0441646	0.0373636	0.0328576	0.0281316
ALPL	0.335373	0.273233	0.252673	0.0699752	0.128246	0.109965	0.0604277	0.12741	0.0697838	0.167585	0.0961937	0.14195	0.133157	0.0737678	0.125277
ALPP	0	0	0.00703042	0	0	0	0	0	0	0	0	0	0	0	0
ALPPL2	0	0	0	0	0	0	0	0	0	0	0	0	0	0	0
ALS2	10.7594	9.81042	10.0041	9.26985	8.8001	9.63514	9.37007	9.71821	9.45851	8.87131	9.6818	8.96038	9.31449	9.59988	9.47423
ALS2CL	0.0409241	0.0654295	0.0394934	0.0635455	0.0769359	0.0952668	0.0179026	0.0244736	0.0267214	0.0307395	0.0649273	0.0379653	0.0257082	0.0113022	0.0241901
ALS2CR11	0.00703969	0	0.0239459	0.0267486	0.00544739	0.0218366	0.00770076	0	0	0.00661141	0.0122767	0	0.0145612	0.022526	0
ALS2CR12	0.156384	0.188056	0.0862191	0.212518	0.10386	0.322171	0.220224	0.197363	0.0720664	0.18872	0.210362	0.159097	0.254088	0.0812226	0.10865
ALS2CR8	1.27247	1.20443	1.04312	1.38545	1.37334	1.46455	1.55182	1.47046	1.44129	1.39988	1.30952	1.34238	0.920793	1.04028	1.17382
ALX1	0	0.0301349	0	0	0	0	0	0.105494	0	0.0335927	0	0.0363935	0.0740317	0.0976037	0.0348114
ALX3	0.366856	0.411679	0.471841	0.436574	0.33186	0.606492	0.368582	0.690374	0.328873	0.65976	0.426025	0.590571	0.632093	0.166685	0.356712
ALX4	0.00736133	0.00619839	0	0	0.00569644	0	0	0.0072224	0.00791076	0	0.0064187	0.00749749	0.00761318	0.0133893	0
ALYREF	146.153	146.195	149.108	156.249	160.31	159.761	175.327	170.883	166.982	173.894	174.169	180.139	178.875	178.07	183.089
AMACR	5.09889	5.0774	5.58504	6.74513	6.6364	7.12454	5.96808	5.2272	5.42168	6.82487	6.53943	6.31207	5.39639	5.79656	5.37512
AMBN	0	0	0	0	0	0	0	0	0	0	0	0	0	0	0
AMBP	0.0633982	0.0266785	0	0	0	0	0	0.0311247	0.0341023	0	0	0	0	0	0
AMBRA1	7.77779	8.0214	7.46857	7.69479	8.00045	8.06585	6.97262	7.80077	7.14845	7.91958	8.02141	8.12924	7.72972	7.59859	7.29905
AMD1	61.8257	62.4558	61.8466	57.9207	57.7067	57.7335	60.2687	60.1905	60.0551	58.3794	57.5009	57.9672	55.6726	54.9641	55.1905
AMDHD1	0.643512	0.575572	0.504494	0.745924	0.68546	0.761151	0.748749	0.572406	0.800054	0.8117	0.665905	0.613865	0.665383	0.493577	0.430363
AMDHD2	8.38952	8.55482	7.51846	5.40978	5.6403	6.11205	5.87856	5.70064	5.34615	5.85212	6.10277	5.64026	6.76065	7.97344	7.71991
AMELX	0	0	0	0	0	0	0.0733112	0	0	0	0	0	0	0	0.0705671
AMELY	0	0	0	0	0	0	0	0	0	0	0	0	0	0	0
AMER1	1.69616	1.49554	1.62362	2.10617	2.12407	1.86979	1.9662	1.96362	2.01943	1.86231	1.84792	1.93848	1.85146	1.97429	2.02141
AMER2	0	0	0	0	0	0	0	0	0	0	0	0	0	0	0
AMER3	0	0	0	0	0	0	0	0	0	0	0	0	0	0	0
AMFR	29.9052	31.0319	29.2819	30.526	29.5421	29.7548	27.6737	26.7716	28.5079	28.5003	30.5589	30.1798	30.4539	30.7218	30.6089
AMH	12.1477	12.0473	10.9197	12.9408	13.0468	13.3039	12.3657	11.6609	13.0242	11.4827	12.7878	11.1605	10.1678	10.6625	10.0656
AMHR2	0.0234373	0	0	0	0	0	0	0	0	0	0	0	0	0	0
AMICA1	0	0	0	0.0019162	0	0	0.0546434	0	0	0	0	0	0	0	0
AMIGO1	3.47169	3.6621	3.47044	2.99623	3.20321	3.57999	2.79374	2.7397	3.01963	2.94224	3.43297	3.45115	3.29387	3.31638	2.86578
AMIGO2	0.844278	0.665093	0.793819	0.762484	1.01788	1.27709	0.70869	0.748637	0.659545	0.603081	0.739426	0.57144	0.568566	0.38482	0.423053
AMIGO3	3.504	3.85867	4.26065	4.71629	4.67731	4.33085	4.46424	4.56644	4.85145	3.97424	4.06835	4.40885	3.95682	4.2819	4.09125
AMMECR1	19.7858	18.7968	18.9297	14.2176	13.9321	14.6467	18.1079	18.047	18.2653	19.2248	18.2754	18.1227	16.4055	16.2802	17.7134
AMMECR1L	9.09509	9.20232	8.80333	10.0056	9.20023	9.44891	9.57109	9.80002	9.71859	8.94019	9.74423	9.9423	9.12807	9.93656	9.84144
AMN	0.0575483	0.0242182	0	0.0547786	0.0223073	0.0259444	0	0.0282501	0.0928545	0.0540015	0	0.0877781	0	0.0261493	0.0839416
AMN1	2.00011	1.78659	2.18717	2.18228	2.10041	1.73531	1.99063	1.95047	1.81934	2.28392	2.24094	1.91267	1.86542	1.62011	1.73511
AMOT	2.48236	2.40634	2.37393	4.20654	4.04	3.91401	4.61202	4.64098	4.30004	3.95599	4.1654	4.15271	3.37299	2.7763	3.13817
AMOTL1	26.3014	26.1131	25.9934	29.7946	30.1763	30.3671	36.7881	36.5476	36.3	34.1428	32.7662	33.624	36.1582	35.0372	35.6912
AMOTL2	9.02498	10.0662	9.78436	16.8436	16.9474	17.004	10.7936	10.7276	10.4219	11.623	12.0138	11.6958	11.4022	11.1388	10.8461
AMPD1	0	0	0	0	0	0.015933	0	0	0	0.0166	0	0	0	0	0
AMPD2	23.626	24.8417	24.2691	24.5515	26.5589	25.8336	22.0023	21.6685	22.3407	23.7803	24.7758	24.8738	23.6204	24.2127	23.4793
AMPD3	0.253357	0.241159	0.246766	0.123707	0.10291	0.0681931	0.0783336	0.0712521	0.0605086	0.078601	0.103387	0.113648	0.0846125	0.146331	0.0597149
AMPH	0.764128	0.864825	0.941192	2.32158	2.46568	2.61783	1.7822	2.04052	2.15654	1.63493	1.56154	1.6707	1.20503	1.37821	1.15797
AMT	2.41735	2.69809	2.80599	3.52355	3.52782	2.95715	2.91097	3.15439	3.4482	2.58634	2.67609	3.01713	2.51524	2.20512	2.14869
AMTN	0	0	0	0	0	0	0	0	0	0	0	0	0	0	0
AMY1A	0.0449769	0.000104427	0.00430217	0.00881655	0.00497564	2.76708e-05	0.0344102	0.0438306	0.000433097	0.0520639	0.0111286	0.0357585	0.0168216	0.0189849	0.0246317
AMY1A	0.0218832	0.000224494	0.0815091	0.0303681	2.17866e-06	0.0133411	0.0135556	0.000529712	0.00143292	0.0907961	0.0199021	0.0554205	0.0295397	7.25942e-06	0.000487573
AMY1A	0.0233902	0.0308262	0.00568265	0.044284	0.00777245	6.90244e-05	0.0344102	0.0619876	0.000523643	0.029781	0.0314675	0.0888488	0.0295397	1.31075e-05	0.0295041
AMY1B	0.000323881	0.00380443	0.0229046	0.0679154	0.00483199	4.95199e-08	3.22118e-06	0.00231599	5.97028e-10	1.47148e-08	0.0571129	9.57029e-07	0.037269	0.000117815	1.1564e-06
AMY1B	0.00794958	0.00635381	0.000786312	0.0110037	0.0786023	1.72082e-09	0.0131217	0.0779788	1.45328e-07	7.1734e-07	4.54375e-06	3.53408e-06	0.00148295	0.0245842	0.0512346
AMY1B	0.00856975	0.00376195	0.036974	0.0170619	0.00801658	4.45779e-07	3.22118e-06	0.00377703	0.0951485	0.000446957	1.60395e-05	2.19917e-06	0.00148295	0.033072	1.95511e-06
AMY1C	8.37779e-10	0.0394914	0.0162837	4.04491e-06	0.0364548	0.056886	0.0217516	0.00127179	0.0437046	0.00367636	7.01494e-06	0.0183085	0.000363035	0.028247	0.0190527
AMY1C	0.000136104	0.0599143	2.44165e-08	0.000344334	6.53703e-05	0.0972964	0.0137623	0.00270596	0.0843672	0.00737001	0.0421095	0.028477	0.00445107	0.0221902	0.000716772
AMY1C	0.000149914	0.0270057	0.0246176	0.000601346	0.0578048	0.0894723	0.0217516	0.00196351	0.000805496	0.0637376	0.0671715	0.000248022	0.00445107	0.0289269	0.0227949
AMY2A	0.00247756	0.0114694	0.0306733	0.00576395	0.0105627	0	0	0.0267555	0.0117254	0.0127875	0.0166183	0.0138579	0.0140879	0.00412805	0
AMY2B	0.510076	0.553222	0.500581	0.717366	0.584327	0.60447	0.34194	0.528582	0.395147	0.487322	0.484801	0.21016	0.296604	0.416976	0.300003
AMZ1	0.147242	0.108479	0.079937	0.0961789	0.0997137	0.0580148	0.0201372	0.0541767	0.0494514	0.0604941	0.0641879	0.0468577	0.0571029	0.066949	0.053735
AMZ2	53.405	53.0915	55.2012	55.2462	56.6224	57.9247	58.936	59.6756	60.1014	60.8891	58.76	61.4547	56.8828	58.4673	60.4593
AMZ2P1	2.25544	2.23146	2.15549	2.5646	2.04486	2.15024	2.33501	2.48054	2.10569	2.60885	2.22283	2.67638	2.01868	1.84576	1.91406
ANAPC1	12.5639	12.2084	12.375	12.7697	12.8663	12.8132	14.4058	14.0012	14.0072	13.1877	12.5528	12.9356	13.3109	13.3831	13.7676
ANAPC10	7.31843	6.05054	6.97202	6.401	6.85879	7.66946	6.28677	6.04924	6.99159	8.07272	6.36002	7.33769	6.43955	6.63876	5.81848
ANAPC11	92.3971	95.5447	92.2655	76.7067	81.7443	82.522	78.4245	78.3188	77.6573	89.0561	86.1458	86.3876	78.4713	80.3509	76.6113
ANAPC13	46.0962	47.8462	45.9146	51.3006	50.8615	51.7046	45.4393	43.7897	44.1634	49.4627	47.031	50.7444	43.0954	42.2117	43.1855
ANAPC15	27.3167	27.6956	27.6422	24.6388	24.1286	26.9972	24.4193	24.06	26.2153	26.6881	26.5766	28.2744	25.3593	25.4042	27.7116
ANAPC16	18.5774	17.9414	18.5121	15.8634	15.3645	15.7487	14.9294	14.7184	15.0392	16.0498	15.3894	16.3279	14.8875	13.7438	14.0403
ANAPC1P1	2.35001	1.79642	1.94935	2.54385	2.34316	1.80997	2.66881	2.39309	2.29428	2.11964	1.85981	2.04221	2.28085	2.33222	2.14335
ANAPC2	11.9572	12.809	11.7468	11.196	11.8602	12.1362	10.8595	10.1628	10.7315	9.70781	11.9533	11.0155	10.9657	11.6205	10.5141
ANAPC4	10.8824	10.1017	10.9415	11.4822	10.6436	11.2497	11.2415	10.5101	11.3102	10.837	10.1156	11.1888	10.2937	9.22206	9.92993
ANAPC5	68.0434	68.5766	69.4022	61.5939	60.8157	61.76	61.7784	62.6432	61.4117	63.8527	67.0786	66.5401	58.7924	60.7615	59.4333
ANAPC7	33.7949	31.5813	33.1592	30.5424	30.0888	30.5233	33.3716	34.7496	33.5808	30.9681	31.347	31.7914	30.5228	31.2835	31.735
ANG	0.810882	1.24742	1.2707	0.973119	1.29864	0.637452	1.38053	1.10775	1.51271	1.49859	1.27124	0.968801	1.13373	1.41271	1.48295
ANGEL1	4.85105	5.20374	5.21806	5.5991	5.6436	5.66677	5.11247	5.03567	4.7126	4.51814	5.24991	4.82871	4.98858	4.86463	4.60498
ANGEL2	5.73589	5.07182	5.63701	5.48263	5.63999	5.33042	5.6841	5.36273	5.4936	5.05094	5.09987	4.77609	5.38206	4.75638	5.61612
ANGPT1	9.12338	8.60546	9.22151	8.24992	8.2664	8.97681	9.73523	10.0679	9.80845	12.4683	11.8373	12.0736	9.26523	9.58437	9.38364
ANGPT2	0.0236823	0.041766	0.0533377	0	0.0244365	0.0355456	0.0518186	0.023236	0.0509037	0	0.0206491	0.0241193	0.0244924	0.0574356	0.0153647
ANGPT4	0	0	0	0	0	0	0	0	0	0	0	0	0	0	0
ANGPTL1	0.185633	0.185599	0.268729	0.507187	0.449067	0.491164	0.241231	0.204923	0.274349	0.337723	0.505717	0.507956	0.107983	0.126598	0.090319
ANGPTL2	15.6153	15.4018	15.8796	17.2055	16.6593	16.0206	15.8693	15.4084	15.6158	19.6742	19.9317	19.3406	11.8001	11.2533	12.4236
ANGPTL3	0.0202149	0	0	0	0	0	0	0.0198414	0	0	0	0	0	0	0
ANGPTL4	5.01128	5.73367	6.02534	8.65792	8.76256	8.40072	13.983	15.2025	14.1521	7.12551	7.80475	5.888	11.5697	12.4001	13.2722
ANGPTL5	0.0897233	0.0151066	0	0.0341271	0.0138988	0.0323388	0	0	0	0	0.0156388	0.0182621	0.0185552	0	0.0174573
ANGPTL6	4.06946	4.3759	3.63119	4.27451	4.32005	4.32538	3.50431	3.50978	3.66805	3.22334	3.69928	3.97221	3.71299	3.84855	3.45472
ANGPTL7	0.0381935	0.0321523	0.0368532	0.0363221	0.0147926	0.0344174	0.0418219	0	0	0.0179265	0.0332838	0.0388658	0	0.0347207	0.0185773
ANHX	0	0	0	0	0	0	0	0	0	0	0	0	0	0	0
ANK1	0.0421146	0.0475472	0.0316125	0.0577639	0.0927669	0.0657356	0.0638802	0.0805194	0.0817984	0.0771401	0.0985776	0.0682455	0.110977	0.118483	0.09505
ANK2	1.61862	1.54959	1.71915	2.1579	2.30321	2.31891	2.52153	2.31242	2.42719	2.45297	2.28264	2.44406	2.44538	2.51284	2.52648
ANK3	0.394983	0.309775	0.343861	0.754397	0.64506	0.711215	0.859971	0.863601	0.961726	0.800548	0.672964	0.672893	0.671943	0.707186	0.763815
ANKAR	0.276013	0.132101	0.195355	0.166088	0.0925692	0.157431	0.252429	0.153464	0.227422	0.146879	0.15241	0.149909	0.161753	0.184066	0.161167
ANKDD1A	1.50998	1.44499	1.64773	1.47859	1.74535	1.82645	1.45117	1.38752	1.23311	1.2441	1.32555	1.32176	1.28284	1.1886	0.986422
ANKDD1B	0.0328853	0.0830285	0.0317203	0.156574	0	0.0296586	0	0.0645812	0.141521	0.0617072	0.0859163	0.0668591	0	0.0597625	0
ANKEF1	1.82767	2.01018	1.66289	2.60614	2.46505	2.30804	2.05163	1.99697	2.0129	1.87948	1.95319	2.09503	2.64467	2.43042	2.38256
ANKFN1	0.104846	0.102976	0.134894	0.138463	0.0947376	0.110216	0.0765272	0.191508	0.0939354	0.131237	0.106605	0.17784	0.0722761	0.0476589	0.187001
ANKFY1	19.0328	18.9656	18.9409	19.885	18.9221	19.2912	19.4205	19.5414	18.7972	17.3099	17.3154	18.1149	18.2785	18.1409	17.8182
ANKH	4.82996	4.75958	4.71116	4.00598	3.95196	3.92261	3.83913	3.93405	4.13734	5.6269	5.63005	5.54357	4.99792	4.70525	5.2592
ANKHD1	7.70484	7.46118	7.79529	8.48826	7.69713	7.97675	7.16588	7.65522	7.42666	7.18326	8.34176	7.70755	7.93498	8.21676	8.02848
ANKHD1-EIF4EBP3	2.78363	2.92238	2.67448	2.49333	3.14335	2.82483	3.42492	2.81208	3.37411	2.12457	1.59675	2.06604	2.34382	2.47334	2.31112
ANKIB1	19.8683	19.0609	19.9276	23.8624	23.5585	23.9014	24.6129	25.4349	24.0551	24.7498	23.7677	24.9186	24.4057	23.3373	24.2475
ANKK1	0.0165968	0.0838338	0.0480462	0.0473396	0.0137102	0.0149536	0	0.0325766	0	0	0.0289301	0.0337842	0.0686475	0.0301779	0.0807347
ANKLE1	0.154474	0.249274	0.310576	0.207993	0.229221	0.405852	0.197238	0.265273	0.207556	0.181304	0.336643	0.26211	0.13312	0.163867	0.225464
ANKLE2	36.741	37.44	36.3722	37.0754	37.0805	37.9919	34.6486	35.1421	36.5202	35.7065	35.2748	35.9582	34.3128	35.0694	34.3111
ANKMY1	1.95497	2.05829	1.76269	2.41782	2.36207	2.21701	2.25873	2.39365	2.19666	2.24468	1.68503	1.89498	1.77565	2.13849	2.33902
ANKMY2	10.2373	10.926	10.1336	8.94051	8.86165	9.3576	9.79745	9.496	9.92305	10.2775	8.72094	10.201	8.67358	8.30146	8.86747
ANKRA2	2.63002	2.9848	2.97005	3.96493	3.69734	3.54629	3.09329	3.155	3.07922	4.07812	3.51423	3.09253	3.36403	2.62108	2.7669
ANKRD1	0	0	0	0	0	0	0	0	0	0	0	0	0	0	0.0427202
ANKRD10	20.0131	19.6016	20.9144	23.3307	23.8596	23.2234	23.1349	22.2222	23.1193	22.4315	20.5586	21.4035	20.839	20.1051	21.4364
ANKRD11	14.6129	14.2791	14.1904	15.0434	15.0846	15.0699	14.9738	15.0431	15.1716	14.0119	15.1715	14.9236	15.6004	15.7112	15.8404
ANKRD12	12.8282	12.2404	12.4141	14.2231	13.3026	13.8361	12.0577	12.6099	12.5033	12.9947	11.9369	12.1958	12.7037	12.4401	12.5106
ANKRD13A	14.0442	13.6314	14.2505	12.2218	11.0695	12.3729	12.3904	12.2689	11.3276	12.8346	12.4632	12.9156	12.1432	10.9164	11.6864
ANKRD13B	12.2411	13.2209	11.681	10.8028	11.1967	11.2505	11.6244	11.4097	11.9224	11.3465	12.117	12.0233	10.7133	11.2373	10.9322
ANKRD13C	7.13966	7.22965	7.63712	7.54994	7.43403	7.49533	7.26724	6.86573	6.83232	7.24464	7.01064	7.59322	7.14932	7.46029	7.41458
ANKRD13D	15.3647	16.5391	15.7417	15.4593	17.1493	14.9577	13.5873	14.8734	14.0672	14.8209	14.6014	14.5166	14.2628	15.6325	14.5233
ANKRD16	4.04499	3.2084	3.64027	3.3963	3.30637	2.98126	3.86636	3.98998	4.02683	4.34954	3.96718	3.21591	4.33294	3.59073	3.41233
ANKRD17	14.2091	13.9287	13.8614	14.333	14.1586	13.9313	14.3938	14.7951	14.211	13.9136	13.8038	14.1199	14.575	13.7607	14.2673
ANKRD18A	0	0.023091	0	0.0616789	0.0382125	0.0197614	0.0240084	0	0.029477	0.0154517	0	0	0	0.0299261	0.0231296
ANKRD18B	0.0764654	0.188544	0.110696	0.151381	0.114151	0.147582	0.107579	0.0857493	0.117408	0.220536	0.176179	0.100104	0.225933	0.15893	0.15945
ANKRD18DP	0	0	0	0	0	0	0.00263034	0	0	0	0	0	0	0	0
ANKRD19P	0.173902	0.147692	0.157407	0.144883	0.303627	0.0748843	0.284776	0.242173	0.178701	0.22017	0.296934	0.157238	0.100252	0.227646	0.167179
ANKRD2	0	0	0	0.0297416	0	0.0281703	0.0372215	0	0.0365282	0	0.029564	0	0	0.0283862	0
ANKRD20A1	0.970661	0.928979	1.00801	1.72193	1.54326	1.72722	1.80793	1.88792	1.48558	1.75172	1.4379	1.44879	1.29852	1.50053	1.42468
ANKRD20A11P	0.132448	0.137447	0.234153	0.140286	0.182786	0.585492	0.242221	0.137327	0.262961	0.621056	0.204946	0.0896846	0.23576	0.200506	0.228828
ANKRD20A12P	0.618851	0.627208	0.80418	0.745103	0.675389	1.07021	0.470441	0.644709	0.230914	1.2327	0.880225	0.462455	0.652884	0.50507	0.814189
ANKRD20A19P	0.00791914	0	0.00764339	0	0.00612838	0.0142628	0	0	0	0	0	0.00268843	0.00818999	0	0.00770718
ANKRD20A2	0.914815	0.860846	0.836657	1.54539	1.48709	1.48159	1.63672	1.65614	1.43263	1.44694	1.18292	1.22014	1.26743	1.43118	1.25425
ANKRD20A2	0.776894	0.757153	0.739319	1.41552	1.30453	1.34998	1.44095	1.52	1.26336	1.30838	1.06438	1.14282	1.1055	1.26627	1.11052
ANKRD20A3	0.125003	0.0955822	0.121009	0.163703	0.161266	0.185821	0.10105	0.105002	0.12946	0.114839	0.212	0.239342	0.0626502	6.1289e-06	0.116115
ANKRD20A3	0.112231	0.0898797	0.121159	0.154263	0.137619	0.169932	0.0976017	0.0581078	0.11948	0.101384	0.197155	0.190134	0.0623802	5.0583e-06	0.0951821
ANKRD20A3	0.128476	0.104815	0.120742	0.166992	0.166501	0.190393	0.100812	0.105446	0.130366	0.11453	0.214847	0.238796	0.0644331	6.14366e-06	0.119594
ANKRD20A4	1.34216	1.54505	1.45196	2.63717	2.32403	2.21576	2.52047	2.49428	1.99037	2.12851	2.08331	2.01048	1.9534	1.94641	2.14022
ANKRD20A5P	0.0442698	0.0195685	0.0729884	0.0210344	0.0618733	0.0301821	0.0896198	0.0361994	0.037669	0.0239027	0.0434183	0.0253553	0.0915629	0.0482159	0.0430795
ANKRD20A8P	0.116613	0.155181	0.0774129	0.248494	0.198642	0.211151	0.204417	0.246963	0.298859	0.159064	0.164317	0.304101	0.132259	0.235455	0.201659
ANKRD20A9P	0.0934767	0.0967353	0.0740153	0.0926681	0.121414	0.115188	0.0926589	0.116099	0.0995539	0.109171	0.0912231	0.086531	0.0869589	0.0829708	0.101767
ANKRD22	0	0	0	0	0	0	0	0	0	0	0	0	0	0	0
ANKRD23	2.33427	2.22626	2.28402	1.76924	2.18696	2.00018	1.94785	1.69812	1.82509	1.93094	2.19097	1.67805	1.99177	1.677	1.60401
ANKRD24	0.131839	0.0768499	0.195756	0.173456	0.196803	0.155276	0.0887736	0.129362	0.130797	0.17142	0.123783	0.123923	0.178295	0.0922214	0.128299
ANKRD26	3.74636	3.56539	3.53082	3.04923	3.11747	3.18246	3.22154	3.43282	3.29138	3.3028	3.03062	3.21734	3.25306	2.95194	2.94091
ANKRD26P1	0	0	0	0.00690557	0	0	0	0.00641932	0	0	0.000271684	0	0.00676691	0.00595055	0
ANKRD26P3	0	0	0	0.00209205	0	0	0	0.0135013	0	0	0.00959635	0	0.0113835	0	0
ANKRD27	10.3331	9.86761	10.4835	11.5333	11.4877	11.6641	11.6172	12.0554	11.5757	11.8191	12.0149	12.6126	12.2048	11.6857	12.3282
ANKRD28	33.2781	31.836	31.9708	40.2252	38.7452	39.1026	36.2885	36.4852	35.9578	35.1848	33.3411	34.179	33.8995	33.0488	32.7086
ANKRD29	0.225267	0.110622	0.307932	0.285631	0.218112	0.135328	0.349436	0.460615	0.242205	0.193844	0.212672	0.152825	0.291161	0.290114	0.203924
ANKRD30A	0	0	0	0	0	0	0	0	0	0	0	0	0	0	0
ANKRD30B	0	0	0	0	0	0.00790747	0	0	0	0	0	0	0	0.00217769	0
ANKRD30BL	0	0	0	0	0	0	0	0	0	0	0	0	0	0.0232153	0
ANKRD30BP2	0.0241309	0.0203169	0	0.0124222	0.00311347	0.010868	0	0.0118395	0.0259375	0.0235299	0.0105181	0.0163791	0.0374317	0	0.0352217
ANKRD30BP3	0	0	0	0	0	0	0	0	0	0	0	0	0	0	0
ANKRD31	0	0	0	0	0	0	0	0	0	0	0	0	0	0	0
ANKRD32	3.48027	3.02974	3.37958	4.35847	3.91201	4.35361	5.08354	5.40699	5.20681	4.2969	4.09231	4.25468	4.27674	3.95588	4.16024
ANKRD33	0	0	0	0	0	0	0	0	0	0	0	0	0	0	0
ANKRD33B	2.10727	1.98869	2.28783	1.00664	0.977486	0.939072	0.709471	0.628091	0.646924	0.904018	0.876332	0.729981	1.02615	0.952525	1.01939
ANKRD34A	0.773622	0.804614	0.812497	0.605442	0.748575	0.809531	0.746977	0.803771	0.58695	0.608922	0.674427	0.729775	0.682382	0.548286	0.786023
ANKRD34B	0	0.00874761	0	0.00987228	0.0321672	0.0187147	0	0	0	0.0195122	0	0.0211584	0	0.00944754	0
ANKRD34C	0	0	0	0	0	0	0	0	0	0	0	0	0	0.00674858	0
ANKRD35	0	0	0	0	0	0.0110579	0	0	0	0	0	0	0	0	0.0119455
ANKRD36	2.24273	2.06692	1.90441	1.85959	2.12524	2.3558	2.06567	2.00142	2.0621	2.15391	1.74007	1.75892	1.74917	1.84627	1.79931
ANKRD36B	2.01427	2.0787	2.15444	1.93958	2.04928	2.16853	1.9628	1.99494	1.80492	1.76443	1.68713	1.80078	1.82084	1.77162	1.88493
ANKRD36BP1	2.52771	1.71012	2.57549	3.16906	3.17307	3.59863	2.66537	2.71317	2.76917	2.50543	2.75801	2.25893	2.85771	2.79139	3.21674
ANKRD36BP2	0.0662801	0.0618024	0.110323	0.0377346	0.100372	0.0416208	0.0913474	0.062971	0.104103	0.0434625	0.0273904	0.0259286	0.0325836	0.0284102	0.0785098
ANKRD37	5.0424	4.5127	4.86125	3.58268	3.16737	3.7783	3.53444	2.79347	2.94608	2.86642	3.26681	3.3212	3.54776	3.94539	3.752
ANKRD39	14.285	13.394	14.6417	11.4777	13.9091	12.3917	10.6051	12.2062	12.1013	10.9556	12.377	11.5165	12.7775	13.6363	14.095
ANKRD40	36.4506	35.6576	34.9454	27.4176	28.0385	27.4324	34.6187	34.9884	32.275	32.6525	31.6941	31.9952	32.8589	32.4111	33.0236
ANKRD42	2.17598	2.00498	1.69185	1.43999	1.5554	1.39426	1.36971	1.32483	1.59286	1.44507	1.42149	1.45774	1.68529	1.39531	1.66571
ANKRD44	3.59331	3.84926	3.75249	3.43834	3.44644	3.43131	3.93444	3.97241	4.22794	4.28177	4.02396	4.06676	3.18148	3.58129	3.42002
ANKRD45	0.314649	0.172183	0.212543	0.254267	0.207112	0.283483	0.31	0.339671	0.456652	0.369259	0.493644	0.192161	0.260294	0.185946	0.183679
ANKRD46	6.50449	7.58892	7.93089	5.8544	5.13608	5.19665	5.29004	5.3326	5.421	4.98065	5.3408	5.33699	4.52177	5.01191	4.66419
ANKRD49	7.19948	7.2146	7.01234	6.89264	6.87143	7.37497	6.8845	6.37157	6.24293	6.69297	6.2098	6.88237	5.93142	5.23522	5.53538
ANKRD50	11.7997	11.4482	11.7359	12.2549	11.8182	12.3978	11.8833	12.3374	12.1605	11.6392	11.6258	11.6608	12.8171	12.5987	12.3
ANKRD52	26.1516	26.5151	26.5156	27.7463	29.0466	28.357	25.7331	25.7797	25.6	23.6187	24.9392	23.527	28.7971	29.2125	28.6436
ANKRD53	0.152075	0.0365737	0.219453	0.115722	0.0841607	0.146199	0.15545	0.0639752	0.196242	0.209403	0.141369	0.123803	0.104838	0.157984	0.169058
ANKRD54	9.51487	10.2717	10.9414	8.93535	9.11901	9.18663	9.34598	9.41983	10.2541	9.20671	9.82931	9.53652	9.98665	9.84603	10.2262
ANKRD55	0.0531421	0	0.0326328	0.016077	0.0261907	0.0152351	0.0185118	0.0165947	0.0363574	0.0317482	0.0454385	0.0172093	0.0185773	0.018447	0.0164504
ANKRD6	2.71128	2.70456	2.80269	2.52595	2.48225	2.50436	3.25021	3.2315	3.46976	2.76116	2.62915	2.98462	3.10372	2.79432	2.80716
ANKRD61	0.447455	0.618674	0.585762	0.395616	0.842685	0.576469	0.630625	0.690409	0.550153	0.569765	0.528868	0.55237	0.792975	0.609891	0.652589
ANKRD62P1-PARP4P3	0	0	0	0	0	0	0	0	0	0	0	0	0	0	0
ANKRD63	0	0	0	0	0	0	0	0	0	0	0	0	0	0	0
ANKRD65	0	0.022918	0	0	0.015137	0.048491	0.0597033	0.0267341	0	0.0366863	0.0474629	0.0554104	0.056331	0	0
ANKRD66	0	0	0	0	0	0	0	0	0	0	0	0	0	0	0
ANKRD7	0.811326	0.995747	0.684746	0.710271	0.681697	0.884209	1.0748	0.730288	0.872917	0.888038	0.794843	0.85906	0.733865	0.583609	0.657326
ANKRD9	9.82542	10.4046	9.05842	8.77824	9.29232	9.05581	7.79726	7.44279	8.00715	9.19791	8.96424	7.9325	7.66808	9.2529	9.85041
ANKS1A	8.81989	9.07205	8.81716	8.86232	9.27482	9.07592	9.49525	9.40102	9.34911	9.82882	9.81137	9.40726	8.30084	8.76813	8.42496
ANKS1B	3.13884	3.28331	2.99754	3.32318	3.59477	3.46311	9.8632	9.8159	9.70153	4.28826	3.92927	3.74589	7.36551	7.35522	6.84566
ANKS3	6.32831	7.29944	6.98945	7.79207	7.77894	8.17889	7.43796	7.46973	7.47387	7.55963	7.02791	7.47675	7.09827	7.83738	7.15676
ANKS4B	0.00179494	0	0	0	0	0	0	0	0	0	0	0	0	0	0
ANKS6	5.56926	5.51059	5.25902	6.64734	6.7483	6.90673	7.44766	7.40746	7.08307	6.78808	7.38448	6.76371	6.84333	7.17171	6.92334
ANKUB1	0	0	0	0	0	0	0	0	0	0	0	0.0174147	0	0	0
ANKZF1	7.72938	8.52228	9.05315	7.1326	7.70869	7.56917	6.7576	6.80921	7.25693	6.87427	7.37186	7.23642	7.38568	6.69144	6.76605
ANLN	74.2693	72.3079	72.6198	91.8074	88.3028	91.725	92.3027	94.1404	92.7908	83.2605	79.2412	82.1111	92.986	91.1567	91.1229
ANO1	6.20369	6.02434	5.85525	5.62896	5.83811	5.89128	4.284	4.19821	4.24297	6.22596	6.51077	6.46887	5.40876	4.74995	5.18909
ANO10	30.0996	27.7702	29.0921	22.8707	21.7281	21.8985	23.1156	21.9685	22.8862	21.7911	22.1156	21.4535	23.6536	23.1959	23.6441
ANO2	0	0	0	0	0	0.0107683	0	0	0.0118615	0	0	0	0	0	0.0107391
ANO3	0.0270271	0.0455152	0.0652168	0.211801	0.130708	0.121684	0.0591288	0.0331456	0.0363044	0.133261	0.064809	0.103231	0.020964	0.0184348	0.0328811
ANO4	0.0115471	0.00833347	0	0	0.00113647	0	0	0.00971146	0.0106374	0	0	0.0201573	0.0102357	0	0
ANO5	1.53569	1.55533	1.43954	1.84459	1.75886	1.85253	1.30549	1.25909	1.45663	1.04763	1.26069	1.00792	1.15391	0.987319	1.04133
ANO6	12.631	12.8013	13.156	11.6816	12.0053	11.8915	13.5176	13.1769	13.3636	13.2375	13.0674	12.8296	12.3905	12.4444	12.6821
ANO7	0.385213	0.565518	0.362249	0.337865	0.313445	0.391414	0.378257	0.339206	0.350317	0.287535	0.439182	0.432497	0.439234	0.368259	0.40371
ANO8	7.98619	8.62534	8.2936	7.96602	8.09987	7.74843	6.82797	6.83429	6.93198	6.53615	7.47794	6.61789	7.71591	7.866	7.44225
ANO9	0.421276	0.330213	0.266353	0.124281	0.12373	0.196304	0.063603	0.0285116	0.046848	0.081834	0.0506487	0.0443625	0.105153	0.0528316	0.183744
ANP32A	43.0284	43.6408	41.2209	33.7227	32.8499	32.9698	43.3676	40.9355	42.5848	42.9337	44.9432	43.7911	41.2361	40.9341	41.3662
ANP32A-IT1	0.0504171	0.0530598	0.0243279	0.0479174	0.0585479	0.068122	0.0275885	0.086579	0.0270964	0.0473396	0.0109875	0.0256647	0.0130343	0.0343821	0.0122646
ANP32AP1	0.410125	0.392382	0.520613	0.410831	0.199319	0.233134	0.459232	0.67607	0.304406	0.714106	0.621136	0.522667	0.342491	0.618395	0.542317
ANP32B	192.408	194.383	194.991	182.391	186.395	183.521	204.759	205.032	204.719	213.239	212.815	210.184	195.264	194.067	199.309
ANP32C	0.00524122	0.214843	0.0162314	0.150378	0.204039	0.188415	0.331637	0.0257694	0.190704	0.0736306	0.0683147	0.26549	0.0162417	0.00792524	0.247967
ANP32D	0	0	0	0	0.0237792	0.192681	0	0	0	0.0984483	0	0	0	0	0
ANP32E	30.4285	30.5038	29.8429	27.3194	26.658	26.8671	32.9443	31.7792	31.0821	29.7289	29.5936	30.5668	34.1084	33.7182	34.2401
ANPEP	35.6769	37.4533	36.5779	21.9717	22.8009	22.6339	43.8281	42.2795	43.6038	32.205	33.7175	32.3145	51.1559	51.9514	50.577
ANTXR1	43.856	43.8079	45.0607	63.0332	64.1121	65.4475	46.1988	46.0948	45.3252	56.9133	57.4427	56.4875	46.8319	48.5598	47.3598
ANTXR2	14.9616	15.0944	15.3574	14.7552	15.8631	15.6021	24.2599	25.2536	25.5307	17.836	17.5364	18.1015	23.4736	21.7838	22.9999
ANXA1	204.012	196.574	202.778	220.299	211.685	216.766	216.488	229.793	223.574	228.478	220.792	228.027	204.883	199.318	201.985
ANXA10	0	0	0	0	0	0	0	0	0	0	0	0	0	0	0
ANXA11	38.7242	38.9352	39.1788	27.4258	29.2276	28.4967	29.9432	28.8051	27.7406	31.6293	31.9225	31.2365	31.1098	33.8004	33.4187
ANXA13	0.0307631	0.0258909	0.118708	0	0	0.0554843	0.0674393	0	0	0.115467	0.026793	0.031277	0.0318024	0.0279548	0
ANXA2	612.959	616.396	622.31	656.678	652.61	667.222	800.332	813.639	806.051	673.453	665.566	668.6	744.612	737.648	750.985
ANXA2P1	0.155435	0.187127	0.257683	0.288949	0.370081	0.325383	0.402205	0.285889	0.423759	0.36179	0.334785	0.237712	0.20726	0.224073	0.272469
ANXA2P2	2.11666	2.41618	2.04553	1.96657	2.5005	1.822	1.8997	2.4045	1.67371	2.09311	1.81966	2.34128	2.17703	2.18247	3.16423
ANXA2P3	0.0890017	0.0621798	0.242451	0.0188956	0.0439684	0.0860691	0.0643368	0.13768	0.0818715	0.0403656	0.0383156	0.251618	0.107827	0.108145	0.101502
ANXA2R	1.3589	1.2981	0.779299	1.18952	0.883266	0.960803	1.89293	2.09191	2.01554	1.55039	0.831442	1.30635	2.27787	1.83523	1.64233
ANXA3	0	0	0.0531065	0.0523938	0.0640093	0.12408	0.0301606	0	0.0296059	0.0258296	0.0479533	0.055983	0	0	0.0535339
ANXA4	43.6829	43.1434	45.3987	37.3516	37.852	40.7483	37.3318	39.3534	37.4423	44.947	44.3722	44.622	42.9703	41.6778	41.2222
ANXA5	511.643	514.958	515.753	471.494	454.521	461.039	604.368	610.955	614.522	518.66	501.823	509.544	625.248	608.002	624.098
ANXA6	20.643	22.087	20.9142	19.3978	19.7114	19.2335	21.7066	22.1762	21.6989	23.0437	24.5313	23.4723	20.8793	20.8878	20.1196
ANXA7	54.0574	53.9082	54.3654	46.1609	44.1861	44.9879	43.3323	43.4626	42.8772	47.6285	44.7353	46.9472	43.8748	44.3394	46.0936
ANXA8	0	0	0	0	0	0	0.00352301	0	0	0	0	0	0	0	0
ANXA8	0	0	0	0	0	0	0	0	0	0	0	0	0	0	0
ANXA8L1	0	0	0	0	0	0	0.000110516	0	0	0	0	0	0	0	0
ANXA8L1	0	0	0	0	0	0	0	0	0	0	0	0	0	0	0
ANXA8L2	0	0	0	0	0	0	0	0	0	0	0	0	0	0	0
ANXA9	0.408081	0.242471	0.208436	0.365427	0.33484	0.259654	0.210367	0.235641	0.154894	0.135177	0.188226	0.244183	0.198551	0.28364	0.233472
AOAH	0.0363236	0.0305789	0.0200269	0.0345408	0.0538434	0.0163635	0.076114	0.0356503	0.0757226	0.0489455	0.0158261	0.0353734	0.071883	0.0495347	0.0530073
AOAH-IT1	0	0	0	0	0	0	0	0	0	0	0	0	0	0	0
AOC2	0.527885	0.49126	0.791378	0.771535	0.539688	0.670735	0.779116	0.742921	0.508638	0.370164	0.554837	0.545787	0.60743	0.750254	0.537041
AOC3	0.192739	0.119576	0.0979038	0.154223	0.141332	0.127908	0.155395	0.218979	0.114478	0.0952586	0.0972838	0.0929667	0.181839	0.166042	0.197435
AOC4	0	0	0	0	0	0	0	0	0.0156493	0	0	0	0	0	0
AOX1	0.352283	0.338014	0.308385	0.350244	0.336029	0.30249	0.224071	0.514446	0.325764	0.315448	0.292874	0.36712	0.36433	0.365071	0.350824
AOX2P	0.00156939	0	0	0	0	0.00989473	0	0	0	0	0	0	0	0	0
AP1AR	14.1093	13.4312	14.157	12.5649	12.3281	12.3347	13.1687	13.1963	12.3829	13.1289	12.9888	13.941	13.4931	13.9313	13.9492
AP1B1	20.593	20.2969	19.8372	18.2067	19.0291	18.6371	18.739	18.4517	18.8468	18.8449	19.6808	19.0382	22.3681	22.384	21.9156
AP1B1P1	0	0	0	0	0	0	0	0.0619128	0	0	0	0	0	0	0
AP1G1	14.5444	13.856	13.512	13.2288	14.0317	13.8622	13.8732	14.1852	14.2476	13.8544	13.5923	13.4627	13.3825	13.8407	13.8048
AP1G2	1.82968	1.8216	1.77969	2.29143	2.81099	3.11351	2.1458	1.82406	2.20103	1.36339	1.58218	1.59645	1.26137	1.38631	1.20095
AP1M1	41.145	44.2422	42.7359	42.8965	43.6738	44.4318	42.5713	42.5653	41.7165	44.0016	45.7952	43.291	44.4523	45.7257	46.4279
AP1M2	0	0.0423291	0	0	0	0	0	0	0	0.00589948	0	0	0	0.0228533	0
AP1S1	83.6618	81.0566	81.6215	70.7161	73.7447	74.5994	80.1563	80.2292	78.5168	83.4381	85.368	82.5873	83.2163	85.8421	83.6973
AP1S2	42.6804	41.5441	40.9052	31.4542	30.7581	31.2168	46.9702	44.8167	47.1419	36.4741	33.706	36.0786	40.7072	38.2921	38.8828
AP1S3	3.10254	3.11188	3.16179	3.57839	3.28618	3.37339	5.00284	4.80673	4.72027	3.47408	3.39	3.61652	4.40118	3.64261	4.22096
AP2A1	30.5257	31.5096	31.3391	32.7444	34.2383	33.3173	29.715	28.907	30.1279	30.6663	32.7004	30.5556	33.7389	33.3041	33.3146
AP2A2	15.2332	15.8881	15.7328	15.2747	15.7564	14.8763	16.0627	15.157	15.6469	15.1738	16.126	15.5277	16.3442	17.0359	17.0171
AP2B1	72.79	69.9365	71.715	70.0907	70.1521	70.7032	76.4939	75.7001	76.809	72.4204	70.7609	72.411	73.8278	73.2517	72.1646
AP2M1	202.577	208.559	207.93	204.169	210.28	207.7	225.75	223.478	221.541	221.388	225	228.382	237.861	237.575	238.921
AP2S1	112.727	118.167	116.918	106.613	112.353	111.559	118.138	110.324	114.507	117.772	120.643	116.127	114.071	112.164	114.835
AP3B1	14.9455	13.9635	14.1116	14.9031	14.2135	14.7184	16.532	17.0193	17.4214	16.1614	15.5831	15.503	15.8645	15.559	16.1291
AP3B2	2.2286	2.38064	2.3245	2.25407	2.4233	2.35389	1.62923	1.90234	1.78931	1.59356	1.93081	1.67441	2.01554	1.99378	1.81612
AP3D1	47.3121	48.9506	48.0877	42.77	43.8066	42.2145	48.2854	48.9729	48.6361	48.2641	50.4117	48.4367	54.7358	55.0811	55.8054
AP3M1	15.4998	15.3291	15.4855	14.9346	14.3167	14.7012	13.3321	14.0043	13.5314	14.4978	14.2445	14.075	13.2384	12.9813	13.6404
AP3M2	11.5872	11.2985	10.8933	10.604	10.7563	11.4988	11.499	11.4465	10.8613	10.9154	10.9564	11.4904	11.0273	10.8636	11.0294
AP3S1	28.7266	27.757	29.3275	28.1015	28.5843	28.0255	30.8198	30.7776	31.1279	31.3235	29.5957	31.4602	27.6793	27.8632	27.8564
AP3S2	7.25622	7.05443	7.46025	6.196	5.87056	6.8026	6.42049	6.85582	6.12041	7.13911	6.39599	6.5482	6.61588	6.7265	6.55339
AP4B1	7.07514	6.84573	6.69908	6.12954	5.85413	6.40801	6.37521	5.90625	5.70468	6.34425	6.75528	6.18014	5.36425	5.85691	5.85297
AP4B1-AS1	0.406805	0.342416	0.220763	0.48388	0.492637	0.435485	0.362119	0.424314	0.300797	0.286337	0.531603	0.284466	0.473166	0.346628	0.173092
AP4E1	5.58655	5.46909	5.49408	5.15005	5.50715	5.2166	5.6787	5.20816	5.34356	5.24574	5.31444	5.27025	5.28222	5.17841	5.18248
AP4M1	8.66898	8.81166	9.27692	7.44724	7.63195	7.8139	9.08636	10.035	9.95092	7.03986	9.12064	8.03433	7.73098	7.96456	8.54535
AP4S1	1.91231	2.12702	1.77953	1.59489	1.57212	1.50749	1.48698	1.38745	1.37058	1.64335	1.64652	1.7819	1.57469	1.32754	1.48091
AP5B1	8.42814	8.78051	8.95723	8.02835	8.47621	8.36362	8.24461	8.05771	8.24932	7.3637	7.58185	7.19623	8.92556	8.71583	8.32702
AP5M1	8.31197	7.83603	8.57954	8.11122	8.72919	8.67616	7.78226	8.18991	8.24355	7.52761	7.59081	7.8407	8.06371	7.16144	7.62457
AP5S1	16.0882	17.7152	17.0315	14.8168	15.354	14.2231	14.061	13.6051	14.4443	14.2459	14.9503	14.1352	15.9079	17.2536	17.3581
AP5Z1	8.7235	9.11268	9.28507	7.16299	7.46106	6.73323	6.44165	5.97045	6.33586	6.63903	7.25379	7.22223	7.34369	7.76775	7.09529
APAF1	3.6277	3.74024	3.28843	3.3955	3.4083	3.29469	3.75283	3.57583	3.84047	3.24449	3.35214	3.27724	2.93051	3.38169	2.98466
APBA1	6.36136	6.66055	6.73184	3.02736	3.0197	2.78176	3.23317	3.10241	2.96758	3.92192	3.8107	4.06182	3.09471	2.7821	3.08962
APBA2	6.7333	7.45723	7.07625	6.97076	6.50745	6.51785	5.48626	5.55435	5.79983	6.02325	7.05404	6.26389	6.10236	6.61052	6.47519
APBA3	6.72021	7.64888	7.6545	6.24013	6.13004	5.84107	5.2762	5.95199	5.64386	5.59901	6.09868	5.84677	6.66082	6.21745	6.80153
APBB1	20.1887	21.4199	20.5056	20.4083	20.1214	20.5209	19.8369	20.1145	19.4026	21.9226	20.9249	19.675	21.3946	20.574	19.4242
APBB1IP	0	0	0	0	0	0.0143732	0.0349283	0	0	0.00136158	0	0	0	0	0.00517372
APBB2	2.90755	3.06416	2.95531	3.91151	3.94566	4.03688	3.06736	3.1823	3.19394	3.29581	3.52963	3.55674	3.02625	2.95183	2.88996
APBB3	2.85408	3.07219	2.66389	2.55037	2.52087	2.49795	2.94836	2.5869	3.07843	2.80853	2.63494	2.439	2.18544	2.30936	2.17145
APC	4.81474	4.91569	4.70392	4.2686	4.29864	4.36479	4.82543	4.66166	4.74964	4.40515	4.24131	4.55914	4.24884	4.3078	4.24655
APC2	0.175094	0.235909	0.255399	0.332552	0.352178	0.311774	0.328718	0.286284	0.313555	0.24852	0.247711	0.229911	0.317923	0.311431	0.35602
APCDD1	12.5445	13.984	13.0741	24.965	25.3284	23.1388	15.211	15.6556	15.2561	20.294	21.4935	22.3017	23.4408	24.037	23.4907
APCDD1L	0.0133391	0.0112305	0	0	0	0.0120161	0.00243322	0.0130898	0.0430156	0	0.0132887	0	0	0.0121286	0
APCDD1L-AS1	0	0.0172881	0	0	0	0	0	0	0	0	0	0	0	0	0.0199772
APCS	0	0	0	0	0	0	0	0	0	0	0	0	0	0	0
APEH	70.0472	70.1301	69.2673	72.5008	71.4687	73.627	64.1524	64.5848	65.9748	76.029	78.1389	78.2781	72.1904	73.5755	72.7723
APEX1	103.426	104.753	103.76	104.727	106.793	105.892	111.291	110.886	111.688	115.211	116.244	118.041	110.527	111.545	112.728
APEX2	18.6931	19.1011	17.9771	16.3161	17.1915	17.6041	17.3689	17.5835	16.6814	16.2787	17.2705	16.307	16.6856	18.204	17.7384
APH1A	37.6714	37.8351	38.313	40.0669	40.7665	42.944	40.5411	41.2098	40.3462	41.7993	41.912	41.4489	39.6629	38.755	40.0662
APH1B	10.8247	9.95372	9.88814	8.30458	8.4957	8.36377	7.91376	7.864	7.76928	8.37945	7.64053	8.45767	8.33836	7.83049	8.20661
API5	41.9917	40.0995	39.9341	44.3076	43.5033	46.4847	45.6792	46.9388	46.5286	48.5922	45.0193	49.1623	45.2022	45.048	44.1102
APIP	29.8472	31.3927	30.3931	31.3414	29.4291	32.8011	28.8149	27.8575	28.9915	32.13	30.0962	31.1844	26.4916	29.5098	28.8166
APITD1	17.0582	15.7882	16.9264	14.7562	14.7141	16.6701	17.6888	17.5118	16.6413	15.092	14.8422	16.6425	17.9599	16.0578	16.5463
APITD1-CORT	1.25538	2.041	1.14726	1.39088	1.19016	1.11693	1.72951	1.53099	1.71487	2.00095	1.89055	1.57504	1.52049	1.88775	1.82148
APLF	1.8718	1.61181	1.89887	1.48559	1.36243	1.6284	1.59432	1.45054	1.70317	1.52798	1.42787	1.24536	1.46279	1.64406	1.56276
APLN	0.346758	0.367636	0.322248	0.598114	0.517032	0.416476	0.42167	0.441094	0.441755	0.31353	0.291079	0.392252	0.690613	0.537169	0.52486
APLNR	0.0223533	0	0	0	0	0	0.0115515	0	0.0113464	0.0209809	0	0.0107495	0	0	0
APLP1	12.8757	14.1604	14.0917	22.4409	23.8008	21.5469	16.9569	16.8648	16.4629	17.4654	19.3921	19.9888	20.3246	22.326	20.1357
APLP2	163.852	161.833	165.007	216.228	214.333	219.448	223.991	226.156	225.544	203.527	202.014	205.069	212.793	213.453	215.125
APMAP	132.01	135.176	135.118	120.037	120.866	117.797	119.992	118.957	119.945	133.77	134.79	136.669	121.677	119.534	121.736
APOA1	0	0	0.0545096	0	0	0	0	0.166692	0	0	0.0491868	0	0	0	0.164773
APOA1BP	33.0523	34.1192	32.5309	29.8179	28.2993	31.1335	29.1832	29.9962	28.2403	28.6618	29.6234	26.6523	33.414	33.3119	34.7929
APOA2	0	0	0	0	0	0	0	0	0	0	0	0	0	0	0
APOA4	0	0	0	0	0	0	0	0	0	0	0	0	0	0	0
APOA5	0	0	0	0	0	0	0	0	0	0	0	0	0	0	0
APOB	0	0	0	0	0	0	0	0	0	0	0	0	0	0	0
APOBEC1	0	0	0	0	0	0	0	0	0	0	0	0	0	0	0
APOBEC2	0.108859	0.0229064	0.0525089	0.0259012	0.0632868	0.0736082	0.119281	0.0534357	0.0292721	0.0255391	0.047414	0.027677	0	0.0742004	0.0264658
APOBEC3A	0.0109485	0.098833	0.0756425	0.0124874	0.0424644	0.0303294	0.0312699	0.0726679	0.026505	0.0778979	0.0143011	0.0245083	0.0610556	0.0375022	0.0547553
APOBEC3A_B	0.326065	0.519741	0.478104	0.272279	0.226337	0.398591	0.416854	0.287654	0.242162	0.325201	0.27384	0.340981	0.557608	0.297259	0.522663
APOBEC3B	13.2799	14.6756	12.9713	12.6097	12.6028	11.4737	11.9913	13.7215	13.8792	12.3744	11.9043	11.7686	13.4868	15.3356	12.3378
APOBEC3C	10.2802	8.07192	8.57453	8.96901	8.91217	8.92014	7.15117	6.61392	6.98448	7.52945	8.71652	10.2157	8.25341	8.91573	8.43176
APOBEC3D	0.154795	0.199028	0.108634	0.216755	0.209251	0.220619	0.217229	0.226497	0.0998517	0.182313	0.171705	0.189055	0.212449	0.148918	0.106787
APOBEC3F	1.76863	1.62771	1.35403	1.5964	1.06461	1.93846	1.55571	1.63888	1.30822	1.45666	1.39378	1.65143	1.17054	1.43265	1.11855
APOBEC3G	3.00594	3.1126	3.15905	2.75402	2.7546	2.73103	2.30347	2.18964	2.45659	2.61971	2.61893	2.39039	2.63925	2.73218	2.57556
APOBEC3H	0	0.076332	0	0	0	0	0	0.00379047	0	0.0850018	0	0	0	0	0
APOBEC4	0	0	0	0	0	0	0	0	0	0	0	0	0	0	0
APOBR	0	0.0181941	0.0104276	0.0308014	0.0167268	0.019463	0.0709374	0.0424073	0.0464512	0.0405831	0.0282584	0.0220032	0.0893886	0.0687743	0.0525709
APOC1	0.623917	0.392891	0.300006	0.150281	0.36682	0.141739	0.863789	0.15377	0.168762	0.43696	1.08034	0.157131	0.643617	0.299965	0.301835
APOC1P1	0	0	0	0	0	0.0837607	0	0	0	0	0	0	0	0	0
APOC2	0.149921	0	0.288915	0.0716652	0.11669	0.0677769	0.164927	0	0.0808	0.210644	0	0.227886	0.0774349	0	0.0727578
APOC3	0	0	0	0	0	0	0	0	0	0	0	0	0	0	0
APOC4	0	0.0808824	0.185339	0	0	0	0	0	0	0	0	0	0	0.0872503	0
APOC4-APOC2	1.22026e-07	2.53574e-08	6.81324e-07	1.35533e-07	6.77197e-08	1.0079e-07	1.04676e-07	0	1.53197e-07	7.17202e-08	0	9.03979e-08	1.41542e-07	3.44693e-08	1.55835e-07
APOD	28.2573	31.1584	30.3003	60.3344	61.5672	59.8654	54.8764	56.9035	56.8829	59.4614	57.9538	59.1195	53.4437	54.6308	53.8606
APOE	1.87972	1.81732	1.96709	1.06707	1.58281	1.08256	2.36895	1.88542	2.58252	1.05036	1.04453	1.3003	2.89374	2.39791	2.52677
APOF	0	0	0.0252767	0	0	0	0	0.0257213	0	0	0	0	0	0	0
APOH	0	0	0	0	0	0	0	0	0	0	0	0	0	0	0
APOL1	7.49307	7.6622	7.2996	6.05264	5.60422	6.04481	3.00094	2.79254	3.04511	4.19365	4.14145	4.03301	3.87106	4.20064	4.51522
APOL2	15.5213	14.8468	15.5736	10.942	9.93993	11.3114	9.69429	9.77815	9.50211	10.4073	9.93598	9.52022	10.5541	9.90495	10.387
APOL3	6.16939	7.33664	6.9467	5.40349	5.66835	5.31229	3.39459	3.37029	3.11963	4.4905	4.114	4.89905	5.3572	4.47298	4.83736
APOL4	0.0256667	0.0567279	0.0536704	0.036593	0.0280476	0.0115593	0.0280904	0.0355518	0.0389427	0.0361506	0.0335621	0.0614793	0.0265423	0.0233379	0.0470064
APOL5	0	0	0	0	0	0	0	0.0310229	0	0	0	0	0	0	0
APOL6	4.84623	4.81245	4.69381	4.69466	4.57632	4.7945	3.86844	4.10073	3.67513	3.93722	3.96477	3.99854	4.49457	4.58233	4.41392
APOLD1	1.0599	0.720989	0.791996	0.560327	0.575512	0.708181	0.682655	0.685143	0.624652	0.602034	0.782527	0.74863	0.813266	0.816179	0.973279
APOM	1.45718	1.80751	1.99021	1.53906	1.31127	2.01495	1.09261	1.65238	1.80265	1.14488	1.67065	1.93355	1.50926	1.38128	1.92734
APOM	0	0	0	0	0	0	0	0	0	0	0	0	0	0	0
APOM	0	0	0	0	0	0	0	0	0	0	0	0	0	0	0
APOM	0	0	0	0	0	0	0	0	0	0	0	0	0	0	0
APOM	0	0	0	0	0	0	0	0	0	0	0	0	0	0	0
APOM	0	0	0	0	0	0	0	0	0	0	0	0	0	0	0
APOM	0	0	0	0	0	0	0	0	0	0	0	0	0	0	0
APOO	30.573	29.5072	27.1784	27.0369	26.8114	28.4417	26.0525	28.1031	26.8326	28.0894	28.2918	29.003	26.5432	28.1773	25.3768
APOOL	7.15793	6.68674	7.0005	6.39061	6.53105	6.62784	6.30196	6.1814	6.39172	6.24611	6.26507	6.25705	6.12615	6.04505	6.14885
APOPT1	13.3958	13.1516	13.8443	14.6367	13.711	13.3482	14.2347	15.0138	14.6597	15.3346	14.5955	14.7277	13.4166	15.6768	14.7505
APP	491.503	485.139	492.825	519.074	526.283	518.993	518.739	522.74	524.08	549.088	558.012	551.212	515.414	516.861	509.763
APPBP2	10.2252	10.4371	10.1659	12.4851	12.3938	12.1267	11.7729	12.1546	11.6388	11.2175	11.3664	11.5742	11.1826	11.6105	11.0633
APPL1	15.7698	15.4617	15.4756	16.2265	15.8233	16.4808	15.9922	16.6235	15.4858	16.1616	15.5007	15.3467	16.3232	16.1122	16.2658
APPL2	16.3523	15.5851	16.1888	16.3487	15.4945	15.4193	16.9692	17.5176	18.092	18.0283	17.1189	18.1212	15.4704	15.7236	15.8241
APRT	59.5171	61.4379	64.2478	60.9893	66.0537	61.5177	63.6877	62.6595	63.4471	67.3675	71.1184	70.4423	67.4518	68.2372	68.4137
APTX	11.064	9.92273	10.6579	10.7934	10.4475	10.8273	10.5416	12.5264	12.4073	11.8774	10.5525	11.8262	11.4717	11.368	11.4656
AQP1	10.7245	11.4011	10.2216	4.85469	5.06927	5.38486	1.02805	1.40088	1.44245	15.9419	15.6251	16.1903	3.49217	3.03615	3.5405
AQP10	0	0	0	0	0	0	0	0	0	0	0.0213509	0	0	0	0
AQP11	1.19601	1.15784	1.01938	0.91	0.911071	1.14967	0.856171	1.01738	1.0288	0.879438	0.764298	0.689626	1.05116	1.05099	1.10527
AQP12A	0	0	0	0	0	0	0	0	0	0	0	0	0	0	0
AQP12B	0	0	0	0	0	0	0	0	0	0	0	0	0	0	0
AQP2	0	0	0	0	0	0	0	0	0	0	0	0	0	0	0
AQP3	0.186594	0.157066	0.180027	0.133142	0.162664	0.168188	0.102196	0.0915822	0.125415	0.15324	0.162574	0.189818	0.0241156	0.106002	0.0226859
AQP4	0.00787217	0	0	0.00747846	0.00609216	0.0141828	0	0	0.00846009	0.0147909	0	0.0160402	0	0	0.00766152
AQP4-AS1	0	0	0	0	0	0	0	0.0174177	0	0	0	0	0	0	0
AQP5	0	0	0	0	0	0	0	0	0	0	0.0209011	0	0	0	0
AQP6	0.0475261	0.0133371	0.0152874	0.0150612	0.0736081	0.014273	0	0.0155472	0.0340618	0.0297463	0.0138078	0.0483744	0.0327633	0	0.0308262
AQP7	0	0	0	0	0	0	0	0	0	0	0	0	0	0	0
AQP7P1	0	0.0219463	0.0377337	0.0247753	0.0100905	0.0117405	0	0	0.0280194	0.0244752	0	0	0	0	0.0190229
AQP7P3	0	0	0	0	0	0	0.016901	0	0	0.343384	0.265384	0	0	0	0.118601
AQP8	0	0	0	0	0	0	0	0	0	0	0	0	0.036509	0	0
AQP9	0	0	0.0132899	0	0	0	0.015073	0.0810853	0.029607	0.0129302	0	0.0280388	0	0.0125214	0
AQPEP	0.00877253	0.00738644	0.0169338	0	0.00678929	0.0316012	0.0095977	0.0344294	0.00942788	0.0247148	0.0152973	0.00893385	0.00907243	0	0
AQR	7.46847	6.99339	7.198	6.00815	6.01461	6.14601	7.30991	7.65658	7.67724	7.79085	7.56319	7.71194	7.3189	7.0123	7.2531
AR	0.0440863	0.0494718	0.0378607	0.101978	0.113802	0.123588	0.134019	0.158726	0.131679	0.0644119	0.0726509	0.0848057	0.0658301	0.0513602	0.0508781
ARAF	32.2617	34.1314	32.7777	29.3766	33.1074	31.442	28.1505	28.718	27.3362	29.8405	30.9858	30.7417	29.3739	31.5687	30.5938
ARAP1	16.2189	16.1706	16.6503	15.6058	16.9476	15.44	14.3156	13.8288	13.3853	15.1982	15.8251	14.7698	14.1759	14.8812	13.6738
ARAP2	1.66056	1.59413	1.62894	2.17822	1.91252	2.04548	1.73934	1.6132	1.65066	1.35238	1.48579	1.52439	1.30345	1.5201	1.31092
ARAP3	12.5566	13.2781	13.4906	13.2271	13.8375	13.3718	15.5126	15.3705	15.4734	15.1267	15.4194	14.9859	14.5544	15.5878	15.4262
ARC	0.042417	0.0476149	0.109156	0.0940794	0.175161	0.152847	0.092855	0.111001	0.121591	0.0663757	0.135569	0.143932	0.0877261	0.0771331	0.233871
ARCN1	61.3208	60.4216	60.1336	60.9503	59.9626	60.8221	59.0421	58.2525	58.4616	63.7914	62.3197	62.213	58.2002	58.1268	58.9838
AREG	0.32071	0.142879	0.163753	0.305533	0.380554	0.27798	0.555856	0.42612	0.40602	0.324435	0.279231	0.370631	0.390011	0.377062	0.391219
AREG	0.32071	0.0793773	0.163753	0.305533	0.380554	0.266634	0.572408	0.42612	0.365418	0.277245	0.377782	0.31951	0.390011	0.377062	0.378993
ARF1	119.815	123.805	121.333	140.285	146.207	137.548	134.817	135.159	135.567	147.22	150.445	148.961	138.508	142.761	138.465
ARF3	52.389	54.527	51.8592	51.5177	51.3474	50.756	46.9576	47.633	48.2599	48.8521	48.7436	48.5265	51.5626	52.9685	52.1706
ARF4	184.485	182.252	182.339	179.391	173.62	181.659	152.251	152.832	147.113	179.601	176.575	179.582	142.922	138.629	142.751
ARF5	95.7452	100.665	96.6786	107.299	109.218	103.286	101.644	96.52	100.75	114.712	114.942	118.783	96.5899	102.616	99.3483
ARF6	125.082	126.278	125.161	130.746	131.735	131.459	129.48	129.077	128.701	130.211	126.406	126.056	143.035	144.668	144.39
ARFGAP1	30.9035	32.2826	32.618	30.9369	32.8753	31.6143	27.4605	28.3246	28.428	29.8006	30.076	30.4281	29.807	28.2267	28.8225
ARFGAP2	23.1752	23.0737	22.1364	21.4336	21.9465	21.8568	22.2957	21.8627	22.5969	22.2758	22.4333	22.2225	23.1268	23.688	23.8295
ARFGAP3	19.6156	19.616	19.95	20.6953	19.6731	19.8257	18.3532	19.1774	18.8271	19.844	20.9957	20.5683	17.781	18.935	18.3903
ARFGEF1	11.6146	11.219	10.6885	12.76	12.429	12.6915	12.6094	12.2921	12.7167	11.3197	11.1194	11.8135	12.6675	12.3959	11.8972
ARFGEF2	9.59348	10.1347	9.88439	10.7274	10.5543	10.8511	9.87149	9.90779	10.0441	10.2089	9.88945	10.1585	10.6751	10.6618	10.8537
ARFIP1	19.1736	19.2538	18.6536	22.8466	21.7417	22.3007	18.6253	18.4569	19.2899	21.2082	22.1548	21.5336	18.823	18.2658	18.0415
ARFIP2	10.6082	11.7641	11.6417	12.8617	12.388	12.6546	12.05	12.9939	12.7515	12.585	12.6764	12.8324	12.1598	12.1239	12.6584
ARFRP1	18.38	18.5936	18.4839	15.5031	16.5416	16.8499	14.1362	14.8801	15.1913	15.4618	16.6893	16.3145	16.1586	17.3115	16.8433
ARG1	0	0	0	0	0	0.0276829	0	0	0	0	0	0	0	0	0
ARG2	4.9242	4.97779	4.83553	4.60782	4.25613	4.10277	4.41047	4.12993	4.02433	4.21796	4.56576	3.852	3.77895	4.01848	4.04465
ARGFX	0	0	0	0	0	0	0	0	0	0	0	0	0	0	0
ARGFXP2	0.195126	0.0656792	0.037637	0.0743661	0.0908439	0.211255	0	0.0766539	0.0419977	0	0.0679515	0.039653	0.121015	0.0354531	0.151733
ARGLU1	48.0394	49.4946	46.5516	55.6046	56.948	58.0792	49.2811	52.2791	54.5772	49.7562	51.3442	49.285	41.6205	40.5189	42.8766
ARHGAP1	17.3545	18.5831	17.7035	17.9741	17.969	17.7552	18.5772	17.7478	18.1475	18.7059	19.0849	19.427	19.093	18.5762	18.6595
ARHGAP10	4.29818	4.1913	4.30544	4.07253	3.74911	3.79843	4.61504	5.00541	4.70801	4.21446	4.22092	4.38949	3.87158	3.98229	4.02337
ARHGAP11A	45.1657	44.376	44.7434	46.7149	45.9273	45.3109	58.3322	58.1096	58.2598	48.8367	49.5074	48.0144	57.5047	58.328	57.4615
ARHGAP11B	21.2089	21.6892	20.7352	23.5277	21.6297	22.2889	29.6962	26.9772	25.7796	21.4302	20.9226	21.8331	25.7873	24.688	24.4824
ARHGAP12	10.484	9.42878	10.2497	9.65007	9.121	8.9232	9.43464	8.58971	9.18726	9.77959	8.74586	9.66303	9.30711	9.59329	9.25951
ARHGAP15	0.72541	0.926424	0.603319	0.238018	0.290792	0.338236	0.137019	0.270113	0.188317	0.140856	0.37047	0.228988	0.336207	0.250087	0.194623
ARHGAP17	16.6103	16.9411	16.4579	16.7444	17.0645	17.5806	17.7961	18.3734	17.5126	17.6555	17.5128	17.8536	16.4664	16.6095	16.6228
ARHGAP18	5.97816	5.64017	5.97387	6.77732	6.44073	6.85812	5.61488	5.66984	5.91967	5.79023	5.96044	6.33834	5.20864	5.74624	5.82871
ARHGAP19	6.4875	6.28402	6.10705	8.98932	8.89521	8.55236	7.37384	7.62244	7.49619	7.45113	7.53532	7.00754	6.81114	7.18384	6.84997
ARHGAP19-SLIT1	2.94704e-22	0.135926	0.508099	2.69037e-06	0.0809086	0.12104	0.119959	3.09534e-05	0.000722556	2.95075e-11	0.152595	0.228717	8.91333e-16	8.04102e-07	0.273505
ARHGAP20	0.0203991	0.00572388	0	0.0258372	0.0684085	0.0183687	0.215734	0.113425	0.132126	0.0319323	0.0281789	0.0277041	0.0281307	0.0185519	0.026473
ARHGAP21	15.808	15.6707	15.4937	13.9721	14.0394	14.6876	19.2245	19.3869	19.3407	15.6723	15.2926	15.6533	18.4121	18.2199	19.3112
ARHGAP22	1.35837	1.43088	1.35704	2.76669	2.63945	2.55131	2.50903	2.74707	2.19803	2.00665	2.33068	2.25846	2.1857	2.52909	2.16546
ARHGAP23	9.78636	10.6564	10.3372	10.947	11.5893	10.9966	10.4219	10.8891	10.8137	10.3407	10.5484	9.72541	10.9962	11.4636	10.8319
ARHGAP24	1.13451	1.28	1.37294	1.22264	1.24329	1.32036	1.33481	1.297	1.05044	1.13098	1.24685	1.22714	1.59749	1.69042	1.53726
ARHGAP25	2.44759	2.10887	2.03331	1.63447	1.98349	1.84607	1.1838	1.48053	1.36117	1.75011	1.93642	1.75295	1.63349	1.37143	1.81589
ARHGAP26	0.922106	0.916212	0.806475	1.34797	1.22891	1.18022	1.39163	1.51952	1.54417	1.25757	1.26708	1.37373	1.18192	1.14506	1.0502
ARHGAP26-AS1	0	0	0	0	0	0	0	0	0	0	0	0	0	0	0
ARHGAP27	0.199346	0.255767	0.3909	0.348025	0.0515345	0.269685	0.221613	0.195743	0.278136	0.359203	0.231468	0.270187	0.139622	0.173922	0.229916
ARHGAP27	0.236271	0.167768	0.352518	0.395597	0.383209	0.222945	0.0364233	0.23184	0.0714912	0.218199	0.284445	0.230157	0.103037	0.120756	0.226116
ARHGAP27	0	0	0	0	0	0	0	0	0	0	0	0	0	0	0
ARHGAP27	0	0	0	0	0	0	0	0	0	0	0	0	0	0	0
ARHGAP28	0.792578	0.600019	0.617608	0.821976	0.776494	0.870856	0.859068	0.770483	0.898615	0.867273	0.754493	0.851679	0.646732	0.595154	0.778461
ARHGAP29	6.56058	6.2644	5.9652	12.0182	11.5139	12.2187	12.4439	12.8027	13.1295	9.45525	8.83952	9.43674	10.3173	10.8346	10.7065
ARHGAP30	0.0183616	0.0154603	0.0443082	0	0.00710548	0.00973098	0.100452	0.0212031	0.0197336	0	0.0160089	0.0110011	0	0.0250465	0
ARHGAP31	18.4564	17.7951	18.3911	13.3621	13.0872	13.0327	13.0007	12.8527	12.6933	14.6759	14.4756	13.8765	12.8481	13.1248	12.9432
ARHGAP32	7.02807	6.55506	6.51524	6.75213	6.66089	6.74958	7.33992	7.7247	7.35427	7.29787	7.26716	7.485	7.09125	6.42435	6.87157
ARHGAP33	5.69899	5.90752	5.90323	6.11595	6.518	6.33938	6.13131	5.74706	6.08159	5.29732	5.74558	6.29483	5.38652	5.39343	5.46962
ARHGAP35	28.9002	28.7543	27.9031	25.8417	26.6145	25.852	26.3787	26.0158	26.2208	27.7663	28.5408	28.6804	28.8357	29.2891	29.1679
ARHGAP36	0	0	0	0	0	0	0	0	0	0	0	0	0	0	0
ARHGAP39	4.44398	4.52405	4.51961	3.86355	4.26108	3.87073	4.14452	4.24804	4.23992	4.11035	4.37018	4.12203	4.72114	4.77921	4.98101
ARHGAP4	0.443255	0.385675	0.401214	0.374908	0.388209	0.309474	0.344057	0.31216	0.287226	0.298692	0.343859	0.427505	0.250015	0.205911	0.231476
ARHGAP40	0.0147315	0	0	0.0140039	0	0	0	0	0	0.0138311	0	0	0	0	0
ARHGAP42	2.82274	2.65412	2.9519	1.95061	1.72082	1.83365	2.12507	2.09807	2.14243	2.11215	2.03527	2.31654	1.60353	1.46427	1.40949
ARHGAP44	0.0191291	0.0483191	0.0184622	0.0181754	0.0222083	0.0172279	0.0104649	0	0.0102794	0.0269453	0.00972871	0.0292195	0.0197828	0.0173953	0.0279238
ARHGAP5	10.9445	10.7514	11.1167	11.6359	10.7843	10.9882	11.3509	11.8912	11.4332	10.7551	10.3756	10.8836	11.2523	10.3055	10.7744
ARHGAP5-AS1	2.10025	2.19408	2.34001	1.4142	1.09555	1.20859	1.70743	1.81357	1.48065	1.22291	1.79722	1.21445	2.0213	1.48049	1.58409
ARHGAP6	3.01504	2.6589	2.77936	1.02868	0.896741	1.00231	2.72301	3.05174	3.17393	1.84785	1.94962	1.80144	2.53771	2.65663	2.65715
ARHGAP8	0	0.123757	0	0	0.0228001	0.0530321	0.0322301	0	0	0	0	0.0298994	0.0281747	0	0
ARHGAP9	0.0206573	0	0.019932	0	0	0.0186169	0.0532727	0	0.0349795	0	0	0	0	0	0.0200939
ARHGDIA	332.45	346.093	345.534	275.608	294.398	283.747	290.86	284.322	287.716	302.959	318.189	299.459	357.793	371.828	360.353
ARHGDIB	0.694049	0.778726	0.706555	0.661257	0.65819	0.76531	1.35326	0.719488	0.871379	0.868037	0.805679	0.783597	0.677554	0.316432	0.434145
ARHGDIG	0.530538	0.535587	0.613782	0.354316	0.329731	0.383251	0.873868	0.834041	0.856961	0.497372	0.646208	0.700059	1.09652	1.20437	0.618485
ARHGEF1	27.1011	27.5605	26.8436	27.8064	28.7405	26.003	25.3108	23.7473	24.9429	25.3427	28.4728	26.1843	24.1554	25.3945	25.0379
ARHGEF10	15.8904	15.8987	15.7052	23.117	23.4354	22.7133	20.5094	20.6696	19.9223	20.0793	20.5056	20.2856	18.4072	18.8652	18.7639
ARHGEF10L	3.38095	3.57175	3.09039	2.76023	2.64987	2.76039	2.31881	2.23492	2.25411	2.30781	2.35153	2.10756	2.8631	3.12375	2.70038
ARHGEF11	24.1706	24.2003	23.6982	21.1391	21.0622	20.897	16.9237	17.699	17.5287	16.8845	17.2015	17.4258	17.5607	18.1752	17.8794
ARHGEF12	27.0889	26.8967	27.8432	25.2506	24.9815	25.2646	23.6843	24.0522	23.6348	23.9163	23.0603	23.5361	24.3856	23.2124	23.6788
ARHGEF15	0	0	0	0	0	0	0	0	0	0	0	0	0	0	0
ARHGEF16	0.215553	0.266163	0.291219	0.23222	0.24479	0.116512	0.0943751	0.0846125	0.108133	0.188889	0.125258	0.248681	0.11888	0.0914594	0.0419458
ARHGEF17	2.04537	1.96268	2.23949	1.65265	1.81472	1.56215	1.33001	1.34274	1.33399	1.59134	1.53962	1.59118	1.46817	1.55022	1.41638
ARHGEF18	9.27571	9.43728	9.50074	9.35923	9.46655	9.39834	8.84549	8.88143	8.94729	9.15338	9.41218	8.63488	10.6012	10.2174	10.0987
ARHGEF19	6.41297	6.19691	5.97673	5.09712	5.39057	5.48017	3.20142	3.58456	3.40989	4.28063	5.11125	4.80898	3.69214	3.63339	3.74125
ARHGEF2	20.4221	19.8593	20.6959	20.0874	18.9807	19.8078	21.4955	21.8724	22.0806	20.473	20.1769	20.1524	19.9489	21.9641	20.6634
ARHGEF25	8.45702	9.54401	9.10007	9.96188	11.0134	10.4124	8.85335	9.67812	10.2519	9.46539	9.7035	9.12843	8.10092	8.38305	8.63732
ARHGEF26	8.56285	8.27005	7.87882	8.19692	7.97739	8.37321	6.99647	6.72294	6.73832	8.63907	8.52627	8.5135	5.93685	6.02554	6.47406
ARHGEF26-AS1	0.145926	0.0409505	0.0156462	0.0770769	0.113008	0.131476	0.0710005	0.0954747	0.104587	0.182666	0.169581	0.115521	0.083831	0.0294823	0.0315496
ARHGEF28	3.91175	4.16861	4.49841	3.57228	3.72625	3.50942	3.62307	3.62734	3.35996	3.19205	3.33553	3.19148	3.91351	3.74157	3.70285
ARHGEF3	3.38543	3.10426	3.24444	3.2382	3.97095	4.18272	3.05204	3.1095	3.64107	3.92327	4.18113	3.77045	3.36914	3.8193	3.628
ARHGEF33	0.0283569	0.0875459	0.0182457	0.0808289	0.0658424	0.0681027	0.041368	0.0463726	0.0203175	0.0266293	0.0576876	0.0577538	0.0391014	0.00859563	0.0275963
ARHGEF35	0.1511	0.165584	0.196947	0.130098	0.177731	0.299037	0.168525	0.156793	0.297884	0.187326	0.103891	0.0864809	0.0795848	0.166673	0.135888
ARHGEF37	1.73729	1.88975	1.8622	2.25856	2.32229	2.33554	1.38228	1.5514	1.37571	1.43636	1.63072	1.473	1.96935	1.61769	1.9011
ARHGEF38	0.00737537	0.00621021	0	0	0.00570731	0	0.00860607	0.0144724	0	0	0	0	0.00254257	0	0.00717813
ARHGEF38-IT1	0	0	0	0	0	0	0	0	0	0	0	0	0	0	0
ARHGEF39	2.99554	2.79727	2.8805	2.71199	2.597	2.6588	2.58655	2.46903	2.85668	2.63387	2.52604	2.66194	2.37688	2.39704	2.62881
ARHGEF3-AS1	0	0	0	0	0	0	0	0	0	0	0	0	0	0	0
ARHGEF4	0.764778	0.798927	0.732396	1.18545	1.03393	1.20782	0.28208	0.333028	0.486093	0.697355	0.627541	0.712517	0.701937	0.675483	0.743214
ARHGEF40	45.089	46.3201	46.3532	34.3187	35.6428	34.1859	31.885	32.648	32.2961	35.0778	36.4485	34.7701	30.9096	32.6626	31.7774
ARHGEF5	0.244171	0.255132	0.32618	0.266942	0.343223	0.37171	0.229884	0.273306	0.36474	0.244173	0.186771	0.275188	0.183218	0.197589	0.225929
ARHGEF6	2.83747	2.89472	2.91585	4.80981	4.70524	4.83486	3.89056	3.62438	3.54244	4.13005	4.24797	4.36729	3.43285	3.36642	3.51335
ARHGEF7	17.3879	16.3622	17.0666	17.1554	17.247	17.62	16.8173	16.6155	16.2998	17.2083	16.7862	16.7086	16.8194	16.5912	16.484
ARHGEF9	19.3222	19.2425	19.9075	21.7079	21.3549	21.9341	16.0432	17.0109	16.964	19.0523	19.5083	19.7905	17.1909	17.2237	16.7132
ARID1A	12.8279	13.3534	13.4319	13.778	13.913	13.7214	13.0989	13.1205	12.7741	12.9169	13.2446	13.0279	14.48	14.6836	14.3293
ARID1B	5.40328	5.1429	5.25046	4.99225	5.00087	5.15597	5.36911	5.08152	4.81036	5.06467	5.03188	4.96929	4.8895	5.41739	5.43116
ARID2	2.48327	2.50271	2.55981	2.64762	2.82741	2.73781	2.84916	2.95653	2.92505	2.58325	2.72534	2.74926	2.64297	2.65488	2.61778
ARID3A	1.60071	1.77177	1.81629	1.61369	1.96588	1.99209	1.77662	1.717	1.37661	1.64966	2.02471	2.00833	2.01711	1.91703	1.73853
ARID3B	0.59521	0.533874	0.481805	0.392228	0.453251	0.380427	0.37814	0.329687	0.423027	0.378639	0.478016	0.488804	0.514613	0.449597	0.51571
ARID3C	0.0376938	0	0.0727082	0.0359099	0.0584896	0.0680102	0	0	0.0405624	0	0.131275	0.0383039	0	0.034245	0.109923
ARID4A	2.66884	2.68065	3.04818	2.58361	2.84781	2.9389	2.77773	2.97312	3.04889	3.02219	2.92169	3.14574	2.66909	2.51972	2.43727
ARID4B	6.81469	6.73751	6.55756	6.38184	6.42908	5.99212	6.67181	6.61172	6.33924	6.38681	5.86156	6.15371	5.71483	6.11297	5.76641
ARID5A	3.33738	3.70535	3.44491	3.08169	3.59229	3.53204	3.56954	3.31373	4.00567	3.84319	4.29485	3.65273	3.28366	3.38667	3.32206
ARID5B	5.77565	5.52721	5.92636	6.42507	6.06527	6.60235	4.96148	4.75563	5.00362	5.23782	5.07009	4.94334	4.66447	4.91348	4.9906
ARIH1	15.3587	14.8172	15.2635	15.1032	14.4287	14.8519	13.737	14.3259	13.9812	14.5969	13.8854	13.6177	14.221	13.8977	14.0677
ARIH2	36.9709	35.8186	35.2037	33.3297	33.2281	34.0359	33.3592	33.2699	32.9807	35.137	34.2102	34.2684	31.7823	32.4943	32.2053
ARIH2OS	0.446756	0.493533	0.138049	0.21261	0.259744	0.276925	0.611944	0.466021	0.360408	0.356351	0.29187	0.255554	0.173204	0.380637	0.434449
ARL1	29.9863	30.2109	30.0343	29.6286	28.9693	28.3482	28.1217	28.1171	27.9919	28.519	26.5032	28.1638	26.059	25.6112	25.1728
ARL10	6.36867	6.90604	7.30299	8.23654	8.41007	8.50443	8.05451	8.29359	8.38351	8.12348	7.62088	8.77063	8.15421	8.38809	7.80052
ARL11	0	0	0	0	0	0	0	0	0	0	0	0	0	0	0
ARL13A	0	0.0354862	0.0281767	0.0401943	0	0	0	0	0	0	0	0.0297005	0	0	0.0284028
ARL13B	10.2439	9.96103	10.2862	12.7141	11.1547	12.5294	11.9325	11.9619	12.6861	11.608	11.5701	11.3865	11.556	11.6969	11.785
ARL14	0	0	0	0	0	0	0	0	0	0	0	0	0	0	0
ARL14EP	12.3939	12.4823	12.2927	11.4857	10.5676	10.8589	11.1833	11.0207	11.7533	11.9815	11.5334	12.0508	9.52707	10.0231	10.8944
ARL14EPL	0.0300559	0	0	0	0	0	0	0	0	0	0	0	0	0.027258	0
ARL15	2.29676	2.14839	1.87152	1.9735	1.79196	2.14607	2.55177	2.57134	2.579	1.96453	2.38723	2.11245	2.11106	1.71685	1.78757
ARL16	23.7725	22.962	24.1276	27.3971	26.7781	25.9726	24.5374	25.7416	27.1462	25.425	24.2534	25.2027	23.3593	24.436	21.601
ARL17A	7.61421	7.65578	7.72707	7.47497	7.29666	8.06882	7.34426	7.1414	6.35022	6.36568	6.23142	5.76722	6.15907	6.48382	5.88342
ARL17A	8.54107	8.91167	8.61309	8.48456	8.12866	8.53756	8.0355	8.33728	8.048	7.191	7.01363	6.76639	7.19746	7.35908	7.03143
ARL17A	0	0	0	0	0	0	0	0	0	0	0	0	0	0	0
ARL17A	0	0	0	0	0	0	0	0	0	0	0	0	0	0	0
ARL17A	0	0	0	0	0	0	0	0	0	0	0	0	0	0	0
ARL17B	3.95117	4.35336	4.96776	4.44987	3.19166	4.41507	2.99025	5.69972	5.94898	4.56131	3.87562	5.04669	4.4793	3.2283	6.21056
ARL17B	0	0	0	0	0	0	0	0	0	0	0	0	0	0	0
ARL2	77.1407	81.6838	80.6753	82.433	84.7999	84.4525	79.6876	74.5083	73.3052	82.785	85.4533	83.5742	86.856	85.4335	82.8097
ARL2BP	40.7922	39.5949	40.0943	32.8926	33.8855	34.703	35.9311	35.2046	34.288	39.1273	37.0372	37.2625	35.2598	35.8425	36.0223
ARL2-SNX15	2.15501e-05	0.167321	2.06296e-05	2.22593e-05	0.0322382	1.78299e-05	2.44408e-05	1.7066e-05	1.70168e-05	1.67964e-05	0.202603	2.09277e-05	2.08974e-05	2.08753e-05	1.97051e-05
ARL3	10.8266	10.4141	10.155	10.4953	10.2035	9.78927	9.80105	9.64913	9.55886	11.0791	10.2154	10.8737	9.39407	9.57609	9.71344
ARL4A	41.4995	41.2788	42.4225	35.3183	32.6529	34.5864	36.8305	36.1222	35.6467	39.2765	35.2662	38.1397	32.7362	33.2578	33.3675
ARL4C	7.62182	7.40972	7.34617	17.3819	17.8337	16.8158	21.75	21.6815	21.3116	14.1866	13.965	13.9279	30.1027	30.4058	29.7846
ARL4D	8.93523	9.25242	9.9521	9.44373	8.24217	9.12361	9.18913	8.55096	8.76218	7.56478	7.48855	7.93977	10.3741	11.2711	9.53871
ARL5A	15.9266	15.0885	15.1713	15.6587	14.0253	15.9345	14.6064	14.9947	15.0126	16.094	14.8327	14.9318	14.7541	13.8208	14.4394
ARL5B	6.74658	6.77972	7.11908	6.4767	6.53485	6.85055	6.56809	6.79994	6.3281	6.35656	6.86009	6.58936	6.6097	6.38468	6.86602
ARL5C	0	0	0	0	0	0	0	0	0	0.0498054	0	0.0539243	0	0	0.051611
ARL6	5.00905	5.03603	4.98256	4.98969	4.72912	4.79062	4.49995	3.89162	4.87328	4.97196	4.14553	5.0455	4.6139	4.50727	4.42625
ARL6IP1	163.462	159.523	164.445	155.679	147.026	155.799	186.77	189.08	188.589	171.585	167.33	171.775	178.602	174.962	173.788
ARL6IP4	87.3917	87.6065	87.5471	77.7871	78.8937	76.5307	88.9992	86.0878	90.171	85.8038	92.2278	88.9737	88.1537	91.2669	88.5971
ARL6IP5	96.0166	97.437	99.2839	86.5149	80.9764	84.3862	78.0631	77.2213	79.2163	86.7974	83.0948	85.0325	76.8828	79.1735	76.8851
ARL6IP6	17.3633	16.5042	16.5921	19.0147	18.3477	18.3209	18.2347	17.9189	18.3135	20.5827	18.8477	19.2612	16.413	16.1941	15.6681
ARL8A	15.8403	16.5702	17.1983	15.7256	15.6025	14.8957	13.4303	14.9209	15.0002	14.8126	15.3977	14.8196	14.022	14.3801	14.4741
ARL8B	32.4483	31.3823	30.0213	34.1054	31.6063	32.3729	32.7329	32.8122	33.2009	32.9442	32.8881	31.9813	32.3236	32.9403	32.2916
ARL9	0.248331	0.365531	0.359039	0.474253	0.28961	0.33654	0.204671	0.488131	0.200642	0.290907	0.701864	0.44081	0.38488	0.338139	0.36174
ARMC1	27.4659	25.6865	26.7915	24.6897	23.0432	24.4698	26.3831	27.4581	27.0606	25.0422	24.3835	23.8835	25.1441	23.9317	24.5642
ARMC10	20.2334	19.8333	20.3361	0	0	22.4354	0	23.2423	23.4347	23.7859	0	23.2898	23.0494	21.5574	22.7504
ARMC12	0.323634	0.476576	0.390138	0.770996	0.690667	0.912538	0.443759	0.397322	0.740151	0.872708	0.493044	0.893937	0.334516	0.293996	0.471841
ARMC2	0.338361	0.406972	0.384856	0.413446	0.402266	0.359204	0.304167	0.41503	0.454616	0.419836	0.316035	0.467532	0.337412	0.428537	0.246937
ARMC3	0	0	0	0	0	0	0	0	0	0	0	0	0	0	0
ARMC4	0.0230246	0.0290783	0.0148139	0	0	0.0207387	0	0.0225929	0.0371215	0.02162	0.0100361	0.0234431	0	0.0104682	0.0336076
ARMC5	3.0628	3.66339	3.31632	3.49458	4.2245	4.20237	3.75827	3.82893	3.1856	3.60697	3.54542	3.2659	3.78256	3.88296	3.92894
ARMC6	24.4925	24.8829	24.1831	20.4204	21.9548	20.4382	22.6374	22.2582	22.2316	24.4872	24.1585	23.3907	23.8545	27.0422	24.4618
ARMC7	5.74103	6.39841	5.78323	6.13323	5.669	5.39238	5.91067	5.95242	6.17309	5.92031	7.08137	5.77988	6.22876	6.35814	6.82345
ARMC8	14.3925	13.7309	13.3686	13.379	13.7961	13.4021	13.7446	14.1612	13.5155	14.0702	13.0559	13.5832	13.1132	13.3664	12.8777
ARMC9	10.6302	11.7252	11.2959	8.9937	9.13308	9.75	10.2726	8.99262	9.67529	10.771	10.7764	10.3022	9.87478	10.046	9.53342
ARMCX1	16.1734	15.7088	16.4702	16.5605	15.4002	16.2996	17.5129	15.9734	15.8962	17.3654	18.1421	17.42	15.4839	15.2882	15.625
ARMCX2	12.0022	11.8718	11.3017	12.4518	13.012	12.554	10.7825	10.7175	10.8158	10.6028	10.8674	10.4405	10.0214	9.35022	10.0267
ARMCX3	23.9491	24.6676	23.9744	25.0859	24.8099	24.5929	20.1985	20.602	19.8907	21.6508	21.0769	22.6377	17.9089	18.0226	17.6772
ARMCX4	3.75497	3.61933	3.65962	3.88812	4.05483	4.10454	3.58618	3.63829	3.94436	3.85274	3.73022	3.84689	3.40036	3.39329	3.60216
ARMCX5	5.8668	5.28101	5.36004	5.15309	4.92583	4.49521	5.36909	5.53398	5.61615	5.68761	5.12772	5.60764	4.87913	4.60293	5.00295
ARMCX5-GPRASP2	1.38167	1.31733	0.85628	1.48695	1.26778	1.47541	1.03129	1.42147	1.41556	1.52738	1.07863	1.23197	1.09251	0.798772	1.30262
ARMCX6	32.4589	34.2494	33.3292	32.3095	33.2842	32.8103	30.4567	31.2925	33.9569	35.1658	34.8533	35.027	31.4469	30.6545	31.3489
ARMS2	0	0	0	0	0	0	0	0	0	0.0609133	0	0.0659227	0	0	0.0631206
ARNT	5.75447	5.71542	5.92617	6.56912	6.0631	6.52573	6.25909	6.13884	6.23374	6.74623	5.88373	6.36559	6.21691	5.66135	5.53532
ARNT2	16.3512	16.3984	16.5473	15.6495	15.9314	16.5559	13.9923	14.1107	14.4698	13.4853	13.9501	14.1562	15.0154	14.8266	15.0594
ARNTL	3.54291	3.32623	3.79207	3.86517	3.23292	4.04991	5.14771	5.02747	4.69367	4.30887	3.86564	3.46624	5.28111	5.24481	5.18523
ARNTL2	3.85483	3.42979	3.60274	3.333	3.04159	3.25045	4.17878	4.11362	4.25797	3.01903	2.76101	2.78594	3.26531	3.47127	3.32629
ARPC1A	108.464	110.274	111.163	103.366	103.607	107.137	103.801	107.5	104.41	107.157	104.378	107.338	103.603	100.986	103.002
ARPC1B	189.734	194.778	194.044	173.243	182.689	173.69	158.523	156.869	150.897	193.17	204.284	193.136	159.012	164.521	165.047
ARPC2	200.623	196.495	199.329	193.851	192.018	194.348	216.511	218.828	215.438	209.878	211.238	212.265	215.779	209.184	213.321
ARPC3	222.694	217.629	215.09	121.724	125.246	126.818	214.408	215.178	209.316	220.266	212.291	227.358	183.278	188.355	195.803
ARPC4	133.455	131.535	128.911	129.174	130.782	132.267	127.481	131.073	132.463	139.881	137.554	139.788	130.219	136.834	136.204
ARPC4-TTLL3	0.981824	1.0688	1.16909	1.26174	1.52947	1.31285	1.10634	1.05772	0.844219	1.30512	0.946484	0.678032	0.761652	0.983322	0.80519
ARPC5	60.7084	59.273	60.6989	84.3773	85.0724	85.4571	75.3744	77.6656	77.69	81.5753	76.7623	77.7018	71.5612	72.8988	70.3498
ARPC5L	29.1494	27.6507	28.7953	29.204	27.7852	27.9894	29.694	30.4604	27.6898	28.7174	28.0614	27.0843	28.2061	27.9876	28.1852
ARPP19	56.1538	53.8827	55.2812	52.968	52.1499	53.2734	56.9917	58.7801	56.8206	53.442	52.7129	55.5936	56.5082	54.3945	55.2908
ARPP21	1.15106	1.06511	1.04255	1.52749	1.34632	1.31942	0.682484	0.583122	0.770566	0.991137	1.04747	0.91524	0.952913	1.01935	0.901297
ARR3	0	0	0	0	0	0	0	0.0346505	0	0	0	0	0	0	0.0343039
ARRB1	6.64884	6.71825	6.85255	2.93077	2.65424	2.6977	2.94955	2.43173	2.66931	3.26503	3.58365	3.47333	3.2684	3.4904	3.28087
ARRB2	19.0918	19.6099	20.2727	21.6231	21.1218	21.8682	18.5138	18.8779	19.6835	21.5856	22.8134	22.1233	20.5399	21.4288	21.9946
ARRDC1	6.98056	7.70852	6.8688	6.272	6.64511	7.27557	5.01794	5.81156	5.10578	5.69462	6.29952	6.92836	6.23534	6.1917	6.54389
ARRDC2	4.96127	5.28572	4.79066	5.46571	5.49647	5.22299	4.99147	4.15803	5.04585	5.31376	5.41815	5.68355	4.35266	4.93756	5.70549
ARRDC3	18.1496	16.8382	18.1911	17.4359	16.3296	17.2434	13.6855	14.3934	13.5902	16.7584	15.6827	16.8162	12.5022	12.4162	12.7965
ARRDC3-AS1	0.0675764	0.142225	0.0652086	0.0803149	0.143923	0.0761089	0.12947	0.0331604	0.0726512	0.0634409	0.014724	0.0343886	0.0873461	0.0460773	0.016436
ARRDC4	13.3347	12.934	12.2402	11.126	10.989	10.8711	7.79476	7.39364	8.07705	6.92523	6.54324	6.72288	8.09359	7.9288	8.1336
ARRDC5	0	0	0	0	0	0	0	0	0	0	0	0	0	0	0
ARSA	7.92538	8.19346	7.97925	7.56771	8.19147	7.45274	5.9742	6.36439	6.14218	6.49018	6.7823	6.5368	5.68913	6.03418	6.09932
ARSB	5.31428	5.5316	5.00077	5.54115	6.17156	5.27221	6.24481	6.24477	6.42308	5.75209	5.67427	5.66669	5.76571	6.13391	5.3542
ARSD	7.21513	7.48813	8.06908	8.61836	7.99443	8.35936	6.65613	6.3144	6.65566	7.27772	7.00116	6.97592	6.60093	6.82279	6.08056
ARSE	7.26405	7.69517	7.52969	9.23542	9.1344	8.72501	7.0048	7.12963	7.18887	8.75421	8.91044	9.09761	5.81756	5.90288	6.27292
ARSF	0	0	0	0	0.00124867	0	0	0	0	0.00163931	0	0	0	0	0
ARSG	0.210692	0.308342	0.10216	0.225907	0.128818	0.139888	0.198691	0.237467	0.227932	0.24138	0.192428	0.323287	0.23458	0.26346	0.369932
ARSH	0	0.0016964	0	0	0	0	0	0	0	0	0	0	0	0	0
ARSI	0.0130907	0	0.0126333	0.0124422	0.02027	0.0117922	0	0.0256919	0	0	0	0.0133271	0	0	0
ARSJ	18.4445	18.657	17.8948	25.6264	24.662	25.8192	24.5578	24.4089	24.5361	23.2662	22.7111	23.696	24.6772	24.1722	24.7362
ARSK	4.75348	4.46992	4.28956	5.21001	4.80786	4.92682	6.32365	6.50606	6.17111	5.18214	5.3923	5.6441	6.15418	5.68066	6.11117
ART1	0	0	0	0	0	0	0	0	0	0	0	0	0	0	0
ART3	0.377482	0.540845	0.394474	0.278042	0.249097	0.210676	0.32008	0.172064	0.407986	0.191858	0.281978	0.475207	0.271747	0.212351	0.31243
ART4	0	0	0	0	0	0	0	0	0	0	0	0	0	0	0
ART5	0	0	0	0	0	0	0	0	0	0	0	0	0	0	0
ARTN	0.237598	0.247909	0.165084	0.341585	0.265309	0.183773	0.148868	0.215965	0.157734	0.229419	0.138176	0.174053	0.257712	0.217358	0.220337
ARV1	13.1839	12.0734	12.6265	13.5986	13.1766	11.5779	11.8706	11.9278	11.1777	12.2863	13.1226	13.2441	11.1306	11.1245	10.8961
ARVCF	1.5223	1.78847	1.58538	1.48974	1.41707	1.67624	1.1621	1.10167	1.098	1.30129	1.43742	1.09179	1.21342	1.23253	1.20089
ARX	0.0290644	0	0.0163612	0	0	0	0	0	0	0.0136441	0.0380008	0.0147931	0.0150275	0	0.0989765
AS3MT	2.60886	2.65871	2.80026	3.45895	2.85086	3.60197	2.85619	2.66124	3.33965	2.45179	3.15216	2.83908	2.80375	2.8087	2.92211
ASAH1	87.3251	86.421	85.9394	76.5228	75.112	76.4494	64.6656	68.8195	66.9705	71.9097	70.4472	71.4952	75.9749	72.2391	74.5173
ASAH2	1.05248	1.06869	1.2552	1.28134	1.04166	1.17075	0.996508	0.902914	1.03911	0.936649	0.93426	1.04474	1.03248	0.938789	0.835653
ASAH2B	3.89691	4.05909	4.69921	4.48437	3.55605	3.86172	3.59375	3.28627	3.63717	3.77679	3.1186	3.92493	3.5612	3.21481	3.09721
ASAP1	43.2524	43.1472	43.7875	40.739	38.7752	39.8514	39.0979	39.4172	39.2649	38.8608	38.5107	39.367	37.2458	36.4535	37.6777
ASAP1-IT1	0	0	0	0	0	0	0	0	0	0	0	0	0	0	0
ASAP2	25.3117	24.8675	23.9079	25.4253	25.6112	25.4164	25.4635	25.9471	25.3929	29.6523	28.7111	29.0137	25.8275	25.9888	26.2059
ASAP3	7.19869	6.94246	7.19547	8.86783	8.28124	8.3248	8.65498	8.37184	8.85121	7.92838	8.36962	8.3226	9.31347	9.35679	9.46794
ASB1	10.0819	9.69942	9.7824	10.8201	11.161	11.0879	10.6251	10.2465	10.3943	10.4126	10.5061	10.4878	10.547	11.2704	11.0263
ASB10	0	0	0	0	0	0	0	0	0	0	0	0	0	0	0
ASB11	0.150761	0.190387	0.232777	0.0429247	0.0933932	0.041418	0.0165029	0.0150324	0.0164675	0.0566181	0.0267108	0.0306387	0.0623594	0.082243	0.0745537
ASB12	0	0	0	0	0	0	0	0	0	0	0	0	0	0	0
ASB13	7.55987	7.85145	7.49473	6.61648	6.85773	6.71998	6.89966	6.92022	7.02654	7.99951	8.62959	7.84497	7.46524	7.51872	7.92403
ASB14	0.272605	0.196701	0.319243	0.351724	0.392108	0.368488	0.341156	0.286673	0.146555	0.347288	0.220589	0.277395	0.201337	0.247654	0.170476
ASB15	0	0	0	0	0	0	0	0	0	0	0	0	0	0	0
ASB16	1.26494	1.03104	0.910549	1.01975	1.19768	1.054	0.791556	0.926247	1.25218	0.697352	0.822338	0.776353	0.622825	0.730087	0.646167
ASB16-AS1	6.69145	6.45975	6.48264	5.86667	5.80319	6.2362	4.81587	5.77011	4.97741	4.39952	5.92922	5.17418	4.40173	4.21367	4.61776
ASB17	0	0	0	0	0	0	0	0	0	0	0	0	0	0	0
ASB18	0	0	0	0	0	0	0	0	0	0	0	0	0	0	0
ASB2	0.888453	0.836726	0.799237	0.271989	0.303172	0.284895	0.148352	0.118223	0.242821	0.127242	0.19688	0.137954	0.140145	0.105618	0.190467
ASB3	6.24197	3.67882	4.96563	3.98008	5.17717	4.94382	3.9051	3.61216	5.72461	4.42147	4.57696	4.40285	3.85853	3.9845	5.05594
ASB4	0	0	0	0	0.00249714	0	0.011718	0	0	0.0100559	0	0	0	0	0
ASB5	0	0	0	0.0130528	0	0	0	0	0	0	0	0.0139796	0	0	0
ASB6	7.56409	7.23244	7.8895	7.54941	8.35572	7.88874	8.2942	8.32141	8.43604	7.86736	8.27	8.23424	8.9194	9.24399	8.73365
ASB7	6.66016	6.25623	6.40283	5.9127	6.38935	6.10527	6.42588	6.90163	6.54144	5.87545	6.09319	6.36467	6.40242	7.16075	6.77661
ASB8	5.99392	6.60609	6.73247	6.09692	4.66673	5.34227	6.26185	6.11961	5.49111	6.08109	5.63143	5.47759	5.8315	5.71314	4.90667
ASB9	26.4999	26.549	27.0223	18.0003	18.1385	19.9178	16.7673	18.2459	17.5767	19.947	19.2322	20.0846	18.3995	18.1486	17.0996
ASB9P1	0.0821647	0.0691571	0	0	0.0424608	0.0246927	0.0900322	0.0537766	0	0.0257017	0.0298224	0.0626693	0.113262	0.049782	0.115416
ASCC1	10.3657	9.92828	9.80886	9.70084	8.80315	9.8266	9.5529	9.82789	8.85756	9.88447	9.72949	10.3682	9.03981	8.78647	9.27027
ASCC2	11.6922	11.9585	11.8679	11.1947	11.8853	11.8452	11.5623	10.8882	12.1834	12.1891	12.6791	11.9565	12.1748	12.6836	13.1821
ASCC3	6.30437	6.35202	6.29304	7.07583	6.86609	7.26956	6.92933	7.33733	7.03807	7.56577	7.12888	7.37792	7.06182	6.9542	7.11891
ASCL1	0	0	0	0	0	0	0.0186425	0.0334234	0.0366137	0	0	0	0	0	0
ASCL2	0	0	0	0	0	0	0	0	0	0	0	0	0	0	0
ASCL3	0	0	0	0	0.0689773	0	0	0	0	0.0828692	0	0	0	0	0
ASCL4	0	0	0	0	0	0	0	0	0	0	0	0	0	0	0
ASCL5	0.0640811	0.107863	0	0.0305079	0	0.115581	0.0351221	0.0943809	0.0344701	0.0601241	0.0279043	0	0	0	0.0311528
ASF1A	9.97515	10.412	10.1785	9.21202	8.49532	9.16989	9.72168	9.78981	9.65544	10.298	9.4134	9.99809	8.24134	8.41011	8.18013
ASF1B	28.7874	31.2	30.3104	31.7953	34.8491	32.9787	29.5851	30.2859	30.2488	30.5073	31.826	32.545	30.7376	32.2769	30.5615
ASGR1	0.0329665	0.0554911	0.127203	0.371015	0.332717	0.286265	0.289141	0.235472	0.290328	0.168782	0.0861327	0.234601	0.154964	0.239658	0.0583012
ASGR2	0	0	0	0	0	0	0	0	0	0	0	0	0	0	0
ASH1L	4.80772	4.66515	4.83004	5.22325	5.0664	5.06332	5.10981	5.20479	4.8704	4.92618	4.84612	4.81157	4.72727	4.77324	4.5779
ASH1L-AS1	0.596303	0.539136	0.639262	0.48321	0.507655	0.587208	0.653114	0.606999	0.451238	0.49751	0.500331	0.561725	0.502373	0.501879	0.601495
ASH2L	28.1744	27.2252	29.0339	28.1336	28.5775	29.5874	29.5179	29.1039	29.1801	30.0898	28.8709	30.7152	30.2572	30.5546	29.78
ASIC1	2.05926	2.06172	2.1285	2.58218	2.43705	2.48571	2.73707	2.46367	2.62176	3.16482	3.13867	3.20477	2.36796	2.69014	2.52008
ASIC2	0.00780589	0.0131433	0	0.00742097	0.0312311	0.00703266	0.00284833	0.00574542	0.0104895	0.0146571	0.0117929	0	0.0080718	0	0
ASIC3	2.08986	2.16689	2.23115	2.02785	2.23392	2.45045	2.28717	1.93283	2.40358	1.60485	1.79126	1.92067	2.03119	1.75362	1.72427
ASIC4	0.0293958	0.0123742	0.0283674	0	0.0455236	0.0397238	0.0160883	0.0288477	0.0316003	0.0413989	0.0128113	0.0149616	0.0303977	0.0534538	0.0143006
ASIC5	0.156884	0.0880341	0.176578	0.0248828	0.182397	0.0235723	0	0.102676	0.0843681	0.0245384	0	0.0531872	0.135166	0.0712928	0.0762869
ASIP	0.104268	0.262888	0.200792	0.0999634	0.162728	0	0	0.205229	0.225082	0.195114	0.0904914	0	0.215313	0	0.505436
ASL	10.6812	11.6202	9.50743	8.8814	9.83122	9.56887	7.8125	8.98088	8.8776	8.18702	8.95754	9.31266	9.39847	9.00187	9.66271
ASMT	2.7228e-283	8.27468e-256	0.045589	0	0.00223676	0	0	1.05173e-311	0	0.0886692	1.585e-257	1.73901e-270	6.44708e-271	0	0
ASMT	0	0	0	0	0	0	0	0	0	0	0	0	0	0	0
ASMTL	13.0812	13.4119	12.1185	13.5021	14.6843	13.1892	10.521	11.13	10.6645	14.1511	14.3393	12.6063	12.6516	13.1182	12.4422
ASMTL	0	0	0	0	0	0	0	0	0	0	0	0	0	0	0
ASMTL-AS1	3.12032	2.76073	3.00364	3.45015	3.73105	3.11311	2.9809	2.47969	3.12358	2.11829	2.59233	2.52647	1.84629	2.4422	1.80259
ASMTL-AS1	0	0	0	0	0	0	0	0	0	0	0	0	0	0	0
ASNA1	65.6762	67.8269	66.0711	61.144	61.0991	59.2986	61.0747	58.1954	59.808	66.1329	66.5067	61.6632	64.7049	64.5768	61.1386
ASNS	14.0726	13.9712	13.4959	11.8551	11.4064	11.4446	11.7676	12.243	11.834	12.3203	12.2024	12.1401	10.8489	10.417	10.7602
ASNSD1	23.8395	23.1548	22.8718	21.0876	21.8853	23.0848	22.3687	22.8421	24.2307	22.8948	21.1053	22.601	21.1563	20.7546	21.8141
ASPA	7.43409	8.2652	7.16387	6.72292	6.04754	6.97198	1.82939	2.14286	2.1062	5.48037	5.43642	5.64445	2.97743	2.74131	2.87081
ASPDH	0	0	0	0	0	0	0	0	0	0	0	0	0	0	0
ASPG	0	0	0	0	0	0	0	0	0	0	0	0	0	0	0
ASPH	63.3502	62.1061	63.0672	70.2875	69.2566	70.3332	81.2911	80.6476	80.2028	84.69	82.881	83.6355	84.6958	82.6826	83.3972
ASPHD1	24.9798	27.2737	26.0889	21.8453	21.5472	21.4753	15.4134	15.5051	15.4242	17.584	17.5203	17.7171	17.667	20.2205	18.1923
ASPHD2	2.19545	1.93245	2.52807	2.26441	2.53017	2.55066	2.53922	2.41142	2.61461	2.62366	2.34881	2.7432	2.63156	2.49534	2.51258
ASPM	10.3846	9.68855	10.3381	10.3366	10.1517	9.73747	13.185	13.6231	13.6774	10.6955	10.1421	10.6668	12.4864	11.9489	12.1173
ASPN	0.468796	0.535313	0.516709	0.715942	0.673877	0.738759	0.329894	0.706162	0.737583	0.924269	0.74378	0.749357	0.566603	0.56289	0.700024
ASPRV1	0	0.0664026	0.0380555	0.187549	0.12221	0.0888551	0.0431891	0.096777	0.0424073	0.092556	0.103107	0.0802648	0.0611712	0.179266	0.0383663
ASPSCR1	19.1394	21.4127	21.6814	17.8258	19.2338	17.3947	16.8182	15.361	16.1584	17.8803	18.2672	17.1294	17.8192	18.9825	18.514
ASRGL1	1.78135	1.6388	1.56159	1.57973	1.28954	1.59846	1.32345	1.5551	1.57372	1.46093	1.27632	1.08633	1.44957	1.43085	1.3972
ASS1	0.172087	0.186239	0.213468	0.233922	0.133364	0.199452	0.0538583	0.0241279	0.0793203	0.0461407	0.128507	0.125036	0.177928	0.0893807	0.119547
ASTE1	3.7423	3.4962	3.44366	3.45274	3.24039	3.32895	3.37069	3.33172	3.44598	3.52825	3.92236	3.90554	3.37992	3.20141	3.54881
ASTL	0	0	0	0	0	0	0	0	0	0.0334998	0	0	0	0	0
ASTN1	0.875357	0.869443	0.747858	1.09145	1.06611	1.14041	1.03776	1.10641	1.0418	1.40398	1.26455	1.25453	1.04512	1.19702	1.1442
ASTN2	1.51914	1.69923	1.80312	1.41945	1.39038	1.88009	1.64724	1.34065	2.22321	1.81111	1.77076	1.78086	1.42101	1.5262	1.54489
ASUN	9.09721	8.30711	9.15727	8.53643	8.65836	8.22048	9.2832	9.79264	9.43308	10.4994	9.52789	9.27511	8.66925	8.90771	9.11029
ASXL1	24.0014	24.6979	25.0473	24.5954	25.2101	25.2968	25.6496	26.9672	26.5012	24.3655	23.7083	24.9418	24.3985	24.727	24.4437
ASXL2	7.78265	7.55907	7.83917	7.88254	7.80091	7.80276	8.51649	8.20756	7.67788	7.85393	7.32969	7.69567	7.96585	8.17006	8.33743
ASXL3	0	0	0	0	0	0	0	0	0	0	0	0	0	0	0
ASZ1	0	0	0	0	0	0	0	0	0	0	0	0	0	0	0
ATAD1	0	0	0	0	0	0	0	0	0	0	0	0	0	0	0
ATAD2	26.3334	24.534	25.5913	34.2008	32.048	33.3113	30.7136	30.5136	29.8286	29.7682	28.8796	30.2838	29.3812	27.4449	28.3313
ATAD2B	1.99705	1.86999	1.88178	1.64504	1.67989	1.61708	1.80668	1.9996	1.9456	1.79831	1.79378	1.77474	1.83932	1.59281	1.65105
ATAD3A	29.5008	26.6428	29.0453	27.7605	28.5647	28.4012	27.5392	30.0063	31.0054	28.7508	32.2699	31.0455	35.1057	33.1287	33.2075
ATAD3B	12.3692	13.7821	12.9987	13.0458	13.5897	13.4065	14.6449	13.936	15.039	12.1262	12.8623	12.567	12.4703	14.5311	12.5745
ATAD3C	0.580391	0.529098	0.6505	0.779387	0.797561	0.71262	0.823986	0.740626	0.8103	0.843893	0.789031	0.736171	0.700873	0.806755	0.823791
ATAD5	3.37367	2.99197	3.36156	4.13055	4.15388	4.21019	4.19542	4.31042	3.86655	3.77088	3.55142	3.59964	3.42281	3.44737	3.55824
ATAT1	9.97096	10.3116	10.1433	9.83142	10.3856	10.2593	10.2522	10.0613	9.98279	9.74361	9.88928	9.42864	8.02179	9.58414	8.06029
ATAT1	0	0	0	0	0	0	0	0	0	0	0	0	0	0	0
ATAT1	0	0	0	0	0	0	0	0	0	0	0	0	0	0	0
ATAT1	0	0	0	0	0	0	0	0	0	0	0	0	0	0	0
ATAT1	0	0	0	0	0	0	0	0	0	0	0	0	0	0	0
ATAT1	0	0	0	0	0	0	0	0	0	0	0	0	0	0	0
ATAT1	0	0	0	0	0	0	0	0	0	0	0	0	0	0	0
ATCAY	0.00801766	0.00675095	0	0.0152337	0.0310234	0.0288806	0.0263138	0.047199	0.00287211	0	0.0155564	0.00816556	0.0912106	0.00729136	0.00780304
ATE1	5.50422	5.52897	5.21569	4.91959	5.08767	5.27408	5.38868	5.15961	4.91623	5.16506	5.4196	5.34676	4.96817	4.77432	4.95676
ATF1	5.47496	5.66735	5.56804	9.07972	8.28432	8.40661	8.51531	8.74289	7.98116	9.3928	8.88164	9.19035	8.04277	8.06832	7.86254
ATF2	15.1935	15.9824	14.6015	15.5245	15.2604	14.9158	14.6616	15.2144	15.2232	15.5039	14.882	15.4161	15.2345	14.8331	14.7806
ATF3	1.89823	1.35084	1.43711	0.964153	1.21112	0.823568	0.62073	0.714287	0.97326	0.913146	0.981544	0.897257	0.816049	0.820802	0.699029
ATF4	91.9306	87.6071	89.7761	85.7535	89.2643	88.7447	91.56	86.2057	89.8652	93.3351	93.4434	94.7305	81.3375	81.987	80.9556
ATF5	24.1065	23.8208	23.3657	15.3399	15.2198	14.3031	15.8453	14.074	16.0172	14.3338	14.6368	14.183	18.3212	19.7281	18.7936
ATF6	8.38359	8.44336	8.01925	7.49915	7.44953	7.53974	6.89805	7.00132	6.73251	7.79608	7.21347	7.11472	6.52372	6.73758	6.80419
ATF6B	50.8366	52.6132	51.73	51.9418	51.9433	49.8989	42.235	39.2112	41.2711	50.2875	49.2874	48.3404	39.9498	41.2874	42.7669
ATF6B	0	0	0	0	0	0	0	0	0	0	0	0	0	0	0
ATF6B	0	0	0	0	0	0	0	0	0	0	0	0	0	0	0
ATF6B	0	0	0	0	0	0	0	0	0	0	0	0	0	0	0
ATF7	7.0569	7.48321	7.77179	7.58447	7.10248	7.03037	6.2707	7.25467	8.12096	6.99095	6.78675	7.29627	6.3418	6.34096	6.72856
ATF7IP	7.95033	7.75191	7.56846	8.28984	8.39005	8.52601	9.04527	9.7369	9.11416	8.03358	8.1863	7.9682	8.69416	8.93368	8.55657
ATF7IP2	0	0	0	0	0.000662664	0	0	0	0.0128956	0	0	0	0	0.000928151	0.00389365
ATG10	3.14829	3.26031	2.94075	3.62236	2.70687	3.75501	3.04701	3.42317	3.22854	2.55077	3.62785	3.33677	2.93425	3.41002	3.25985
ATG12	7.08018	6.54221	7.12735	7.81573	7.37269	7.92187	7.88055	7.51193	7.60015	7.25327	7.4808	7.70747	6.65007	6.92124	6.99499
ATG13	13.0936	13.2391	13.3076	14.2481	14.9116	14.3384	13.0896	12.4973	13.1379	14.9403	14.594	15.3476	13.4467	13.316	13.1585
ATG14	2.91087	2.54439	2.59614	2.44919	2.34524	2.12941	2.41881	2.41423	2.68794	2.50114	2.46626	2.46023	2.13641	2.22276	2.47566
ATG16L1	12.8487	11.6775	11.669	12.7813	12.8669	13.458	14.956	15.1638	14.2713	12.7791	14.1092	13.9509	14.9485	14.5907	14.5096
ATG16L2	4.06326	4.06079	4.11372	4.39754	4.29514	3.69781	3.74819	3.55595	3.31443	2.89349	3.40124	3.44202	3.27003	2.94767	3.17375
ATG2A	5.34209	5.72279	5.51377	5.17556	5.51295	4.95152	4.95416	4.67448	4.74217	4.76372	4.4571	4.64848	5.55092	5.72051	5.37358
ATG2B	3.21468	3.0899	3.22137	2.69513	2.67366	2.69587	3.02997	2.84001	2.93019	3.13629	3.21557	3.00366	2.77747	2.8189	2.75576
ATG3	61.0002	56.7399	59.1208	51.917	53.1865	54.0118	57.416	59.9782	57.9561	58.3831	53.5024	59.588	53.7289	52.9593	53.7056
ATG4A	8.79802	8.49114	8.81993	6.38856	6.85743	7.33077	6.75136	6.32127	5.64	6.9114	5.83871	6.72437	6.04963	6.15764	6.23119
ATG4B	17.0761	17.0909	17.0282	17.2167	17.8538	17.5812	18.3201	16.7888	17.7314	16.9488	19.076	17.504	17.2743	18.0456	16.4922
ATG4C	9.55308	8.62586	9.46718	11.4376	11.1142	11.4739	8.3682	8.97866	8.84694	9.49773	9.76173	9.9353	7.80423	7.33869	7.44183
ATG4D	9.21407	8.35565	8.49083	9.94625	10.9499	11.6188	8.40635	9.04462	9.38982	8.97165	9.24934	9.4904	10.9284	11.4454	11.1634
ATG5	11.1804	12.0949	11.3028	11.8832	11.991	11.9176	11.3518	11.1048	11.5744	12.2668	11.0103	11.8848	10.8219	9.77347	9.98106
ATG7	4.85278	4.44864	4.73407	4.35344	4.5978	4.29706	4.59064	4.35237	4.61564	4.39698	4.52182	4.68065	4.54693	4.58188	4.48164
ATG9A	29.5922	29.49	28.2132	28.1102	29.1942	29.1135	26.8017	26.4729	26.5734	28.6738	28.9026	29.6377	30.1451	30.9367	30.3542
ATG9B	0.0959803	0.0448955	0.0537565	0.0469577	0.0824887	0.0288154	0.128364	0.0947643	0.119157	0.0943774	0.12925	0.130309	0.0661721	0.0776694	0.0518892
ATHL1	4.56951	4.68913	4.61753	4.88434	5.44684	5.24493	4.54379	4.22317	4.04095	4.56393	4.47989	4.5813	3.73058	3.92472	3.71967
ATIC	48.0341	48.1689	47.068	45.3793	44.1622	46.7351	51.2687	51.509	49.2498	50.3844	49.1024	52.1755	48.838	48.5539	47.7097
ATL1	15.6289	15.4067	15.4703	17.3562	17.4632	17.3526	15.5154	15.7781	15.9916	15.1702	15.3253	16.3824	15.8024	16.0119	16.1717
ATL2	21.5296	20.177	21.3045	18.644	17.64	18.6654	20.3692	19.9839	21.4627	19.5769	19.4784	20.7184	20.4119	19.7046	18.4799
ATL3	19.3638	21.0177	19.8387	21.6909	20.8787	22.3275	18.5087	19.1539	18.9272	17.9109	17.8123	17.4455	18.4174	19.3355	19.1134
ATM	6.76264	6.61872	6.6232	7.37443	7.3173	7.34504	6.15761	6.32614	6.28945	5.97029	5.66891	6.18535	5.63654	5.34886	5.62074
ATMIN	8.5433	8.3271	8.28949	7.35255	7.24727	7.34189	8.12368	8.00417	8.3734	7.51975	7.59389	7.75881	8.28537	8.10184	8.4547
ATN1	35.9382	37.5671	36.7272	37.146	39.5355	36.4	37.3741	35.3408	37.2372	34.7643	36.9098	35.0085	34.701	37.1289	37.4068
ATOH1	0	0	0	0	0	0	0	0	0	0	0	0	0	0	0
ATOH7	0	0.0498451	0	0.0281885	0.0229581	0	0	0.0581459	0	0	0.0257918	0	0.0306128	0.0269095	0.0575876
ATOH8	0.0547526	0.0518662	0.0528475	0.201537	0.270092	0.197212	0.0524066	0.0604331	0.110321	0.115699	0.035807	0.0627384	0.0778611	0.118262	0.139885
ATOX1	87.4606	92.7599	87.9159	64.856	69.2326	67.0545	88.6786	96.616	93.8871	76.4809	75.6549	76.615	98.8398	96.9577	88.3373
ATP10A	0.300358	0.201028	0.1561	0.197539	0.119197	0.145641	0.513935	0.544047	0.355886	0.224215	0.188025	0.203937	0.127439	0.175097	0.157404
ATP10B	2.70834	2.74111	2.56344	3.95581	3.92637	3.84011	3.06577	3.00272	2.76893	3.84772	3.68253	3.81018	2.85005	2.7789	2.71803
ATP10D	5.78782	5.64175	5.43046	5.15359	4.94339	5.1758	4.89247	5.01085	4.41952	4.85993	5.21993	5.17754	4.56284	4.69501	4.92359
ATP11A	4.64975	4.69445	4.73939	5.14684	4.81202	4.93707	4.33472	4.26023	4.29471	4.16181	4.28181	3.96686	4.23676	4.0057	4.4246
ATP11B	17.9061	17.1969	17.5148	18.3194	17.7733	17.4747	18.6567	18.9176	18.3932	17.6712	17.7237	18.0792	18.7613	17.9086	18.4525
ATP11C	20.103	19.7256	19.7997	21.8305	21.2514	21.8798	23.3588	23.1267	23.4197	21.4632	20.7837	21.4096	19.9819	19.8832	19.8772
ATP12A	0	0.0185648	0	0.0209803	0.0170681	0.0397711	0.0241271	0.0324712	0.0236995	0.0207316	0.0480989	0.033694	0.011387	0	0
ATP13A1	22.0939	22.7803	22.1664	23.6616	24.9229	23.9599	22.165	20.7827	21.8282	23.0493	23.3892	23.2251	21.9649	24.0925	22.8272
ATP13A2	12.1589	12.1115	11.9104	12.7716	13.165	11.7377	11.1962	12.2691	12.0526	12.157	12.9496	13.193	15.1739	15.1484	14.8389
ATP13A3	22.5237	21.5686	22.2689	24.4569	23.5351	24.8711	31.4429	31.6023	30.8408	29.1365	27.3602	28.9716	30.8873	30.4772	30.0713
ATP13A4	0.00952214	0.0080175	0	0	0.00736991	0	0	0	0	0	0	0.00096967	0	0	0
ATP13A5	0	0	0	0	0.00927102	0	0	0	0	0	0	0	0	0	0
ATP1A1	347.067	348.963	348.523	330.308	335.096	332.508	322.711	323.052	322.361	359.632	359.178	360.734	375.377	374.806	373.782
ATP1A1OS	4.05774	4.56623	3.89189	2.01443	2.75969	2.82832	2.35396	2.90633	2.46805	3.05009	1.91242	2.51296	2.39047	2.61281	1.52993
ATP1A2	0	0	0	0	0	0	0.00806665	0	0	0	0	0	0	0	0
ATP1A3	0.992505	1.24286	1.02475	1.42267	1.75149	1.71889	1.52561	1.15534	1.44482	1.12737	1.01732	1.06492	1.41379	1.34043	1.56139
ATP1A4	0	0	0	0	0.00823671	0	0.0116438	0	0.011437	0	0	0	0	0	0
ATP1B1	2.12136	1.35983	1.89667	4.79615	3.98006	5.17377	3.62296	4.16423	3.66204	2.79518	3.22238	2.9904	2.31422	2.58305	2.66946
ATP1B2	0.198371	0.292277	0.145291	0.271014	0.211162	0.357372	0.379917	0.462312	0.333164	0.39581	0.324237	0.13885	0.217961	0.315654	0.446374
ATP1B3	95.3782	92.3726	91.9186	89.988	87.6765	87.6595	103.298	104.779	102.339	93.4147	93.2245	95.0255	99.472	97.6271	98.6421
ATP1B4	0	0	0	0	0	0	0	0	0	0	0	0	0	0	0
ATP2A1	0.376263	0.323327	0.307102	0.453421	0.48045	0.440234	0.432978	0.309728	0.437779	0.351296	0.328778	0.296213	0.207191	0.328028	0.363972
ATP2A2	93.4976	93.8911	91.2455	97.1771	97.9477	98.554	87.5425	86.9788	86.3281	91.9198	92.348	92.7148	89.984	90.3338	90.1885
ATP2A3	0.137095	0.0793868	0.0992721	0.0976858	0.1128	0.100313	0.159417	0.0756889	0.114564	0.112691	0.231594	0.15707	0.141831	0.0779209	0.0936109
ATP2B1	40.8593	38.8192	39.581	29.7866	28.5843	29.1905	44.2597	46.3765	44.9801	37.3827	36.9807	38.8417	44.5914	45.7969	45.9473
ATP2B2	0.0132593	0.0302382	0.0216628	0.0596823	0.0243082	0.0318343	0.0290027	0.0264207	0.0434082	0.0290592	0.0313156	0.0274355	0.0548547	0.0482387	0.0436922
ATP2B3	0	0	0	0	0	0	0.00681168	0	0	0	0	0	0	0	0
ATP2B4	6.1502	6.25686	6.13774	8.45989	8.13947	7.90233	7.77067	7.58298	7.70965	6.59007	7.22665	6.9351	7.92461	7.83966	8.03637
ATP2C1	55.8821	55.7203	55.7475	54.8684	53.6664	55.2022	50.493	50.5862	52.7414	49.5616	49.3303	50.439	52.9615	51.0287	51.4814
ATP2C2	0	0.0102641	0.0117652	0.0463444	0.0471885	0	0.026683	0	0.0131037	0.011447	0	0.024824	0.0630351	0.0221702	0.0237253
ATP4A	0	0.00973043	0	0	0.00894641	0	0	0	0	0	0.0100751	0	0	0	0
ATP4B	0.0602377	0.0506987	0	0	0.0233526	0	0	0.0295716	0	0	0.0262331	0.122495	0.0311371	0.0273701	0
ATP5A1	154.737	152.334	157.532	160.339	156.018	157.611	152.987	157.002	154.779	171.019	171.958	172.708	153.403	158.645	158.221
ATP5B	324.054	332.425	330.683	298.064	300.075	302.425	344.403	349.972	342.694	349.486	349.584	344.739	357.539	351.824	362.311
ATP5C1	77.5996	78.9208	78.6299	74.7202	71.3389	72.2435	78.1469	77.4777	77.9513	81.7121	76.8758	80.8462	74.1301	71.82	74.9848
ATP5D	71.9173	81.4465	73.2355	70.3484	74.8695	66.5218	77.3584	72.0421	74.6308	80.9424	85.1909	82.414	81.1382	85.4389	82.2934
ATP5E	544.348	543.313	549.821	603.412	590.101	593.599	644.94	638.937	628.887	622.119	627.957	620.306	536.474	510.984	529.238
ATP5EP2	1.74503	1.30625	1.01688	0.96925	1.97057	1.99408	2.78221	2.95885	1.96428	2.08786	1.63002	1.5804	0.513497	2.02487	1.44234
ATP5F1	66.0598	64.3828	65.6466	60.4707	58.1772	59.7968	67.7371	66.4951	69.6446	66.6869	64.3137	68.9523	60.8284	62.4678	63.097
ATP5G1	189.901	181.696	182.811	181.248	164.797	164.147	167.841	175.559	172.783	183.837	182.148	187.232	176.239	180.852	173.795
ATP5G2	137.649	139.025	143.545	127.285	131.678	131.669	123.455	121.601	127.358	138.704	140.302	140.541	122.962	118.788	120.97
ATP5G3	52.7383	51.3565	52.6434	50.765	50.8426	50.9848	53.1371	52.8036	51.1574	55.1348	56.6402	56.444	49.5893	48.7381	49.4332
ATP5H	262.239	257.991	254.109	246.132	230.495	243.034	245.751	235.231	240.522	270.084	261.584	262.461	243.213	241.654	239.857
ATP5I	387.953	387.187	368.238	363.819	360.979	366.061	384.54	359.257	375.35	396.853	397.173	390.346	325.357	327.409	352.517
ATP5J	137.23	135.65	138.17	131.624	137.285	138.16	135.814	142.226	135.249	146.784	142.352	148.436	129.795	123.858	132.234
ATP5J2	433.106	438.022	426.765	423.437	419.618	411.644	432.46	437.535	444.678	457.206	465.429	460.092	399.579	404.027	420.515
ATP5J2-PTCD1	0.244974	0.0747306	0.0929803	0.387252	0.133311	0.249009	3.24905e-05	0.219644	0.354431	0.0563963	0.0612777	0.207707	0.0575337	0.18786	0.218333
ATP5L	73.0666	75.8282	74.8917	70.5596	69.6608	70.7007	71.6756	74.4187	75.0468	75.75	73.0682	78.5582	69.8482	67.7089	66.5389
ATP5L2	0.0220013	0.0185042	0.0141362	0.0210163	0	0	0	0	0	0	0.148254	0	0	0.0798772	0.0128175
ATP5O	163.268	155.138	161.055	140.549	135.333	135.502	157.251	153.416	151.865	155.79	147.567	158.15	144.28	138.533	140.789
ATP5S	9.23339	9.66443	8.81755	8.75203	8.45747	7.57029	7.20015	8.26237	8.22242	7.13023	8.00629	7.76311	7.00266	7.77173	7.46472
ATP5SL	22.5316	21.1133	21.2812	21.3124	21.0496	21.5219	20.8688	20.4239	20.3	21.4033	21.5781	22.0098	22.8565	22.1714	23.4059
ATP6AP1	124.161	123.554	122.777	115.112	117.868	116.474	111.955	115.654	114.714	124.79	121.676	118.961	123.666	126.209	125.098
ATP6AP1L	2.05815	1.73084	2.53048	1.69564	2.04317	2.11709	2.21137	1.81405	1.68269	1.52922	2.22092	2.37403	1.31974	1.09489	1.65352
ATP6AP2	107.856	104.15	108.369	119.724	115.974	119.02	108.913	111.979	109.813	118.636	115.863	119.483	106.356	105.785	105.513
ATP6V0A1	25.091	25.8138	26.0662	26.9257	26.6451	26.9589	24.4588	23.8789	23.132	25.4684	26.23	25.4106	27.5152	27.4819	27.9062
ATP6V0A2	6.85016	6.68917	6.66502	7.45843	7.44218	7.53815	7.52268	7.88161	7.62369	6.62878	6.86323	6.86548	7.2749	7.08403	6.64946
ATP6V0A4	0	0.0115398	0	0	0	0	0.0150019	0.0134508	0	0.0257442	0.0119474	0	0	0.00103517	0.026679
ATP6V0B	97.904	102.097	98.0273	99.262	100.096	101.321	90.3205	87.761	90.796	99.8828	100.261	99.878	90.6065	98.6583	98.5686
ATP6V0C	160.339	174.277	168.805	140.76	156.791	149.491	129.71	130.893	130.769	142.406	161.543	152.5	160.218	170.833	170.342
ATP6V0CP3	0.142916	0.320348	0.0229397	0.205347	0.0742894	0.103504	0.104992	0.0234348	0	0.0891754	0	0	0	0	0.0308011
ATP6V0D1	37.8227	37.0111	36.4545	30.2609	30.1808	30.7724	28.7327	28.2459	27.9674	31.7087	32.1164	31.022	32.5179	32.8312	33.4445
ATP6V0D2	0	0	0	0	0	0	0	0	0	0	0	0	0	0	0
ATP6V0E1	150.545	146.243	151.475	126.643	126.08	124.385	117.619	118.226	122.67	129.512	128.835	127.88	123.421	114.721	119.572
ATP6V0E2	22.6464	23.2729	23.3081	21.4619	23.2958	22.4582	17.9272	18.4766	17.3583	22.2693	22.3338	22.5809	18.1511	19.3633	19.2581
ATP6V0E2-AS1	0.460358	0.535777	0.692531	0.257395	0.450778	0.536676	0.637234	0.584627	0.684064	0.368676	0.31867	0.427304	0.448054	0.443199	0.368888
ATP6V1A	27.51	25.7898	27.0729	21.6659	21.5709	22.2782	20.6608	20.3869	20.9309	20.986	20.4755	21.2366	20.6822	19.5524	20.5692
ATP6V1B1	1.07545	1.26363	0.734985	0.895192	1.12842	0.868346	0.834375	0.791741	0.819188	0.904272	0.937053	0.888964	0.579145	0.773898	0.675579
ATP6V1B2	90.9086	89.8393	88.0314	81.6276	81.2969	82.6957	88.0181	89.4473	87.4921	93.7212	93.4223	95.9254	92.9398	92.1298	91.8084
ATP6V1C1	26.324	25.4209	25.9041	21.7646	20.9638	21.7675	20.0177	21.4125	21.5833	21.181	21.1727	21.059	22.578	21.4487	22.5428
ATP6V1C2	1.58463	1.15401	1.20132	1.40372	1.16553	1.1063	0.712961	1.05494	0.853698	1.12139	1.25197	1.1658	1.12118	0.867895	1.0593
ATP6V1D	16.6291	15.203	17.3316	20.5571	19.6407	19.0161	20.6899	21.2092	19.868	19.9359	20.2618	19.8538	19.9288	18.4683	18.8886
ATP6V1E1	67.2522	67.2151	65.5687	61.7354	59.4048	59.6724	60.2256	61.2992	64.2348	59.744	60.8245	62.8387	64.3987	66.6397	66.9288
ATP6V1E2	0.656931	0.718889	0.654962	0.812381	0.882249	0.828914	0.599589	0.752299	0.682876	0.760484	0.801369	0.668354	0.543389	0.75638	0.61769
ATP6V1F	159.478	164.87	165.332	140.432	142.693	137.85	134.843	132.369	130.897	141.746	146.267	139.813	156.963	151.972	148.1
ATP6V1G1	29.6151	31.5021	29.1679	27.4825	28.1983	27.0853	24.6134	25.0395	24.3192	29.1777	27.446	27.2875	26.0251	25.2658	25.9997
ATP6V1G2	0.37383	0.376548	0.301815	0.37742	0.409998	0.424235	0.548755	0.628181	0.668972	0.299526	0.69532	0.450846	0.472417	0.352143	0.517179
ATP6V1G2	0	0	0	0	0	0	0	0	0	0	0	0	0	0	0
ATP6V1G2	0	0	0	0	0	0	0	0	0	0	0	0	0	0	0
ATP6V1G2	0	0	0	0	0	0	0	0	0	0	0	0	0	0	0
ATP6V1G2	0	0	0	0	0	0	0	0	0	0	0	0	0	0	0
ATP6V1G2	0	0	0	0	0	0	0	0	0	0	0	0	0	0	0
ATP6V1G2	0	0	0	0	0	0	0	0	0	0	0	0	0	0	0
ATP6V1G2-DDX39B	0.920399	2.6462e-05	0.244603	1.28976	0.405031	0.562114	0.000160026	0.782612	0.464053	1.13773	0.0671919	1.2406	1.29744	1.75685	1.0132
ATP6V1G2-DDX39B	0	0	0	0	0	0	0	0	0	0	0	0	0	0	0
ATP6V1G2-DDX39B	0	0	0	0	0	0	0	0	0	0	0	0	0	0	0
ATP6V1G2-DDX39B	0	0	0	0	0	0	0	0	0	0	0	0	0	0	0
ATP6V1G2-DDX39B	0	0	0	0	0	0	0	0	0	0	0	0	0	0	0
ATP6V1G2-DDX39B	0	0	0	0	0	0	0	0	0	0	0	0	0	0	0
ATP6V1G2-DDX39B	0	0	0	0	0	0	0	0	0	0	0	0	0	0	0
ATP6V1G2-DDX39B	0	0	0	0	0	0	0	0	0	0	0	0	0	0	0
ATP6V1G3	0	0	0	0	0	0	0	0	0	0	0	0	0	0	0
ATP6V1H	31.2688	29.9102	30.2327	26.4811	28.2808	29.0052	26.3122	26.227	26.9473	30.6588	28.653	29.3889	29.6826	29.536	29.864
ATP7A	3.49742	3.53143	3.47417	3.38257	3.3372	3.42526	3.40913	3.42437	3.34407	3.4498	3.41267	3.38976	3.2768	3.08133	3.18945
ATP7B	0.907869	0.946293	1.00421	1.14853	1.26627	1.1934	1.11861	1.17448	1.07312	1.06281	1.03542	1.14587	1.11425	1.08997	1.08688
ATP8A1	0.0144827	0.0406435	0.0191479	0.0366787	0.0562311	0.0434573	0.0791988	0.0334896	0.062075	0.0544109	0.0168396	0.0147533	0.00499293	0.0263359	0.0327088
ATP8A2	0.0887463	0.0611388	0.0467213	0.0306582	0.0437048	0.058123	0.0176524	0.00791575	0.00867029	0.0454603	0.056276	0.0328666	0	0.0293479	0.0314075
ATP8B1	0.0472891	0.0398189	0.0521644	0.0770052	0.036592	0.0304158	0.036949	0.0467466	0.0584226	0.0444126	0.0117814	0.0275234	0.0489075	0.0430071	0.0460256
ATP8B2	12.8488	12.9913	12.1805	13.5431	13.447	13.1813	11.4907	11.9876	10.9327	12.6048	12.0454	11.9403	11.9947	12.6163	11.8776
ATP8B3	0.619755	0.696241	0.704897	0.889759	0.921143	0.829238	0.924043	0.759093	0.806983	0.67916	0.742338	0.6397	0.586614	0.61066	0.60822
ATP8B4	0.155701	0.119182	0.129782	0.0276319	0.0731735	0.0764732	0.0477346	0.0142651	0.0156246	0.0478126	0.031706	0.029626	0.0376063	0.0595354	0.0283101
ATP8B5P	0.0965237	0.0724504	0.0661265	0.0159721	0.0130099	0.0673126	0.0344427	0.0494596	0	0.0413047	0.00182921	0.0662194	0.0325349	0.0916344	0
ATP9A	19.9018	19.7016	20.3918	21.0282	20.4709	20.4831	28.0619	28.6521	28.4489	28.8992	28.8047	29.52	21.9844	21.5158	20.3916
ATP9B	2.01559	2.29423	2.17949	2.65981	2.71072	2.50436	2.16444	2.33475	2.50719	2.47991	2.53835	2.58471	2.10377	2.22326	2.37018
ATPAF1	35.3707	32.646	34.153	32.852	31.2716	34.5929	34.5414	33.0211	32.3368	35.5552	33.1799	32.6977	33.7847	34.2156	32.847
ATPAF2	8.28901	7.9246	8.35838	7.69772	8.03832	8.20306	7.12147	6.89044	6.92799	7.50711	7.47162	6.84284	7.02674	8.03154	7.53612
ATPBD4	3.70051	3.57008	3.26688	3.48267	3.33692	3.76502	3.58491	3.30149	3.98927	3.89062	3.98495	3.99266	3.56886	3.33006	3.26852
ATPBD4-AS1	0.061191	0	0.0295134	0.131076	0.00474462	0.082769	0.067068	0.12016	0	0.0287079	0.0532953	0.0311072	0.0632593	0.0278028	0.118998
ATPIF1	141.771	138.369	135.674	114.499	120.296	121.017	121.607	119.104	119.356	122.806	126.97	124.139	112.433	113.758	113.556
ATR	8.04355	7.96145	8.0334	8.84987	9.07397	9.14788	8.16588	8.38666	8.13633	8.25069	8.08421	8.13019	8.3589	7.7926	7.90416
ATRAID	73.9357	75.7854	78.2113	82.6128	78.4626	83.1373	78.9184	77.7078	73.0325	85.7519	86.9447	85.9112	69.2705	70.3668	68.5595
ATRIP	9.84804	9.55382	9.24565	9.87553	9.52764	9.60917	10.6533	10.1783	10.0862	9.78212	10.6179	10.0065	10.0733	10.4373	9.88618
ATRN	31.9159	32.2284	31.1051	29.2389	29.3732	29.8522	27.7257	27.8006	27.5612	29.0448	28.58	29.0796	29.6877	29.5617	29.9576
ATRNL1	4.22345	4.55977	5.25794	5.77663	4.59109	5.75915	4.41106	3.8385	4.56275	4.28621	4.10934	4.55216	4.6071	4.22815	4.01927
ATRX	15.6394	14.8007	14.9572	15.6486	15.4634	16.1017	15.0186	15.1513	14.9885	15.4718	14.6196	15.4755	13.9888	14.0412	14.4646
ATXN1	9.31364	9.24267	9.46536	9.48218	9.21159	9.12877	9.61507	9.7557	9.71184	9.15086	9.40321	9.10957	10.3088	10.283	10.7513
ATXN10	23.8823	23.7705	23.0578	22.7402	21.7998	22.4309	25.5967	25.3716	25.0662	25.3607	24.2011	25.7962	21.8562	23.0198	23.395
ATXN1L	5.16053	5.46579	5.60385	5.43245	5.1701	5.76261	5.39522	5.15176	5.15523	5.60429	5.1902	5.38011	5.24739	5.39079	5.28624
ATXN2	12.9608	12.6809	12.3066	12.0551	12.07	11.9908	11.8241	11.6048	12.1932	10.9395	11.2065	11.4528	11.2973	11.5954	11.697
ATXN2L	61.2707	65.0552	62.1975	59.8564	61.3453	59.1224	64.1129	62.7855	63.6259	55.7492	58.7706	56.5779	61.5526	63.631	62.1063
ATXN3	1.27277	1.43613	1.42686	1.27883	1.4074	1.18307	1.02971	1.1303	1.16537	1.19661	1.00854	1.0605	1.08047	1.06827	1.0854
ATXN3L	0	0	0	0	0	0	0	0	0	0	0	0	0	0	0
ATXN7	6.51614	6.72867	6.95362	6.90075	6.81296	7.01375	6.26359	7.00848	6.68732	6.29519	6.34201	6.59225	6.85561	6.31665	6.73865
ATXN7L1	2.55819	2.79457	2.67292	2.12257	2.10028	2.05106	2.29564	1.93591	2.52016	2.28214	2.20126	2.35251	1.8498	2.07647	2.03422
ATXN7L2	3.22192	3.19695	3.49236	3.28892	3.23129	3.47002	3.12328	3.39463	3.4695	3.28885	2.67252	3.62887	2.82063	3.2741	3.10471
ATXN7L3	32.3346	34.529	31.9694	31.5801	31.2669	30.7582	30.0601	29.9641	31.1782	31.5969	30.8728	31.5048	31.6375	32.8555	33.4083
ATXN7L3B	37.0004	36.4923	36.997	23.1655	22.2499	23.4165	34.5641	35.0348	34.0597	32.403	32.9149	32.7566	30.6179	30.2139	31.2388
ATXN8OS	0	0	0	0	0	0	0	0	0	0	0	0	0	0	0
AUH	4.64068	4.59245	3.98844	4.28321	3.53211	4.10806	3.82172	4.25234	3.87235	5.17295	5.19382	5.40559	4.09988	3.88515	4.67691
AUNIP	4.8339	5.12608	4.19967	4.17986	4.19893	4.60163	4.85849	4.80632	4.81533	4.34095	3.99332	4.23699	4.6952	4.37508	4.641
AUP1	71.6133	74.3902	78.3448	86.3393	88.9865	85.1109	87.8632	84.9202	85.902	86.5483	91.4632	85.8268	79.186	80.6901	77.5681
AURKA	63.0703	61.5613	61.6178	59.1416	58.2282	58.7586	75.5783	75.7418	77.9732	62.8928	63.5704	66.3479	77.4786	75.9462	75.8586
AURKAIP1	84.5888	87.8787	91.0383	82.3819	82.47	77.6988	82.046	80.6134	82.305	81.0824	87.0956	79.3541	92.5049	90.9942	91.8476
AURKAPS1	0.416226	0.491677	0.49231	0.437916	0.384968	0.322629	0.360118	0.494684	0.439876	0.365443	0.307419	0.267304	0.337198	0.194656	0.319531
AURKB	55.5008	57.7349	56.9215	50.4699	50.7652	50.6843	58.0604	57.1301	60.13	52.2113	51.2859	53.4948	57.0365	58.3795	56.7248
AURKC	0.345225	0.254164	0.249667	0.164491	0.368485	0.311546	0.331416	0.339098	0.603898	0.245199	0.375641	0.265555	0.401436	0.313583	0.503307
AUTS2	10.8604	10.7437	11.3355	16.2066	17.2815	15.9926	14.6521	15.315	15.3083	13.5575	13.9818	13.8961	13.2209	13.6946	13.1771
AVEN	20.7153	17.1203	19.1023	19.6635	20.3372	20.7953	20.2908	20.3673	20.8	20.7873	22.2859	21.2812	21.0216	20.4518	21.028
AVIL	0.222482	0.245844	0.281797	0.211477	0.322988	0.275581	0.289171	0.163746	0.22421	0.30028	0.278776	0.283107	0.201309	0.21493	0.284123
AVL9	9.46891	9.20355	9.38099	10.585	10.0214	11.2053	9.35852	10.2688	10.4137	10.526	9.92143	10.0777	11.1925	10.2346	11.0224
AVP	0	0	0	0	0	0	0	0	0	0	0.0827239	0	0	0	0
AVPI1	5.31385	6.43214	6.32793	4.41972	4.68068	3.87536	3.9914	3.51071	4.12894	4.18543	4.71339	4.20143	4.47599	4.53041	4.91133
AVPR1A	0	0	0	0	0	0	0	0	0	0	0.00442647	0	0	0	0
AVPR1B	0	0	0	0	0	0	0	0	0	0	0	0	0	0	0
AVPR2	0.109553	0.0938032	0.236773	0.0530227	0.0424581	0	0.122106	0.0273537	0.029969	0.102807	0.0715738	0.111409	0.0576099	0.0759631	0.102954
AWAT1	0	0	0	0	0	0	0	0	0	0	0	0	0	0	0
AWAT2	0	0	0	0	0	0	0	0	0	0	0	0	0	0	0
AXDND1	0.0244577	0.0308885	0.0177023	0.0214336	0.018934	0.0220305	0	0.0553293	0.0363633	0.0114819	0.0196626	0.0344475	0.0126455	0.0205091	0.0357005
AXIN1	19.0418	19.961	18.5995	18.6295	18.7138	18.1654	18.0719	17.3494	18.9984	18.5975	20.1221	19.7241	19.891	20.4236	20.7218
AXIN2	1.71265	1.46633	1.45794	1.88326	1.92133	1.94972	1.75808	2.11472	2.14055	1.52698	1.59385	1.76363	2.00999	1.76741	1.75097
AXL	76.1776	75.8244	75.4223	96.1019	97.9553	95.7568	108.746	107.765	106.241	99.2731	99.7588	98.8015	97.8798	99.976	99.8577
AZGP1	21.0279	18.8403	19.9737	29.8667	30.4637	29.7138	17.8992	18.5924	17.2473	22.3525	22.1342	21.7433	17.7463	16.5328	16.8975
AZGP1P1	0.0399527	0.0336194	0	0.03807	0	0.0360478	0	0	0	0	0	0	0.123889	0	0.0776667
AZI1	10.8844	11.3258	11.8767	11.5547	11.1575	10.8521	11.3749	10.596	10.7189	11.436	11.2975	10.7282	11.5073	11.3911	11.5137
AZI2	20.852	20.6485	21.4976	18.0726	18.7134	18.8992	20.93	19.9896	22.3517	20.452	22.4865	20.0575	21.4724	20.2611	19.9857
AZIN1	57.4983	56.354	56.476	61.4855	59.3723	61.8869	54.8268	56.2143	56.1287	54.7422	52.8905	54.8647	53.5684	53.7841	53.9935
AZU1	0	0	0	0	0	0	0	0	0	0	0	0.0561528	0	0	0
B2M	1529.26	1501.98	1503.8	1013.49	982.875	1026.32	848.643	848.088	838.09	963.747	930.453	955.909	903.963	883.107	901.984
B3GALNT1	11.5578	11.8007	10.8786	15.0493	14.5368	13.8688	13.1865	14.0564	13.9294	14.8061	14.569	15.0233	14.1142	12.6494	13.0451
B3GALNT2	7.9964	7.37592	8.08219	7.71117	6.97869	7.44077	7.80037	7.93417	8.13266	7.68907	7.60041	7.39212	7.02755	6.85055	7.02232
B3GALT1	0.237367	0.116561	0.209947	0.206938	0.168555	0.142605	0.108305	0.0776594	0.106344	0.0742719	0.0517117	0.120766	0.122718	0.125871	0.173178
B3GALT2	1.68129	1.7182	1.57784	2.30301	1.98368	2.15147	1.54803	1.31983	1.60772	1.80737	1.64765	2.03061	1.03122	0.864565	1.11703
B3GALT4	1.39146	1.01651	1.41837	0.649595	0.69187	0.639048	0.316416	0.386607	0.404736	0.566681	0.457422	0.560736	0.678583	0.453359	0.561714
B3GALT4	0	0	0	0	0	0	0	0	0	0	0	0	0	0	0
B3GALT4	0	0	0	0	0	0	0	0	0	0	0	0	0	0	0
B3GALT4	0	0	0	0	0	0	0	0	0	0	0	0	0	0	0
B3GALT4	0	0	0	0	0	0	0	0	0	0	0	0	0	0	0
B3GALT5	0	0.0134713	0.0308867	0.106517	0.0743673	0.0865223	0.0876072	0.031412	0.0860335	0.0601036	0.0836992	0.0488714	0.0827507	0.0873086	0.0155681
B3GALT6	23.8709	24.979	25.3942	20.6257	21.085	19.9791	22.0593	22.3224	21.1964	21.9331	23.4596	21.5665	25.0875	25.2002	24.7631
B3GALTL	7.8499	7.44787	7.39895	11.0226	10.2135	10.9442	11.5374	11.2689	11.0549	9.96796	8.84992	9.00179	11.1874	10.6285	10.9509
B3GAT1	0.0116762	0.0196641	0	0.0998896	0.0904106	0.0202324	0.147486	0.132251	0.144863	0.0219307	0.0203605	0.0237798	0.0120748	0	0.011362
B3GAT2	0.655066	0.608456	0.457672	0.494242	0.332549	0.447908	0.494831	0.487801	0.461529	0.530036	0.432991	0.482581	0.583879	0.431175	0.505332
B3GAT3	36.8035	38.3038	39.6416	46.743	48.5999	45.5351	36.3552	37.155	37.1848	46.0989	49.3837	46.761	40.499	41.7835	40.2901
B3GNT1	33.413	34.99	32.6912	32.5238	33.7106	31.7548	29.5339	29.1886	28.707	32.0622	35.3848	33.4476	30.6114	32.692	31.9245
B3GNT2	11.4059	11.2714	11.5953	10.5677	9.605	9.17683	8.71313	8.67939	8.99946	10.0214	8.75867	9.91818	9.77622	9.10854	8.73843
B3GNT3	0.0308499	0	0	0	0.0358338	0.0138968	0.0337703	0	0	0	0.0134445	0.0157008	0	0.0280483	0.0150076
B3GNT4	0.119822	0.151272	0.0866895	0.0855511	0.0696768	0.189081	0.0984926	0.0294111	0.064448	0.112432	0.0782732	0.182748	0.123874	0.136109	0.116512
B3GNT5	23.8742	22.6247	22.644	21.9329	21.4232	22.3213	33.7476	33.8443	34.2517	25.4376	23.6685	24.9859	30.9596	29.5501	30.6634
B3GNT6	0	0	0	0	0.0131068	0	0	0	0	0	0	0	0	0	0
B3GNT7	0.102001	0.0190845	0.00364596	0.0538512	0.0526391	0	0.0248043	0.0222419	0	0.0106422	0.0494014	0	0.0117204	0.0309168	0.0220572
B3GNT8	0	0.117587	0	0	0.0902055	0.0209855	0.0510055	0	0.0250377	0	0.0202851	0.0473689	0.0240721	0.0211622	0.022645
B3GNT9	11.0021	11.1663	10.6919	8.60954	9.32087	9.39145	6.65888	6.68546	6.75626	8.07119	7.70946	7.81861	8.02322	7.75968	7.57912
B3GNTL1	3.99952	4.4787	4.4636	4.18629	5.05004	4.6207	4.31208	4.19904	4.83643	4.68276	4.64404	4.09927	4.10037	4.23484	3.72787
B4GALNT1	36.7286	37.7978	38.0115	32.7768	34.4502	32.5139	27.7853	26.2398	27.704	29.9806	30.65	31.985	28.4789	29.3961	29.5054
B4GALNT2	0	0	0	0.00104463	0.000936086	0	0	0	0	0	0	0	0	0.00366404	0
B4GALNT3	5.3838	5.59288	5.20737	6.37007	6.71584	7.01008	4.65831	4.65935	4.34335	5.56194	5.67591	5.13965	5.39395	5.69862	5.5422
B4GALNT4	28.6116	31.3197	30.4567	37.9068	40.562	36.4221	30.2437	29.4513	29.9241	35.6381	36.7166	34.9558	31.5824	30.9472	31.5972
B4GALT1	35.3876	36.3834	35.8435	40.1038	40.6897	40.0492	38.3948	38.0519	36.1142	43.4919	42.1142	40.9537	41.5593	40.9483	41.9856
B4GALT2	33.4897	33.3516	32.585	35.7403	36.365	34.0479	35.2671	32.8882	35.5784	37.6225	39.4765	37.8863	40.0899	39.0671	39.9024
B4GALT3	10.7398	11.4744	11.6766	11.1227	10.6676	10.9919	12.0623	11.9025	11.386	10.5073	11.0114	11.1737	11.0245	11.5059	12.0602
B4GALT4	20.9984	20.391	19.7029	22.2138	21.8405	21.8834	18.8166	19.5673	20.0878	21.7667	21.6049	21.4236	20.0757	20.2297	20.822
B4GALT5	63.5459	63.1454	64.6041	39.7621	40.1305	41.621	56.8978	57.1215	57.5078	57.2487	55.8828	57.9143	61.6252	62.9395	62.618
B4GALT6	17.6663	16.9061	17.3065	19.5624	18.8234	19.2813	29.2689	29.1681	28.6864	25.9752	24.0595	24.7664	23.4131	23.8329	24.0615
B4GALT7	13.8187	13.33	13.1838	12.5663	14.1349	12.9639	11.5576	11.334	11.0436	12.6091	13.485	13.0419	13.0458	13.9292	12.6196
B9D1	16.9166	17.0479	16.8916	13.7646	14.7782	14.1248	12.1932	12.671	13.8691	16.0757	15.6203	14.6137	14.2068	13.979	13.3249
B9D2	5.86276	6.60344	6.74717	5.99613	6.60831	5.93227	6.0715	6.22382	6.26075	5.98517	5.67818	5.61731	7.23194	6.05463	6.61568
BAALC	3.2458	2.88825	2.87422	3.87139	3.92747	3.71631	7.73686	8.20392	8.33233	4.06662	3.92581	3.75209	8.10871	7.26694	7.97314
BAAT	0.0244399	0.020577	0	0.0116118	0.0189203	0	0.0267464	0.0239822	0.0394066	0.0367196	0.0213052	0.0124393	0.0252738	0.0430778	0.0117088
BABAM1	44.3761	44.9946	45.327	38.0108	41.2054	38.9506	35.8842	38.2557	37.275	39.8219	42.2071	41.606	39.9433	41.4069	40.2102
BACE1	11.654	12.0124	11.6452	12.8325	13.3683	13.242	12.6072	11.9511	12.1254	14.067	13.3341	13.9135	13.0368	12.7778	12.4898
BACE1-AS	1.85762	1.22755	1.21486	1.39426	1.29	1.13914	1.3857	1.17383	1.71563	1.7406	1.03829	1.41274	1.43942	1.50539	1.28833
BACE2	63.8569	63.5103	63.4516	43.3111	43.8268	44.3274	50.3642	50.0651	50.129	50.6068	50.1181	48.3381	62.502	62.9542	62.5082
BACH1	21.7661	20.8815	21.522	25.2596	24.2281	25.3491	21.1299	22.24	22.5419	23.1331	22.3109	22.4719	20.5726	20.2837	20.8226
BACH2	0.377181	0.393178	0.467275	0.172757	0.216536	0.244594	0.291174	0.287687	0.231192	0.37389	0.367246	0.264212	0.292182	0.249397	0.226711
BAD	55.4631	57.953	60.4044	54.0016	56.5799	53.108	51.3033	50.7305	50.5064	52.3304	57.6853	56.6319	59.631	59.9676	59.6253
BAG1	5.60122	5.43384	6.1555	5.7744	5.77535	5.86345	5.63175	5.53754	5.99743	6.50024	5.90593	6.40294	5.84718	5.66038	6.02665
BAG2	3.8482	4.24838	3.6724	4.52038	3.60044	3.73346	3.36235	3.63271	3.50482	3.5529	2.8035	3.42327	3.41361	3.55541	3.41595
BAG3	18.8018	19.8567	18.6343	17.9619	18.5712	19.066	19.9185	18.2911	18.9517	18.7918	19.5559	19.2285	19.3487	19.6082	19.5539
BAG4	7.07027	7.31476	6.93488	8.98724	9.14058	8.78995	9.07816	8.89936	9.28605	8.60907	8.09792	9.12831	8.73238	8.84669	8.69711
BAG5	9.98454	10.2926	10.5001	10.1626	10.3801	10.559	10.2562	10.3676	11.0507	10.3259	10.0738	10.5714	9.91911	10.2854	10.4523
BAG6	75.07	78.7932	77.5169	75.3192	77.8909	75.2387	72.149	73.4917	73.2952	76.0233	79.8941	76.385	78.1924	82.5782	81.1792
BAG6	0	0	0	0	0	0	0	0	0	0	0	0	0	0	0
BAG6	0	0	0	0	0	0	0	0	0	0	0	0	0	0	0
BAG6	0	0	0	0	0	0	0	0	0	0	0	0	0	0	0
BAG6	0	0	0	0	0	0	0	0	0	0	0	0	0	0	0
BAG6	0	0	0	0	0	0	0	0	0	0	0	0	0	0	0
BAG6	0	0	0	0	0	0	0	0	0	0	0	0	0	0	0
BAGE	3.78603e-08	0.0440807	0	0	0	0	0	0	0	0	0.0610892	0	0	0.12148	0.0756164
BAGE2	0.175608	0.0872947	0.0995935	0.0491454	2.48413e-05	2.8205e-05	3.65123e-05	2.93656e-05	0	1.38325e-06	0.177093	0.140669	3.24272e-05	0.0441725	0.0970949
BAGE4	0.0733773	3.15352e-06	0.0303676	9.72367e-05	0.00947884	0.0165182	0.000734473	0.0120043	0	0.0466246	7.67679e-05	2.25126e-07	0.0378039	0.0265589	0.0384594
BAGE5	0.0740443	3.26082e-06	0.0306073	0.000105445	0.00992448	0.0173518	0.000751707	0.0125753	0	0.0474908	8.50099e-05	2.28163e-07	0.0399237	0.0267299	0.0391581
BAHCC1	9.30514	9.2761	8.94187	7.60293	8.16077	7.70393	7.91746	8.19162	7.99356	6.74265	7.0845	6.45629	9.52483	10.615	10.3933
BAHD1	8.45023	8.74188	8.59493	7.66506	7.73347	7.71913	7.57472	7.50383	6.8124	7.22829	7.71154	7.53723	8.2013	8.23077	8.34151
BAI1	0	0	0	0	0.00562995	0.013103	0	0	0	0	0.00634385	0	0	0	0
BAI2	4.34117	4.98855	4.49857	5.53386	5.83286	5.75003	5.39953	5.61214	5.44805	5.09625	5.82049	5.42081	5.93499	6.54054	5.88903
BAI3	0.0427755	0.042021	0.048168	0.14899	0.17127	0.142037	0.179372	0.118909	0.153226	0.113823	0.124328	0.17427	0.081105	0.155607	0.138773
BAIAP2	16.729	16.1858	16.3293	12.6417	13.8636	13.2405	14.5937	14.0674	15.0212	14.5769	14.0744	14.6838	16.0856	17.5716	17.0698
BAIAP2-AS1	15.9425	16.6154	16.1037	16.6676	16.4577	16.2603	14.835	14.6339	15.3937	16.2583	16.601	16.5546	15.928	16.413	16.9218
BAIAP2L1	0.111859	0.0588628	0.0662239	0.129685	0.106071	0.0806014	0.134646	0.098785	0.108206	0.105912	0.122802	0.159454	0.15231	0.206397	0.240681
BAIAP2L2	0.200161	0.202197	0.0675964	0.266518	0.170565	0.360762	0.175354	0.2554	0.236745	0.150311	0.244192	0.305505	0.206964	0.181955	0.253121
BAIAP3	0.0813651	0.091352	0.174538	0.206186	0.241447	0.169674	0.108809	0.186309	0.165195	0.135856	0.173463	0.216395	0.157405	0.106887	0.149591
BAK1	19.0393	20.2174	20.9057	20.6704	19.931	17.8702	21.2979	20.675	20.321	19.6583	21.2157	21.1094	20.7771	22.5632	21.8477
BAMBI	69.5634	70.8536	70.3954	61.0892	60.3748	60.38	44.2052	46.3054	44.2349	60.4358	60.0446	64.2716	50.117	54.0362	52.6443
BANCR	0.3349	0.28157	0.403282	0.320447	0.456516	0.454452	0	0.164686	0.180567	0.235194	0.363671	0.339153	0	0.0759474	0
BANF1	154.998	161.501	158.722	148.329	151.361	148.402	152.332	152.882	152.819	159.55	156.763	157.826	158.365	157.973	162.901
BANF2	0	0	0	0	0	0	0	0	0	0	0	0	0	0	0
BANK1	0.219057	0.282068	0.186584	0.514896	0.458906	0.641116	0.35253	0.455301	0.30376	0.556552	0.390978	0.482387	0.334598	0.416545	0.347508
BANP	4.795	5.44502	5.40212	5.53798	5.51058	5.76821	5.60594	5.92127	5.54215	5.5456	4.95786	5.60976	5.6298	5.99198	5.59953
BAP1	57.1347	58.1235	59.6225	56.818	59.9266	57.5673	57.8364	58.6131	58.4578	59.2543	60.4606	59.3104	60.0577	62.7524	63.404
BARD1	4.27145	4.25233	4.09051	6.1302	6.1253	6.26293	5.56513	5.41933	5.6048	5.83988	5.26111	5.6039	5.55893	5.25667	4.8984
BARHL1	0	0	0	0.0217176	0	0	0	0	0	0	0.0198903	0	0	0	0
BARHL2	0	0	0	0	0.0233708	0	0.0330361	0	0	0.0282832	0	0	0	0	0
BARX1	0	0	0	0	0.0236294	0	0	0	0	0	0	0.0309849	0	0	0
BARX2	0	0	0	0	0	0	0	0	0	0	0	0	0	0	0
BASP1	0.808076	1.1467	1.44306	1.00635	0.960447	1.16257	0.252894	0.219298	0.221826	0.290341	0.247237	0.288439	0.405941	0.272818	0.381856
BASP1P1	0	0.00866425	0	0	0	0	0	0	0.00260754	0	0	0.00418425	0	0	0
BATF	0.0531998	0	0	0	0	0	0	0	0	0	0	0	0	0	0
BATF2	1.0636	0.827779	0.832623	0.782546	1.05714	0.976589	0.923002	0.531823	0.884704	0.866529	0.786937	0.939309	0.850752	0.857407	1.13224
BATF3	0.604309	0.847351	0.825416	0.960668	0.66738	0.818383	0.718724	1.18742	1.08445	1.27483	1.18311	1.02252	0.624523	1.2805	0.68499
BAX	43.405	48.3117	45.3714	43.8999	45.4621	45.2559	40.6427	41.4537	39.8309	43.9622	42.7049	43.555	48.8049	48.6585	50.2457
BAZ1A	17.2457	16.2582	17.4092	14.1078	14.136	14.3129	15.0455	14.8812	14.5177	14.5881	14.2171	15.1224	14.5937	14.253	15.1558
BAZ1B	49.0488	47.4964	47.8853	50.9102	50.8673	51.0303	53.5522	54.9215	55.3477	52.4223	51.3242	52.8686	53.6323	54.2029	54.514
BAZ2A	14.856	15.1794	15.0526	14.7982	14.9372	14.7037	14.3206	13.6738	13.996	14.3202	14.7236	14.5235	14.0474	14.661	14.4899
BAZ2B	2.59351	2.37684	2.34897	2.57425	2.25922	2.41849	2.48465	2.16175	2.08013	2.22531	2.23618	2.15281	2.24622	2.25352	2.12107
BBC3	4.18407	4.36135	4.17901	1.92337	1.71879	1.76012	2.42862	2.06182	2.33977	2.88825	2.20229	2.12583	2.80035	2.86042	2.97727
BBIP1	10.7989	10.4924	10.494	10.1273	9.85727	10.318	9.48898	9.70306	9.26902	10.3595	9.94277	10.8846	7.2585	8.50419	8.90621
BBOX1	0	0.0194573	0.0669051	0.197918	0.0895571	0.0833391	0.0506389	0.11345	0.0497158	0.0650858	0.0402795	0.0940595	0.0477989	0.0840419	0
BBS1	4.06664	4.4139	4.31471	4.96149	4.51371	4.72227	4.39683	4.14676	4.25263	4.40503	4.08963	4.72648	3.72407	4.26575	3.86176
BBS10	7.26922	7.22654	7.38646	6.53186	6.21784	6.98678	7.51471	6.80079	7.06705	6.34632	6.92231	6.62445	6.4672	6.26041	6.67726
BBS12	4.19743	3.42653	4.27819	4.04595	3.50028	3.70631	3.89563	3.61813	3.38334	3.84535	3.64508	3.92697	3.53583	3.46831	3.35185
BBS2	14.9269	13.9897	13.9623	17.3699	17.3491	17.9749	15.7697	15.2761	15.1674	17.8392	17.0799	17.2678	13.7137	14.6395	14.4366
BBS4	7.5985	7.69692	7.01106	6.59118	6.24171	5.84553	6.60604	7.41042	6.76079	7.09726	6.40031	7.36356	6.62683	5.72795	6.32623
BBS5	5.64375	6.05379	5.26272	5.18525	5.27965	5.01492	4.98725	5.18807	4.62904	4.90448	5.04945	4.26355	5.60987	5.32469	5.71095
BBS7	9.44591	8.00004	9.19632	7.86145	8.38245	8.28013	8.48717	8.91395	7.95622	8.62448	8.73818	8.53387	7.60692	7.77836	8.03372
BBS9	3.61754	4.22773	4.11949	3.66946	3.58003	3.76163	3.34257	3.37129	3.19442	4.35024	4.41741	4.05382	3.56109	3.30502	3.22639
BBX	18.3529	18.1598	18.2809	21.5183	20.3389	20.6444	19.0328	19.2852	19.897	18.3394	17.5676	18.2966	21.0132	20.8707	21.1527
BCAM	4.36412	4.48719	3.81102	7.89376	8.62386	8.36029	6.36043	6.06912	5.35887	5.69994	6.23526	5.80713	5.92488	6.87538	6.58436
BCAN	0.0584799	0.0899665	0.0705433	0.119005	0.0910988	0.107036	0.13564	0.129808	0.114868	0.0891912	0.123719	0.0967071	0.256329	0.0971758	0.172193
BCAP29	15.7306	15.3111	15.6471	16.5511	14.9712	15.6456	16.1961	15.5763	15.1696	15.2487	15.035	15.2109	14.3779	13.8997	14.1627
BCAP31	128.71	132.716	129.082	140.346	144.404	142.942	137.258	134.407	131.605	139.189	143.17	141.738	143.883	148.003	137.688
BCAR1	23.2721	23.011	23.2726	21.029	22.3453	21.3006	21.314	20.3436	20.0145	21.2547	22.2296	21.0346	26.2029	26.9116	25.4714
BCAR3	6.26794	5.88848	5.79994	6.24523	6.06864	5.86548	5.89465	5.53819	6.22137	7.36209	7.45775	6.83359	6.05396	6.23179	5.39107
BCAR4	0	0	0	0	0	0	0	0	0	0.079775	0	0	0	0.0641202	0
BCAS1	0.0752769	0.0968153	0.06464	0.0514484	0.0334962	0.100652	0.0382704	0.034316	0.025484	0.0829549	0.0444378	0.0477764	0.0298308	0.0452732	0.0625115
BCAS2	35.2256	34.6796	34.3869	32.4514	31.8559	31.1651	33.8696	33.7886	34.8939	35.7803	35.0415	36.5361	36.1253	35.3744	34.3945
BCAS3	5.50045	5.64034	5.53173	6.2459	6.17354	6.27325	4.98817	4.50645	4.91981	6.52116	5.95116	6.01589	5.14532	4.93783	5.07805
BCAS4	5.57648	5.53588	6.29724	6.08647	5.81109	5.026	6.77119	5.60281	5.68881	6.24118	6.8469	6.10811	6.20699	5.7874	6.31586
BCAT1	1.26832	1.17542	1.12129	1.35483	1.15109	1.13101	1.06593	1.06976	0.950896	1.1701	1.20577	1.2242	1.40055	1.16131	1.14061
BCAT2	13.3917	14.1167	13.5659	10.8138	10.9323	11.0794	9.36722	9.51812	8.93563	11.1853	11.8491	10.6596	11.1347	11.3087	10.7921
BCCIP	30.8904	27.9969	29.891	27.524	25.4161	27.358	30.9503	32.6689	32.8508	29.5591	29.275	30.3564	29.6135	29.6239	26.8447
BCDIN3D	1.71102	1.56363	1.38082	1.68674	1.67073	1.30988	1.50085	1.62485	1.89622	1.76204	1.64856	1.61013	1.38522	1.43996	1.43149
BCDIN3D-AS1	0.255915	0.226677	0.189543	0.281462	0.23851	0.35396	0.176787	0.330147	0.275087	0.240285	0.217946	0.141562	0.347142	0.171338	0.197778
BCHE	27.9961	27.4984	27.0929	28.8364	27.6219	28.3709	23.5569	24.2258	23.9375	33.3654	32.6389	34.7761	23.8775	23.3852	24.2165
BCKDHA	16.0555	16.35	16.6358	15.205	16.0393	15.4476	12.4045	11.6261	13.2433	16.6897	18.2627	15.096	14.9984	16.1242	14.2165
BCKDHB	7.94851	7.95012	7.98164	10.3353	10.1736	10.0959	8.26337	8.10493	7.17637	9.70429	8.4766	8.93106	8.51481	8.33699	7.9499
BCKDK	14.0983	15.0309	15.1836	12.7412	13.3283	12.3519	14.3433	13.7894	14.4917	11.9967	13.2739	12.1031	14.0242	14.8069	13.6411
BCL10	7.29661	6.60489	7.05964	6.45858	6.76773	6.57294	6.50006	6.69865	6.2725	6.71914	6.58195	6.6997	6.5288	6.87159	6.52058
BCL11A	0.0309732	0.0113593	0.017396	0.117103	0.112034	0.113697	0.162317	0.113653	0.109571	0.0676362	0.0629949	0.0881409	0.0209275	0.0748497	0.0739558
BCL11B	0	0	0.000160763	0	0	0	0.0114477	0	0	0	0.000412996	0	0	0.00067812	0
BCL2	4.54148	3.47158	4.06387	4.90702	4.32385	4.62496	3.36016	3.27627	4.17343	3.8603	3.9923	3.86187	3.59295	5.01736	4.34028
BCL2A1	12.0156	11.6374	11.8229	17.6658	16.1783	15.6218	29.4523	28.9247	26.2129	28.4991	24.7704	26.8575	21.4764	23.6181	24.444
BCL2L1	35.2668	36.1103	35.8942	38.626	40.1373	39.9087	35.5577	35.2725	36.2152	36.0115	36.6933	37.6044	37.6196	38.1248	38.1203
BCL2L10	0	0.0482711	0	0.0547704	0.0445971	0	0	0	0	0	0.0499147	0	0.0592965	0	0
BCL2L11	1.42403	1.70944	1.65962	1.66415	1.3884	1.41421	1.5477	1.63984	1.4332	1.49716	1.32865	1.18262	1.54039	1.18484	1.19609
BCL2L12	13.6848	15.1773	14.3924	12.8868	13.3762	12.7495	13.2374	13.5955	12.2088	13.073	13.5347	14.3714	12.9153	13.9375	12.8414
BCL2L13	9.69164	10.0085	9.94923	8.90744	8.91237	8.52312	9.08226	9.01598	8.25311	8.76586	9.00967	9.63633	9.03353	9.04727	8.96392
BCL2L14	0	0	0.0222918	0.0219813	0	0	0	0	0	0	0	0	0	0	0
BCL2L15	0.0243713	0.0273612	0.0548861	0.0154355	0.0188606	0.0365788	0.0622122	0.0557945	0.0349217	0.0534046	0.0495828	0.057915	0.0336064	0.00738784	0.0395314
BCL2L2	6.90735	7.61296	7.10467	7.7248	7.7096	7.60875	6.44716	6.73647	6.74625	6.80303	6.77629	6.4404	6.75323	6.58459	6.29128
BCL2L2-PABPN1	13.5971	14.5332	14.923	14.6272	15.2162	14.7445	15.2097	15.096	16.4605	15.288	15.3169	13.5549	15.1832	14.1249	12.9862
BCL3	16.8881	18.034	19.1479	15.2203	15.4679	15.2435	17.2419	15.3821	15.29	12.9706	13.3671	13.2959	18.0342	18.0009	18.7952
BCL6	17.6772	16.9262	17.0326	11.9124	12.6192	13.2706	11.0181	11.7123	10.9636	10.3913	10.0019	10.713	12.1242	11.8305	11.56
BCL6B	0.0700539	0.0688121	0.0450721	0.055479	0.0542301	0.052583	0.0894388	0.103112	0.0765521	0.153487	0.101784	0.10699	0.0241484	0.0849333	0.0568072
BCL7A	17.979	18.1449	17.5791	6.99933	7.75191	7.13544	6.48676	6.08741	6.13203	6.46935	6.89462	6.45908	8.86302	9.08622	8.2812
BCL7B	46.1462	47.1499	47.0576	44.8321	46.6359	43.5129	42.6189	44.0109	45.6102	44.5206	48.4273	45.8903	44.2607	44.0923	45.7942
BCL7C	49.6642	51.9021	51.6551	53.87	55.1899	54.8736	66.8729	62.3684	67.3811	61.4841	61.019	61.6857	59.9932	61.8956	67.3815
BCL9	4.35289	4.22113	3.95011	5.20995	5.45315	5.35237	5.36136	5.26864	5.26355	5.03159	5.26667	5.11584	5.19118	5.29288	5.17088
BCL9L	8.18082	8.55897	8.11723	8.60429	9.24624	9.05508	7.39641	8.08635	7.89847	7.23964	8.80549	7.76033	8.79053	9.80298	9.36823
BCLAF1	22.2909	21.8799	22.0051	23.1069	22.1177	23.0871	23.443	23.2884	23.2475	24.797	23.9803	24.4904	22.5379	22.5082	22.7166
BCMO1	0	0	0	0	0	0	0	0.0342845	0	0	0	0	0	0	0.0169924
BCO2	0.124895	0.168744	0.212999	0.204516	0.218627	0.171818	0.120126	0.143572	0.0524212	0.167992	0.157273	0.115808	0.226102	0.0570707	0.138223
BCOR	9.03532	9.63669	8.64525	10.6222	11.4029	11.0754	10.3995	10.069	10.1124	10.7716	10.5467	10.296	10.3673	10.4572	10.5592
BCORL1	1.9463	1.92616	1.99201	2.28948	2.18959	2.30891	2.20834	2.0192	2.04333	2.08013	2.20444	2.14778	2.17202	2.15672	2.3952
BCORP1	0	0	0	0	0	0	0	0	0	0	0.00115153	0	0	0	0
BCR	8.49303	7.93674	7.71614	8.58025	8.85259	8.26367	7.83425	7.22444	7.77277	8.10402	7.96257	8.27886	9.29561	9.09095	9.29424
BCRP2	3.58714	3.11995	3.3509	4.23398	3.7925	3.6838	3.55679	2.85121	3.35399	3.69008	3.58173	3.37301	3.97776	3.41137	3.8257
BCRP3	0.881468	0.902474	0.820034	0.910437	0.956762	0.966965	0.849158	0.855543	0.89344	0.857248	1.15672	0.998478	1.13459	1.24728	1.04345
BCS1L	12.7681	12.447	11.6148	11.3567	11.5435	10.98	12.8701	12.5899	12.4379	11.4929	10.7636	11.5016	11.7595	11.9565	12.1487
BCYRN1	0	0	0	4.88706	0	0	0	0	0	0	0	0	0	0	0
BDH1	13.5877	12.8438	12.6378	11.2833	11.3464	11.4402	9.04316	8.87484	9.49538	12.1569	11.713	11.5275	10.4469	10.864	10.3553
BDH2	7.3569	7.30029	7.25813	6.78957	6.50385	6.73057	6.05117	5.5514	5.52824	7.39693	8.00029	7.47455	5.99752	5.20187	5.54584
BDKRB1	0.142182	0	0.034284	0	0	0	0	0.0349056	0	0	0	0	0	0	0
BDKRB2	0.0388248	0.0498518	0.0843101	0.00922243	0.00751248	0.00874161	0.011328	0.0190474	0.0208635	0.00911474	0.0259914	0.0296519	0.0200757	0.0176528	0.00944572
BDNF	0.043521	0.0453459	0.0246516	0.313815	0.369834	0.192202	0.255896	0.259449	0.295071	0.137397	0.177799	0.223155	0.210179	0.166435	0.237869
BDNF-AS	0.499557	0.255174	0.775939	0.608668	0.296645	0.281151	0.389415	0.264905	0.392136	0.517904	0.603204	0.558866	0.126124	0.318637	0.133979
BDP1	4.35029	3.98807	4.07556	4.48073	4.42557	4.70282	4.69905	4.57151	4.78894	4.41054	4.17271	4.41147	4.40369	4.21368	4.38248
BEAN1	0.240427	0.302007	0.15198	0.496	0.381892	0.335762	0.454462	0.394998	0.529877	0.483918	0.480773	0.631181	0.540089	0.448439	0.459699
BECN1	46.3732	44.6306	45.8649	52.8094	51.4214	52.0579	46.2977	49.5596	48.5902	47.9659	50.0631	49.9711	51.0694	50.1806	50.1342
BEGAIN	0.0470965	0.10574	0.0909001	0.0895536	0.0958422	0.0848676	0.189054	0.138669	0.133053	0.117918	0.218948	0.175785	0.178583	0.114192	0.168026
BEND2	0	0	0	0	0	0	0	0	0	0	0	0	0	0	0
BEND3	1.1696	1.32451	1.1984	1.19068	1.32033	1.14495	1.19404	1.37109	1.47381	1.21116	1.3651	1.19136	1.47639	1.40739	1.38358
BEND3P3	0.293614	0.178292	0.245249	0.399046	0.440412	0.396583	0.328591	0.363408	0.269406	0.356359	0.307229	0.324363	0.336364	0.332757	0.323138
BEND4	0	0	0.00432157	0	0.00698029	0.00405842	0	0	0	0.00423367	0.00393099	0	0	0	0.00438753
BEND5	2.04639	2.24759	2.34181	2.67574	2.47509	2.75306	3.23245	3.50811	3.39604	2.7984	3.35255	3.77217	4.30253	4.15989	3.8778
BEND6	1.49002	1.51972	1.38369	1.08213	1.36171	1.17768	1.29465	1.45082	1.3216	1.1274	0.963004	1.02957	1.45093	1.40068	1.4989
BEND7	0.906008	0.826802	0.7455	0.996865	1.0095	0.981277	1.16558	0.839102	0.885632	0.878488	1.15559	0.731843	0.895243	0.988713	1.07311
BEST1	0.329646	0.308555	0.376069	0.155621	0.12789	0.081537	0.115613	0.103061	0.112896	0.124766	0.15707	0.0901802	0.0972934	0.040274	0.148203
BEST2	0.0455763	0.0383645	0.0219865	0	0.0529728	0.0410794	0.0249607	0.0447379	0.0490119	0.0213887	0	0	0.0235615	0.0621406	0.022165
BEST3	0	0	0	0.0137934	0.0112355	0	0	0	0	0	0	0.0295417	0	0	0
BEST4	0.143759	0.138305	0.118894	0.156267	0.206832	0.388671	0.157435	0.141104	0.0883315	0.0578323	0.0894787	0.250755	0.106174	0.0560062	0.13984
BET1	12.2745	11.241	12.7495	10.9604	11.0278	10.9105	8.87206	10.313	10.3093	10.0969	9.84732	10.9199	9.76451	8.93825	9.31414
BET1L	21.5494	21.4788	21.3074	20.7978	21.5553	19.6486	18.163	17.7023	17.9113	20.4181	20.8717	19.6718	18.7332	19.8808	19.0763
BET3L	0	0	0	0	0	0	0	0	0	0	0	0	0	0	0
BEX1	4.07233	6.18255	3.58077	8.47701	6.99496	6.56778	19.4356	19.6784	22.3608	8.93688	8.67329	9.0691	11.4331	11.578	11.5953
BEX2	6.95306	7.95721	8.01132	6.76878	6.95272	6.81854	7.0975	8.3419	7.83307	6.99734	6.43247	6.31099	6.19515	6.22679	7.13391
BEX4	20.3709	19.0423	18.456	15.7621	17.1837	16.6368	18.2541	17.9795	18.362	19.0697	19.2478	18.5644	14.5382	15.7252	16.125
BEX5	0	0	0	0	0.0330794	0	0	0.062723	0	0.0598013	0	0	0	0	0
BFAR	30.0103	28.2227	28.2853	26.8985	26.5813	27.6775	27.6381	26.8987	26.5712	29.3375	29.0429	29.1767	25.8726	27.3207	26.9501
BFSP1	10.9105	10.9961	10.8338	7.22543	7.64219	7.77713	6.37169	6.9515	6.29587	7.33982	8.01759	7.59854	5.39491	5.72933	5.99535
BFSP2	0.0547377	0.0230361	0.079209	0.0520964	0	0.0740257	0.0299895	0	0	0	0.0476821	0	0.0282955	0	0.0266155
BGLAP	1.30289e-36	3.96459e-124	0.43268	9.67526e-67	1.64323e-45	5.31767e-78	4.02232e-35	0.220252	0.12284	0.21438	8.11871e-105	4.99008e-41	4.41059e-21	0.317459	8.84747e-165
BGN	23.2321	25.5071	24.6427	8.2736	8.53803	7.98468	14.119	14.0736	12.7093	17.5903	19.5628	19.1578	13.8368	13.2369	13.541
BHLHA15	0.0784588	0.197915	0.226779	0	0.18326	0.0709552	0	0.0771509	0	0.0734817	0	0	0	0	0.0761431
BHLHA9	0.0781417	0.0657053	0	0	0	0	0	0	0	0.0731856	0	0	0	0	0
BHLHB9	0.822131	0.829868	0.824758	0.980287	0.702548	0.822136	0.720443	0.936338	0.953973	0.919899	0.807319	0.856456	0.710019	0.706278	0.626666
BHLHE22	0.0364351	0	0.0234418	0.0230848	0.0188042	0.0224552	0.00553798	0.0357529	0.039163	0	0	0	0.0125595	0.0110433	0.011818
BHLHE23	0	0	0	0	0	0	0	0	0	0	0	0	0	0	0
BHLHE40	25.7743	25.7224	25.6584	23.0564	23.8484	24.2939	23.7927	21.0713	22.4425	23.58	24.7462	23.7928	28.1543	30.0501	27.8629
BHLHE40-AS1	0.0497757	0.0837543	0.0479921	0.0949486	0	0	0.0546433	0	0	0.04667	0	0.0505357	0.154324	0	0
BHLHE41	1.91885	1.90768	2.05592	0.731422	0.7972	0.556563	0.806664	0.925462	0.897196	0.734225	0.718287	0.849971	1.7125	1.65613	1.52089
BHMT	0	0	0	0	0	0	0.0185118	0	0	0	0.0147368	0	0	0	0
BHMT2	0	0	0.0166122	0	0.0133332	0	0	0	0	0	0	0	0	0	0
BICC1	1.30408	1.34553	1.11724	3.54285	3.62652	3.88383	4.23998	3.6204	4.07663	3.5359	3.21439	3.10498	4.04568	3.53301	3.6276
BICD1	6.92052	6.98764	6.87071	7.45862	7.15984	7.53398	7.08601	6.33316	6.54481	6.83914	6.67464	6.36368	6.40346	6.23659	6.38454
BICD2	23.2537	24.2301	23.6871	25.802	25.8417	25.9236	24.0966	24.9089	24.6248	25.6346	25.5958	25.5769	26.8345	27.1787	26.126
BID	20.2024	20.2453	21.2264	11.0808	9.95	11.2199	10.0518	8.98685	10.4097	10.5739	10.4386	9.88599	11.1744	11.1177	11.4373
BIK	0.156795	0	0.0503891	0.0498603	0	0.11798	0	0	0	0.0979985	0.0454732	0	0.108023	0.0474598	0
BIN1	14.6916	14.5666	15.0796	8.69633	9.53808	9.04422	14.0308	12.7276	14.0001	15.0109	14.286	14.9013	14.6692	15.2949	16.2981
BIN2	0	0	0	0	0	0	0.127164	0	0	0	0	0	0	0.0175948	0
BIN3	25.7022	27.1133	26.9666	23.1362	23.1288	24.2767	19.2623	19.6776	18.7581	20.9465	21.5891	23.7461	21.0195	21.1674	21.1083
BIRC2	62.7711	63.4888	64.4119	57.7294	57.3284	58.5339	55.5437	57.4225	56.3258	52.4184	50.2964	52.3389	53.8132	52.3281	53.9808
BIRC3	48.549	46.9209	47.4088	25.3854	23.4811	23.8258	21.2258	20.9361	21.7071	18.6075	17.9683	18.8877	23.5078	22.9427	23.3405
BIRC5	64.8616	64.5939	65.2022	64.3291	64.738	65.0894	78.5821	80.5107	79.8633	71.0077	70.5648	69.0786	81.5171	80.2709	80.9544
BIRC6	6.8529	6.76943	6.69711	7.86283	7.85011	7.94838	6.5072	6.52416	6.77804	7.159	6.88691	7.0636	6.97949	6.61475	6.58587
BIRC7	0	0	0	0	0	0	0	0	0	0	0	0	0	0	0
BIRC8	0	0	0.00257823	0	0	0	0	0	0	0	0	0	0	0	0
BIVM	7.80041	8.38358	8.02481	9.78244	9.49921	9.35376	10.0039	9.25214	10.1497	9.03778	8.11859	8.57801	9.34034	8.11188	8.67827
BIVM-ERCC5	3.64496	2.29987	2.50351	2.23516	1.72346	1.87099	3.13475	3.75427	3.71794	3.45258	3.03643	1.87794	2.12358	2.06125	2.35338
BLCAP	28.4654	28.8697	27.9322	22.5593	24.5375	22.7674	22.0381	22.9198	21.4759	21.4724	21.9014	21.1318	22.6231	23.3664	23.026
BLID	0.0595951	0.0501288	0	0.0568927	0	0.0538343	0	0.0585668	0.0641936	0.0558555	0	0	0	0	0
BLK	0	0.0136961	0.0156988	0	0.0125988	0	0	0.015966	0	0	0.0141793	0.0165585	0	0	0
BLM	5.73543	5.44794	5.7691	6.18994	5.73239	6.00457	6.15736	5.93522	6.01948	5.94153	5.3444	5.77693	5.84807	5.10161	6.09625
BLMH	43.8787	42.4874	41.2497	38.4004	37.7138	38.4802	39.5683	39.8951	37.8174	43.2247	42.5886	41.6617	40.5722	39.5645	39.4678
BLNK	0	0	0	0	0.0278021	0	0.032128	0	0	0	0	0	0	0	0
BLOC1S1	53.5365	59.0329	50.8919	55.1119	55.3534	55.649	52.1378	55.5261	50.2491	59.6047	58.066	55.1774	50.3766	48.024	48.9502
BLOC1S1-RDH5	0.169691	0.632272	0.138282	0.759518	0.258191	1.0172e-13	0.182001	0.686007	0.00815251	0.440137	0.0730944	0.505086	0.266316	8.59904e-05	0.802067
BLOC1S2	9.28439	8.97605	9.02469	8.54177	8.06545	8.52915	7.77394	7.33522	7.94912	9.03923	8.40797	8.86959	7.69354	7.84242	7.35061
BLOC1S3	6.36678	6.88756	7.42572	6.2688	6.75808	5.92605	6.06545	6.03106	5.74745	5.88605	5.70444	5.91961	6.51659	6.80472	6.90358
BLOC1S4	7.65906	7.66724	6.6888	8.22955	8.38948	8.51472	8.55254	7.49116	7.05284	7.54541	8.59182	8.23059	7.82817	8.54222	8.51978
BLOC1S5	8.20498	7.9326	7.75309	7.17498	7.47745	7.43105	8.65185	9.07077	8.40168	8.55784	7.45049	8.65428	8.14237	7.34088	7.04759
BLOC1S5-TXNDC5	0.428431	0.228688	0.304671	0.602991	0.579938	0.511148	0.741513	1.91454	1.63577	0.907852	1.95456	0.983486	1.07172	1.43417	1.13369
BLOC1S6	23.266	22.6607	24.0034	20.6688	19.6466	20.2967	20.3476	20.9597	20.7361	21.9841	21.7006	22.6454	21.4541	21.086	21.349
BLVRA	29.8521	32.8979	31.1226	32.1991	31.0728	29.6511	34.7751	36.3056	35.9524	35.1903	37.2891	34.7306	30.665	30.5929	31.3602
BLVRB	39.8803	43.5632	41.0505	39.2224	44.0001	44.7206	35.0941	34.0499	33.8875	40.2522	41.5641	39.0544	37.6336	41.7741	37.6802
BLZF1	6.28883	5.54186	5.81394	5.68303	5.73994	6.2799	6.12077	5.6489	6.24752	6.31792	6.26584	6.49343	5.83727	5.65028	6.01061
BMF	0.138324	0.10138	0.151966	0.19148	0.153903	0.242062	0.137143	0.203611	0.148656	0.191351	0.1583	0.132047	0.101733	0.187081	0.108162
BMI1	16.662	15.853	16.2272	16.1299	15.6499	15.0364	16.6949	16.8174	16.5254	18.0288	16.5857	17.8065	17.1642	16.0104	16.1564
BMP1	22.7203	21.2083	21.3503	15.2884	16.122	15.5261	14.985	13.7337	14.428	16.7723	17.5965	16.9956	15.0501	15.1105	15.8827
BMP10	0	0.0237415	0	0.0536968	0	0	0	0	0	0	0	0	0	0.0256347	0
BMP15	0	0	0	0	0	0.0332578	0	0	0	0	0	0	0	0	0
BMP2	8.11056	8.60211	8.18289	7.98416	8.09638	8.65422	4.30866	4.85805	4.6563	5.46424	5.57795	5.40189	4.888	5.19571	5.16299
BMP2K	6.11315	5.91663	6.31713	7.72665	7.99747	7.62029	8.41101	8.91301	8.7385	6.26376	6.77971	6.79429	8.82431	8.0783	8.74035
BMP3	0	0	0	0	0	0	0	0	0	0.00657789	0	0	0	0	0
BMP4	0.212352	0.289714	0.294731	0.31493	0.414255	0.506206	0.589171	0.640519	0.502387	0.788135	0.82758	0.714304	0.473782	0.746904	0.34889
BMP5	0.138323	0.149711	0.209733	0.150347	0.091845	0.0712296	0.0432775	0	0.021247	0.037098	0.0344393	0.0804287	0.0612962	0.107779	0.0192223
BMP6	0.0668569	0.0788035	0	0.076256	0.0129407	0.0602261	0.0146347	0.0306168	0.0862395	0.0669589	0.093246	0.108901	0.0276548	0.0145895	0.0520426
BMP7	0.0214521	0	0.009775	0.298338	0.26654	0.319268	0.3103	0.377641	0.264881	0.0951089	0.0706407	0.0825073	0.104742	0.0552604	0.0985625
BMP8A	0.69576	0.791968	0.748367	0.560415	0.589188	0.626396	0.350357	0.319487	0.351856	0.481937	0.571877	0.514776	0.416939	0.303725	0.415427
BMP8B	5.58622	5.57268	4.93299	4.09009	4.33437	4.47309	2.02855	1.9576	1.75998	3.71446	3.77652	3.71348	2.04519	2.08164	2.06208
BMPER	0.0561819	0.0270318	0.015493	0.0152495	0.0434779	0.021683	0.0263412	0.0157493	0.0258758	0.0150748	0.0349901	0	0	0.00729892	0.0156223
BMPR1A	11.3899	10.5657	11.0816	10.7563	10.1598	11.3099	10.5162	11.5214	11.0283	12.1029	11.4699	11.088	10.6115	10.1937	10.315
BMPR1B	0.00745026	0.0182683	0	0.0283362	0.0173104	0.0201439	0.024471	0.0496678	0.0854885	0.000384474	0.0130009	0.0151857	0.00770527	0.0067758	0.0145112
BMPR2	5.41854	5.16661	5.07806	5.30587	5.34346	5.71346	5.43182	5.65675	5.44078	5.23361	5.42753	5.63841	5.56552	5.36621	5.43375
BMS1	8.12958	8.3053	8.49407	8.53804	8.32311	8.39899	7.88779	8.34826	7.9936	8.57413	8.53377	8.75882	8.3064	8.37288	8.51124
BMS1P2	0.437274	0.552186	0.569288	0.517604	0.445987	0.556931	0.4536	0.652602	0.561088	0.408309	0.399601	0.408574	0.529019	0.413999	0.380248
BMS1P4	1.89851	1.32395	1.50918	1.81548	1.72669	1.94681	1.5811	1.7587	1.56454	1.49609	1.66778	1.44049	1.57004	1.42953	1.61962
BMS1P5	0.645146	0.863497	0.722354	0.742892	0.899013	0.894116	0.792921	1.06342	0.859638	0.658125	0.652223	0.733788	0.815341	0.644018	0.643055
BMS1P5	0.500741	0.608066	0.581706	0.577732	0.620545	0.672264	0.637777	0.785846	0.589195	0.464041	0.466969	0.603049	0.552723	0.467812	0.606728
BMS1P6	0.433786	0.538673	0.56716	0.514406	0.427981	0.575293	0.453284	0.645169	0.557294	0.416926	0.396666	0.395949	0.522709	0.409279	0.379653
BMX	0	0.0141002	0	0.0159245	0.0129711	0.0150903	0	0	0.0180064	0	0.0194649	0	0	0.0152273	0.0162946
BNC1	0.870257	0.695746	0.678736	0.476043	0.48983	0.6729	0.50972	0.767621	0.585725	0.594369	0.620809	0.599791	0.400004	0.495625	0.479074
BNC2	2.34207	2.43328	2.40466	2.56186	2.33685	2.31247	2.96742	2.95698	2.86606	2.70562	2.63288	2.69711	2.72124	2.51204	2.33031
BNIP1	10.3523	8.91157	8.71609	8.25133	7.46219	7.44825	7.41831	6.46375	7.82415	8.19244	9.08778	8.53896	7.12431	8.26292	6.79864
BNIP2	30.7485	31.2554	30.9871	28.2301	26.2247	26.9635	27.434	27.8875	28.1493	29.1741	27.3254	28.4338	26.9097	26.1771	26.0612
BNIP3	33.2224	33.7481	33.2393	24.2308	23.8694	24.1664	27.0463	24.8718	25.681	25.0805	26.1368	24.7115	32.3537	31.3486	31.6128
BNIP3L	37.7286	37.0073	36.1862	33.0232	32.5918	33.0691	31.5483	31.1342	31.3886	34.9794	33.8903	33.6026	33.0901	31.5739	31.6074
BNIPL	0.0794459	0.0740239	0.13415	0.132229	0.107703	0.0633826	0.130499	0.21444	0.128136	0.0990595	0.0919618	0.0536916	0.0410725	0.144962	0.119779
BOC	0.19967	0.192136	0.183533	0.776927	0.780057	0.839184	0.738619	0.718354	0.817499	0.651801	0.613438	0.503485	0.572282	0.795463	0.49041
BOD1	30.9671	31.0321	31.4768	28.9417	29.8887	29.9837	34.4801	35.0377	35.2433	34.1689	34.6811	35.0197	33.5426	34.2154	34.665
BOD1L1	9.66058	9.34396	9.4137	10.0938	9.3283	9.90572	9.03573	9.14847	8.96202	9.04764	8.5507	8.85348	9.14277	9.38202	9.5038
BOD1L2	0.0370165	0	0	0	0.0286568	0	0.0135034	0	0	0	0	0.0125624	0.0127599	0.0224389	0
BOK	2.62145	2.7705	2.23837	4.18396	4.22762	4.15108	2.77407	2.85332	2.80111	2.74825	3.2856	2.86229	3.57599	3.4378	3.63249
BOK-AS1	0.0630959	0.0530698	0	0.0602547	0.0981205	0.0570087	0	0	0.0679752	0	0	0	0	0	0
BOLA1	6.06585	6.56729	5.67332	5.275	4.80865	5.15412	6.79671	7.14172	6.08119	5.7414	5.79795	6.09281	5.21275	5.12507	5.30788
BOLA2	14.6835	15.7246	15.1886	13.2876	14.4869	14.0574	15.9641	15.146	15.2238	15.1933	16.7728	14.5317	14.0461	14.5923	15.4059
BOLA2	15.3399	16.4117	15.9197	14.0316	15.0373	14.6398	16.4152	15.9522	15.9907	15.8483	17.7794	15.3284	14.9078	15.2338	16.3247
BOLA3	52.2968	49.7828	48.6334	50.3891	51.4284	51.1771	52.4448	59.9679	52.6786	57.2609	52.709	52.1045	54.965	52.6878	53.3413
BOLA3-AS1	1.73544	2.40292	2.30942	2.57825	3.29095	2.40999	2.42253	3.58118	2.53937	2.45079	3.40561	2.4529	2.27061	2.76735	2.61107
BOLL	0	0	0	0	0	0.0135927	0.0165154	0	0	0	0.0131506	0	0	0	0
BOP1	39.7748	42.1683	39.6125	37.3421	41.0875	38.3248	44.9457	40.5408	43.3684	43.2074	46.2838	42.8653	46.9595	50.1856	48.9435
BORA	4.0634	4.05681	4.4314	3.67617	3.21667	3.66078	4.87787	4.35829	4.62802	3.65899	3.88407	3.67488	3.98318	4.25752	3.86532
BPESC1	0	0	0	0	0	0	0	0	0	0	0	0	0	0	0
BPGM	23.131	24.5084	25.0165	20.9909	21.1627	20.8117	21.3584	21.8871	20.6818	22.1778	21.3098	20.3356	22.1945	21.0361	20.317
BPHL	11.099	11.0033	11.6193	11.2931	10.978	10.8021	10.4834	11.0614	11.1578	11.8805	12.811	12.7263	10.4882	10.416	10.101
BPI	0.0473917	0	0.0457234	0.0450892	0.0550871	0.085436	0	0.0465212	0	0.0667196	0.0206452	0	0.073499	0.0430759	0
BPIFA1	0	0	0	0	0	0	0	0	0	0	0	0	0	0	0
BPIFA2	0	0	0	0	0	0	0	0	0	0	0	0	0	0	0
BPIFA3	0	0	0	0	0	0	0	0	0	0	0	0	0	0	0
BPIFA4P	0	0	0	0	0	0	0	0	0	0	0	0	0	0	0
BPIFB1	0	0	0	0	0	0	0	0	0	0	0	0	0	0	0
BPIFB2	0	0	0	0	0	0	0	0	0	0	0	0	0	0	0
BPIFB3	0	0	0	0	0	0	0	0	0	0	0	0	0	0	0
BPIFB4	0	0	0	0	0	0	0	0	0	0	0	0	0	0	0
BPIFB6	0	0	0	0	0	0	0	0	0	0	0	0	0	0	0
BPIFC	0	0	0	0	0	0	0	0.00268526	0.00168101	0	0	0	0	0	0
BPNT1	9.77087	10.7793	10.0426	9.56851	9.13951	8.91233	9.59566	9.47125	9.94995	10.7877	10.6595	10.986	8.53367	8.97683	9.02047
BPTF	13.7147	13.6757	13.619	14.5828	14.6273	14.5507	14.5886	14.5578	14.5417	13.7512	13.1012	13.4103	13.3874	14.3208	13.688
BPY2	0	0	0	0	0	0	0	0	0	0	0	0	0	0	0
BPY2B	0	0	0	0	0	0	0	0	0	0	0	0	0	0	0
BPY2B	0	0	0	0	0	0	0	0	0	0	0	0	0	0	0
BRAF	4.91139	4.71733	5.41345	4.29048	4.26173	3.79849	3.9802	3.92953	4.07629	4.14487	4.10703	4.31674	4.75531	4.12964	4.48982
BRAP	9.00565	9.52085	8.93628	8.75952	9.0193	8.54933	9.03271	8.75883	8.37285	8.34246	8.50568	8.7056	8.66305	8.64114	8.30984
BRAT1	20.8312	22.1445	21.5645	23.2816	24.8989	22.4815	20.6411	20.8849	21.4077	22.673	25.1243	23.1137	22.4984	22.8164	23.4357
BRCA1	13.748	13.2647	12.8503	14.775	14.4321	14.9696	13.8105	14.6316	14.4191	13.5372	12.995	13.2681	14.4432	13.6655	14.1189
BRCA2	3.05282	3.02802	2.88195	4.1245	3.78563	3.90407	3.65608	3.82973	3.75945	3.60945	3.3835	3.32989	3.34686	3.31154	3.39918
BRCC3	12.847	12.367	11.97	13.2697	13.3715	13.6109	14.152	13.8221	14.5367	15.6377	14.0702	15.2178	14.154	12.9753	14.2285
BRD1	5.71021	5.92663	5.91887	7.19522	7.42223	7.17885	6.99818	7.09617	6.99728	6.67621	7.0269	7.44597	6.76076	6.64902	7.0899
BRD2	59.8992	61.6606	61.0039	64.4984	63.6111	64.0296	64.7835	64.5173	64.4873	63.5526	64.9148	62.527	60.9766	63.0352	62.0904
BRD2	0	0	0	0	0	0	0	0	0	0	0	0	0	0	0
BRD2	0	0	0	0	0	0	0	0	0	0	0	0	0	0	0
BRD2	0	0	0	0	0	0	0	0	0	0	0	0	0	0	0
BRD2	0	0	0	0	0	0	0	0	0	0	0	0	0	0	0
BRD2	0	0	0	0	0	0	0	0	0	0	0	0	0	0	0
BRD2	0	0	0	0	0	0	0	0	0	0	0	0	0	0	0
BRD3	7.32778	7.59577	8.28339	8.02134	8.37808	8.13321	7.91	7.84936	7.64111	8.51196	8.17873	8.38801	7.93414	8.33669	8.33766
BRD4	27.8776	28.6959	28.0145	25.5264	25.9882	24.6906	27.8939	26.8134	27.058	25.4893	27.1432	26.246	28.2855	28.0073	27.6008
BRD7	26.0813	24.3081	25.6214	24.3961	24.055	25.3331	26.3931	26.128	25.21	25.4817	26.1769	26.319	25.1506	26.4623	25.8691
BRD7P3	0.0172022	0.0241364	0	0	0.00333072	0.00516657	0	0.0056276	0	0.0161493	0	0	0	0	0
BRD8	15.281	15.6732	15.7239	14.0672	15.2252	13.9945	16.8083	17.3345	17.3816	15.0878	14.6195	14.5736	14.0744	14.1165	14.4715
BRD9	18.8839	19.5301	19.0343	18.9162	19.1069	19.1882	19.5704	20.4686	21.3402	20.9168	19.5551	20.3124	19.4627	19.492	18.7924
BRDT	0	0	0	0	0	0	0	0	0	0	0	0	0	0	0
BRE	14.6295	14.7788	15.1973	14.4988	14.859	14.4775	15.1719	15.7822	14.3135	16.9829	16.2952	15.8506	15.4789	15.6741	15.1453
BREA2	0.392148	0.371167	0.0945258	0.140246	0.190341	0.0442518	0.215235	0.192626	0.263879	0.183845	0.127966	0.298618	0.303956	0.0445166	0.381023
BRE-AS1	0.0802326	0.0450211	0.0774023	0.127261	0.12438	0.0241111	0.0879104	0.052511	0.0575307	0.0501959	0.0232976	0.0271994	0	0.0486124	0.0780204
BRF1	10.2473	10.4272	10.647	10.0475	10.179	9.74282	8.4182	9.17789	8.98629	9.50553	9.90087	9.87922	9.8945	10.6314	10.5129
BRF2	11.9022	10.4745	10.231	9.32499	10.2611	9.61537	9.88339	9.02763	9.28491	10.4608	9.30553	9.88566	9.17385	9.61911	9.5431
BRI3	147.982	150.192	150.195	115.004	117.784	117.037	133.149	128.547	122.793	130.655	136.486	131.532	155.701	145.048	142.403
BRI3BP	11.4852	13.1021	12.997	16.606	17.7066	15.2197	15.2576	13.7354	14.9325	14.1771	14.1579	13.4505	16.572	16.2245	15.6559
BRICD5	4.11339	4.93269	4.33096	6.6273	5.12756	5.24942	5.50068	5.06266	5.90445	4.03445	5.18443	4.60907	4.10461	4.55171	4.86988
BRIP1	3.72441	4.01235	3.78273	5.14875	4.68236	5.0628	4.6176	4.87018	4.48374	4.2836	4.07258	4.36608	4.34104	4.22759	4.23173
BRIX1	33.055	31.1253	31.7756	36.0051	33.2356	34.327	37.4877	37.4053	35.5294	36.7243	35.834	37.7829	36.5071	33.645	35.2309
BRK1	165.223	162.331	163.337	148.558	142.871	152.284	157.56	161.438	159.679	168.781	165.141	168.501	146.697	147.864	152.528
BRMS1	37.3345	38.783	37.3063	31.7405	32.9604	31.3615	35.0239	35.3139	33.7314	31.7705	32.6656	33.6072	41.0008	38.8574	37.9848
BRMS1L	9.57384	10.7786	11.0642	10.0482	10.2183	9.84551	9.83815	8.97963	10.538	10.7031	9.92214	10.2756	9.43888	9.44554	9.70685
BROX	10.432	9.88932	10.8011	9.49308	9.04544	9.52342	9.35171	9.98259	8.72678	9.02358	9.06481	8.81473	8.71544	8.97833	8.68495
BRPF1	8.56449	9.22162	8.39654	8.79153	9.1779	9.10355	9.59916	8.54276	9.66413	8.70361	9.18756	9.25291	8.44166	9.15938	8.96266
BRPF3	17.742	17.6925	17.7925	14.8336	15.1058	14.8109	14.0778	14.9216	14.011	13.4034	13.6886	12.6565	14.7843	14.3346	14.5448
BRS3	0	0	0	0	0	0	0	0	0	0	0	0	0	0	0
BRSK1	5.59556	5.50564	5.7643	6.78385	7.28662	6.41314	6.00623	5.71484	5.39887	5.70958	5.54752	6.16314	5.28444	5.95203	5.82504
BRSK2	1.43714	1.44435	1.58923	1.54845	1.55773	1.65284	1.61438	1.88339	1.98425	1.32581	1.23938	1.10421	1.38277	1.36306	1.38081
BRWD1	9.37356	9.21172	9.42673	10.0454	9.2671	9.43472	8.48896	8.98251	9.1387	10.0669	9.79586	10.0293	9.02239	8.16138	9.03006
BRWD1-AS1	0	0	0	0	0	0	0	0	0	0	0	0	0	0	0
BRWD1-IT2	0.142363	0.399261	0.228783	0.135751	0.110546	0.171343	0.260425	0.372942	0.255441	0.0889951	0.206487	0.192749	0.294265	0.172394	0.322778
BRWD3	2.01949	2.0785	2.00875	1.88845	1.76428	1.807	1.73782	1.79224	1.70083	1.81511	1.71568	1.78505	1.69133	1.65792	1.49606
BSCL2	9.94108	13.4686	13.6468	11.5415	10.8726	10.5619	7.48031	7.38896	7.40548	11.9268	10.9063	8.73991	8.8872	9.8157	8.22103
BSDC1	30.5724	30.7238	32.3251	27.8752	27.6821	28.3847	24.2961	23.7928	24.1721	26.5698	27.0223	26.7422	24.2179	24.8569	24.4526
BSG	299.643	309.335	301.179	310.741	325.224	314.544	289.331	281.075	285.725	318.442	342.441	323.055	326.791	340.381	328.139
BSN	0.407655	0.353627	0.367438	0.657558	0.638247	0.625641	0.378634	0.508306	0.387854	0.420984	0.490473	0.515432	0.455927	0.442275	0.449423
BSN-AS2	0.0161801	0.0272432	0	0.0307662	0.0125302	0.0145778	0.0177129	0.0158791	0.0173946	0.0759517	0	0	0.0669245	0	0
BSND	0	0	0	0	0	0	0	0	0	0	0	0	0	0	0
BSPH1	0	0	0	0	0	0	0	0	0	0	0	0	0	0	0
BSPRY	0	0	0	0	0	0	0	0	0	0	0	0.0184329	0	0	0
BST1	10.8967	9.47936	9.5397	13.8029	12.4961	13.4896	10.0363	8.96069	10.0804	10.1385	10.5541	10.7128	8.11589	7.63462	8.19145
BST2	0.106546	0.403349	0.410877	0.203307	0.124162	0.240525	0.409498	0.0523434	0.22947	0.0499424	0.278088	0.270362	0.165157	0.241868	0.258765
BSX	0	0	0	0	0	0	0	0	0	0.0740811	0.0687323	0	0	0.0717637	0
BTAF1	7.17852	6.90819	6.86879	6.79662	6.54488	6.86148	6.79823	7.07601	6.78832	6.52398	6.54143	6.50425	6.57466	6.07014	5.98336
BTBD1	39.31	36.2782	37.6833	38.4662	37.0698	38.0955	37.1804	39.8157	38.7048	39.327	38.6451	39.9174	38.384	39.0573	37.7706
BTBD10	12.8874	13.8202	13.0052	12.8063	11.8978	11.7635	12.4573	12.3088	12.9581	12.257	11.5429	13.3137	13.1954	12.5977	12.7812
BTBD11	0	0	0	0	0	0	0	0	0	0	0.00914355	0	0	0.00211329	0
BTBD16	0.40209	0.796376	0.479215	0.42756	0.421558	0.426395	0.362728	0.232179	0.356108	0.466181	0.30911	0.457149	0.27053	0.300978	0.253053
BTBD17	0.0263973	0	0	0	0	0	0	0	0	0	0	0	0	0	0
BTBD18	0.0545609	0.0344518	0.105307	0.0259304	0.0844876	0.0245752	0.119434	0.0803127	0.0586497	0.0640355	0.0832297	0.027772	0.112843	0.049609	0.119449
BTBD19	3.01639	3.83216	4.74911	4.79424	5.00038	5.28545	4.17866	4.51664	4.10166	4.08557	4.78393	4.19588	3.0302	3.4395	3.32064
BTBD2	36.5775	37.0783	34.5273	41.8252	43.0836	42.642	41.4299	40.0813	39.3949	43.6963	46.4854	45.9305	43.7784	44.3689	43.7398
BTBD3	36.9232	36.1344	36.348	34.0938	34.2901	35.7341	35.97	36.6742	36.5435	38.4429	39.0703	40.2662	33.3975	33.7255	33.7446
BTBD6	21.363	22.075	21.1377	27.5704	27.8173	28.1409	27.5997	26.8375	27.9848	27.9549	29.8969	28.3215	31.1097	30.0842	30.9786
BTBD7	5.08463	5.25734	4.82092	4.95092	4.75544	4.66689	5.35479	4.72863	5.20801	4.96465	4.88625	4.48684	4.97989	4.68471	5.05924
BTBD8	0.376073	0.474767	0.272074	0.447575	0.218713	0.310879	0.137406	0.307712	0.337148	0.205835	0.163767	0.286756	0.161991	0.256303	0.213304
BTBD9	4.31905	4.50306	4.47668	3.89732	3.84826	3.59079	3.77472	3.30171	3.36262	3.41225	3.52599	3.39924	4.00898	3.96775	3.91063
BTC	0.41809	0.410492	0.40326	0.43138	0.432396	0.219982	0.382006	0.239491	0.412363	0.16343	0.455084	0.389536	0.216095	0.284905	0.304846
BTD	11.5471	12.1987	12.5416	14.3198	13.3266	13.5492	10.6412	10.7396	11.8551	11.1915	11.2263	11.8231	10.6008	10.6673	10.7853
BTF3	195.647	197.021	194.042	196.657	192.236	195.343	232.963	224.812	217.724	228.081	220.241	236.031	206.337	202.88	202.505
BTF3L4	11.3391	10.4102	10.7372	11.9719	11.5064	12.0682	12.4723	12.6539	12.6616	13.7876	12.7528	13.4282	12.4794	12.5061	12.2096
BTF3P11	0	0	0	0	0	0	0	0	0	0.0247344	0	0	0	0	0
BTG1	71.4406	70.5765	70.4066	41.2138	40.9435	41.5244	39.2228	39.9474	39.9788	45.313	45.2285	46.587	37.0736	37.2704	36.9357
BTG2	1.79574	1.44664	1.5835	0.662264	0.635347	0.82287	0.762574	0.835573	0.898669	0.842969	0.823067	1.00847	0.672332	0.774105	0.798265
BTG3	35.3061	35.7935	35.3799	29.7439	30.5086	30.3254	34.1709	34.422	33.6512	27.6475	28.0169	29.1024	28.0864	26.0267	25.3996
BTG4	0.0483443	0	0	0	0	0.00545518	0	0	0	0	0.04207	0	0	0	0
BTK	0.0645045	0.122186	0.0311228	0.0306634	0.0624416	0.0435875	0.070615	0.0158261	0.0346731	0.0454191	0.084331	0.0328272	0.0667013	0.0146613	0.00261489
BTLA	0	0	0.03917	0	0.0104738	0.0121863	0	0.0126405	0	0	0.011792	0.0131142	0.0139892	0.0246026	0.0125341
BTN1A1	0	0	0	0	0	0.0132061	0.0160456	0	0	0	0	0	0	0	0
BTN2A1	22.7429	22.6829	23.2542	24.0606	22.1538	22.3496	20.577	21.0975	19.1922	22.0937	21.467	21.0305	22.4223	21.9699	21.094
BTN2A2	11.4257	11.3427	11.6132	10.0645	10.3487	10.4209	8.63546	8.41643	8.7584	9.11319	8.77286	8.55833	9.26622	8.95485	9.31462
BTN2A3P	1.66948	1.79269	1.91098	2.00851	1.75035	1.98006	2.14483	2.02301	1.92307	1.55931	1.71237	1.75114	1.26831	1.56425	1.56343
BTN3A1	13.8929	13.9352	13.348	10.2055	10.428	10.3986	8.21106	8.01337	7.90054	9.68907	9.75534	9.71964	9.11833	8.80037	8.71579
BTN3A2	22.5096	22.2669	22.0039	17.9024	17.7574	16.9179	12.9706	13.2226	13.154	17.7292	18.0445	17.8055	14.4336	14.3615	14.3802
BTN3A3	12.6338	12.6231	13.5169	10.3705	11.0554	10.7523	8.58596	7.69064	7.54291	10.5571	10.5804	11.1776	8.35597	8.65757	7.92144
BTNL2	0	0	0	0	0	0	0	0	0	0	0	0	0	0	0
BTNL2	0	0	0	0	0	0	0	0	0	0	0	0	0	0	0
BTNL2	0	0	0	0	0	0	0	0	0	0	0	0	0	0	0
BTNL2	0	0	0	0	0	0	0	0	0	0	0	0	0	0	0
BTNL2	0	0	0	0	0	0	0	0	0	0	0	0	0	0	0
BTNL2	0	0	0	0	0	0	0	0	0	0	0	0	0	0	0
BTNL2	0	0	0	0	0	0	0	0	0	0	0	0	0	0	0
BTNL2	0	0	0	0	0	0	0	0	0	0	0	0	0	0	0
BTNL3	0	0	0	0	0	0	0	0	0	0	0	0	0	0	0
BTNL8	0	0	0	0	0	0	0	0	0.0598921	0	0	0	0	0	0.0270726
BTNL9	0	0	0	0	0	0	0	0	0	0	0	0	0	0	0
BTRC	3.03917	2.96576	3.095	3.27946	3.45946	3.50228	3.01242	3.35656	2.84256	3.19488	3.18571	3.1953	2.91672	2.902	3.07181
BUB1	27.3122	27.3708	26.4948	26.9616	26.4588	26.4014	32.9895	33.4169	32.7307	29.0793	28.0428	27.5928	31.4301	29.4427	30.1581
BUB1B	22.2989	22.8587	22.5325	24.1367	24.522	24.0716	31.8149	31.8351	31.6498	26.6091	26.5282	25.9966	29.8632	29.3948	30.3152
BUB3	57.5223	59.319	59.0163	58.2301	58.1056	56.6706	63.4597	65.6809	61.6014	62.2478	62.9366	63.4801	60.5821	60.1877	60.3112
BUD13	12.3061	12.316	11.5838	12.5881	13.7429	12.8301	12.5996	15.2489	13.4566	13.3874	13.8991	15.0745	13.239	13.6349	12.6371
BUD31	49.8351	49.4506	52.2991	45.0598	44.8268	44.3971	47.543	47.9023	49.0258	49.5177	52.0695	48.7862	47.2755	45.6781	48.2355
BVES	9.75625	9.60044	9.77331	9.34259	9.17083	9.22149	8.93791	9.01897	9.18649	8.415	7.86079	8.41011	8.94492	8.99887	9.59605
BVES-AS1	0.360458	0.195045	0.447108	0.245008	0.379151	0.371371	0.36671	0.35386	0.332298	0.265793	0.2243	0.18331	0.372672	0.187205	0.300479
BYSL	12.3972	12.8599	12.1993	12.3999	12.0725	11.3759	13.6812	13.0944	14.2905	13.7266	14.6515	13.8989	13.7032	14.6977	13.9497
BZRAP1	0.669776	0.652316	0.680113	0.597349	0.664488	0.632186	0.477407	0.376413	0.348558	0.493453	0.348151	0.469121	0.42017	0.345715	0.398691
BZRAP1-AS1	0.684569	0.603636	0.86339	0.647507	0.66057	0.49082	0.605435	0.515484	0.41821	0.675616	0.558666	0.554211	0.64363	0.406643	0.473046
BZW1	85.2194	83.5438	82.9086	95.9241	89.7981	93.2677	111.525	109.127	107.093	103.919	99.5897	105.455	101.943	98.4853	97.4043
BZW2	60.8555	57.8194	61.1426	55.828	54.9872	55.3342	66.8547	66.9032	65.1404	71.566	70.04	67.7871	57.5889	57.1313	58.3605
C10orf10	0.690931	0.722622	0.84847	0.577532	0.519068	0.641558	0.183439	0.267162	0.157596	0.235835	0.328396	0.276938	0.368026	0.418712	0.244395
C10orf105	0	0.0287723	0.0494734	0	0.0264456	0.0153848	0.0280384	0.0167618	0.0550877	0.0320905	0.052142	0.0348003	0.0265043	0.0543843	0.0332559
C10orf107	0.483887	0.532497	0.717992	0.35459	0.462042	0.604415	0.449014	0.328986	0.640863	0.977666	0.453722	0.416085	0.731041	0.541072	0.434199
C10orf11	0.683537	0.265135	0.201671	0.380554	0.177068	0.159486	0	0.335843	0.306747	0.160178	0.0990962	0.1156	0.17658	0.258582	0.110656
C10orf111	0	0.0867443	0	0.0980687	0.119812	0.0929048	0.0564546	0.0758776	0.05542	0.0483582	0.0224449	0.0262045	0.0266372	0.0702487	0.0501132
C10orf113	0	0	0	0	0	0	0	0	0	0	0	0	0	0	0
C10orf114	0.130646	0.183293	0.18908	0.22784	0.134965	0.0981238	0.190786	0.149612	0.327806	0.183942	0.246647	0.243685	0.247652	0.237513	0.338877
C10orf118	2.20637	2.43775	2.31428	2.03885	2.14143	2.29104	2.0856	1.8018	1.74737	2.20994	1.89613	2.10445	1.99171	1.79783	1.76265
C10orf12	0.964055	0.916954	0.844309	0.966825	0.815203	0.94056	0.937556	0.884598	0.719502	0.955634	0.895022	0.863596	1.09856	1.02281	0.990337
C10orf120	0	0	0	0	0	0	0	0	0	0	0	0	0	0	0
C10orf128	0	0	0	0	0	0	0.253343	0	0	0	0	0	0	0	0
C10orf129	0	0	0	0	0	0	0.0301292	0	0	0	0	0	0	0	0
C10orf131	0.0803202	0	0.0774608	0.191342	0.0311649	0.108706	0.132157	0.157772	0.129664	0	0	0.0408026	0	0.0729654	0.0780694
C10orf137	5.22069	4.60543	4.62267	4.35896	4.50102	4.50702	4.88212	5.52456	5.07737	5.06277	4.66826	5.25397	4.76061	4.4868	4.76406
C10orf2	8.92915	8.88185	9.00739	8.35503	8.66234	8.38544	8.36547	8.29243	9.10411	9.74087	9.66409	9.49456	8.41642	9.0138	8.69363
C10orf25	0.696291	0.694788	0.721737	0.686297	0.648879	0.836288	1.01606	0.708575	0.776167	0.605353	0.595727	0.84015	0.70671	0.691733	0.903359
C10orf32	6.0291	5.79917	6.43548	6.44195	5.77642	5.88666	4.99066	4.71905	4.44793	5.19006	4.51953	4.95687	4.37253	4.72345	4.45513
C10orf32-AS3MT	7.64521e-05	3.3652e-05	0.000328281	0.000953968	0.300982	0.00151071	0.000143478	0.838209	0.00041464	0.664875	0.0045856	0.819352	0.000518881	9.47289e-05	0.000132357
C10orf35	2.10628	2.07388	1.77178	2.22157	1.77433	2.1841	1.91789	2.24505	1.39897	1.4289	1.32617	1.86614	1.76008	1.95382	1.87267
C10orf40	0	0	0	0	0	0	0	0	0	0	0	0	0	0	0
C10orf53	0	0	0	0	0	0	0	0	0	0	0	0	0	0	0
C10orf54	0.262883	0.242769	0.188248	0.322261	0.341266	0.290199	0.371102	0.257931	0.255178	0.390223	0.258783	0.379994	0.228021	0.370166	0.247588
C10orf55	0.0168133	0.056618	0.0486727	0	0.0260425	0.0302978	0.0552212	0.0165009	0.0361517	0.0473532	0.0586144	0.0171122	0.0869284	0	0.0327149
C10orf62	0	0	0	0	0	0	0	0	0	0	0	0	0	0	0
C10orf67	0.0141649	0.0238511	0	0.0269291	0.0109677	0	0.0155042	0.00173757	0	0.0398983	0.012347	0	0	0.0128791	0.0137823
C10orf68	0.0540089	0.0649562	0.0446729	0.0586797	0.0716962	0.0973167	0.104178	0.0302874	0.116122	0.0434627	0.121049	0.112477	0.0478705	0.0420892	0.0600542
C10orf71	0	0	0	0	0	0	0	0	0	0	0	0	0	0	0
C10orf76	1.71069	1.5247	1.19988	1.32305	1.4554	1.39738	1.30589	1.51264	1.36825	1.40096	1.0839	1.4179	0.978073	1.09436	1.326
C10orf82	0	0	0	0	0	0	0	0.0486507	0.0533177	0	0	0	0	0	0
C10orf88	3.2696	3.40222	3.55135	3.3891	3.33359	3.70894	3.60799	3.71024	3.67369	3.65105	3.28404	2.98953	3.38458	3.16861	3.88835
C10orf90	12.6382	13.9184	14.1359	9.62805	9.84768	9.73243	8.0234	7.6901	7.51031	9.82744	9.97021	9.37838	9.61015	9.00986	9.49524
C10orf91	0	0	0	0	0	0	0	0	0	0	0	0	0	0	0
C10orf95	0.123162	0.103657	0.267311	0.205199	0.119373	0.111063	0.101245	0.151158	0.165617	0.057781	0.0804514	0.0626099	0.159155	0.139899	0.299388
C10orf99	0	0	0	0	0	0	0	0	0	0	0	0	0	0	0
C11orf1	10.4475	9.29667	10.0246	8.04855	8.50457	8.16251	8.8779	9.47462	9.19381	8.47683	9.26556	8.97485	8.98017	8.40808	9.22339
C11orf16	0	0	0.0435878	0.0214888	0	0.0407189	0	0	0	0	0.0393629	0	0	0	0
C11orf21	0.0196855	0.0165717	0.0189942	0	0.0152494	0.0177399	0	0	0	0.0184786	0	0	0	0.017895	0
C11orf24	38.3811	40.1856	38.2313	41.4006	42.6963	42.6639	35.7024	34.4431	36.5245	42.295	42.3853	41.7814	35.7905	36.2128	36.5252
C11orf30	5.64198	5.80774	5.56569	5.4289	5.15702	5.82325	5.65294	5.71792	5.87482	5.59343	5.16137	5.4391	5.28145	5.38324	5.15723
C11orf31	52.7095	52.0249	53.208	43.6746	45.2081	45.1471	45.8975	44.4068	43.3646	49.5706	48.6907	47.2825	45.0806	44.8562	42.7089
C11orf34	0.0291208	0	0	0.0277202	0	0.0262576	0.00638277	0	0	0	0.0253651	0	0	0.0264641	0
C11orf35	1.6207	2.10691	1.97946	2.40005	2.54292	2.29257	1.32554	1.67132	1.36768	1.69462	1.78768	1.29419	1.2091	1.66348	1.57652
C11orf40	0	0	0	0	0	0	0	0	0	0	0	0	0	0	0
C11orf42	0.0831708	0.139969	0.160414	0.19816	0.161375	0.262673	0.228105	0.0816892	0.0895159	0.156012	0.144801	0	0.128949	0.188878	0.242506
C11orf44	0	0	0	0	0	0	0	0	0	0	0	0	0	0	0
C11orf45	0.312127	0.304486	0.312388	0.355538	0.393642	0.285005	0.227708	0.222486	0.230775	0.336507	0.384629	0.287656	0.280474	0.380196	0.242317
C11orf48	24.9438	22.991	23.3513	21.8606	21.5656	22.4361	23.8828	24.611	24.0008	23.4009	24.0935	23.9325	23.2209	23.7112	22.0847
C11orf49	23.9695	24.9561	24.5831	20.8666	22.7865	21.0898	22.6321	23.9712	20.9835	25.3854	27.6084	23.3561	24.1769	21.697	22.4824
C11orf52	0	0	0	0	0	0	0	0	0	0.0391271	0	0	0	0	0
C11orf53	0	0	0	0	0	0	0	0	0	0	0	0	0	0	0
[truncated: 23,276 more rows]
